# Supplementary material
Source: publisher figshare collection journal article supplement (https://gsajournals.figshare.com/ndownloader/files/18714665)
Supplement: Supplementary file 1 [file 18714665]

## Sheet: Sheet1
Code	Gene_id	90128_24_readcount(90128_24vsck)	ck_readcount(90128_24vsck)	log2FoldChange(90128_24vsck)	pval(90128_24vsck)	padj(90128_24vsck)	significant(90128_24vsck)	biological_process	biological_process_description	cellular_component	cellular_component_description	molecular_function	molecular_function_description	KEGG AnnotInfo	KEGG url	Gene name	Interpro Description
1	Novel00009	149.45	53.1124	1.4925	0.004649	0.015349	UP	GO:0007267//GO:0009987//GO:0023052//GO:0008150//GO:0007154//GO:0007268	cell-cell signaling//cellular process//signaling//biological_process//cell communication//chemical synaptic transmission	GO:0016020//GO:0005575//GO:0016021//GO:0044425//GO:0031224	membrane//cellular_component//integral component of membrane//membrane part//intrinsic component of membrane	GO:0003674//GO:0043495//GO:0033130//GO:0005102//GO:0005488//GO:0005515	molecular_function//protein membrane anchor//acetylcholine receptor binding//signaling receptor binding//binding//protein binding	--	--	--	--
2	Novel00010	284.105	103.584	1.4556	1.0995e-05	7.623e-05	UP	GO:0019954//GO:0000003//GO:0030436//GO:0032502//GO:0008150//GO:0043934	asexual reproduction//reproduction//asexual sporulation//developmental process//biological_process//sporulation	GO:0042763//GO:0044464//GO:0005623//GO:0005575//GO:0042601	intracellular immature spore//cell part//cell//cellular_component//endospore-forming forespore	--	--	--	--	--	PREDICTED: uncharacterized protein LOC102580264 [Solanum tuberosum]
3	Novel00013	752.563	160.068	2.2331	5.2822e-15	2.1394e-13	UP	--	--	--	--	--	--	no KO assigned | (RefSeq) uncharacterized LOC102604506	http://www.genome.jp/dbget-bin/www_bget?sot:102604506	--	PREDICTED: uncharacterized protein LOC102604506 [Solanum tuberosum]
4	Novel00014	49.2572	1.53095	5.0078	0.00019662	0.00099372	UP	GO:0008150//GO:0009607//GO:0050896//GO:0006952//GO:0006950	biological_process//response to biotic stimulus//response to stimulus//defense response//response to stress	--	--	--	--	no KO assigned | (RefSeq) kirola-like	http://www.genome.jp/dbget-bin/www_bget?sot:102602597	--	PREDICTED: kirola [Solanum lycopersicum]
5	Novel00023	79.2616	8.70791	3.1862	6.4949e-05	0.00037275	UP	--	--	--	--	--	--	no KO assigned | (RefSeq) uncharacterized LOC102581590	http://www.genome.jp/dbget-bin/www_bget?sot:102581590	--	PREDICTED: uncharacterized protein LOC102602858 [Solanum tuberosum]>gi|565391375|ref|XP_006361398.1| PREDICTED: uncharacterized protein LOC102581590 [Solanum tuberosum]
6	Novel00030	52.3019	4.38444	3.5764	3.8151e-06	2.958e-05	UP	GO:0009607//GO:0008150//GO:0006950//GO:0006952//GO:0050896	response to biotic stimulus//biological_process//response to stress//defense response//response to stimulus	--	--	--	--	no KO assigned | (RefSeq) kirola-like	http://www.genome.jp/dbget-bin/www_bget?sot:102585601	--	PREDICTED: kirola-like [Solanum tuberosum]
7	Novel00031	30.458	7.12654	2.0955	0.012647	0.036117	UP	--	--	--	--	--	--	--	--	--	--
8	Novel00040	109.179	47.9041	1.1885	0.007979	0.024403	UP	GO:0032196//GO:0008152//GO:0044260//GO:0071704//GO:0006725//GO:0008150//GO:0009987//GO:1901360//GO:0006139//GO:0044237//GO:0043170//GO:0006313//GO:0034641//GO:0006259//GO:0006807//GO:0006310//GO:0044238//GO:0046483//GO:0090304	transposition//metabolic process//cellular macromolecule metabolic process//organic substance metabolic process//cellular aromatic compound metabolic process//biological_process//cellular process//organic cyclic compound metabolic process//nucleobase-containing compound metabolic process//cellular metabolic process//macromolecule metabolic process//transposition, DNA-mediated//cellular nitrogen c…	--	--	GO:0008270//GO:0004803//GO:0003674//GO:0043167//GO:0003676//GO:1901363//GO:0003824//GO:0097159//GO:0005488//GO:0046872//GO:0003677//GO:0046914//GO:0043169	zinc ion binding//transposase activity//molecular_function//ion binding//nucleic acid binding//heterocyclic compound binding//catalytic activity//organic cyclic compound binding//binding//metal ion binding//DNA binding//transition metal ion binding//cation binding	no KO assigned | (RefSeq) uncharacterized LOC102599683	http://www.genome.jp/dbget-bin/www_bget?sot:102599683	--	Transposon MuDR mudrA-like protein, putative [Solanum demissum]
9	Novel00057	843.372	308.571	1.4506	2.5218e-08	3.2131e-07	UP	GO:0009733//GO:0042221//GO:0008150//GO:0009719//GO:0010033//GO:0009725//GO:0050896	response to auxin//response to chemical//biological_process//response to endogenous stimulus//response to organic substance//response to hormone//response to stimulus	--	--	--	--	K08739 DNA mismatch repair protein MLH3 | (RefSeq) DNA mismatch repair protein MLH3	http://www.genome.jp/dbget-bin/www_bget?sot:102597269	--	PREDICTED: DNA mismatch repair protein MLH3 [Nicotiana tomentosiformis]
10	Novel00060	238.113	118.982	1.0009	0.0028571	0.010122	UP	GO:1901361//GO:0009116//GO:0009119//GO:1901135//GO:0034641//GO:0046087//GO:0046133//GO:0044238//GO:0046483//GO:0006213//GO:0046131//GO:0006807//GO:1901575//GO:0044237//GO:1901360//GO:0006139//GO:0009972//GO:0034655//GO:0009164//GO:1901136//GO:1901658//GO:0072527//GO:1901657//GO:0006216//GO:0044270//GO:1901564//GO:0008150//GO:0009987//GO:0044248//GO:0044281//GO:0009056//GO:0072529//GO:1901565//GO:…	organic cyclic compound catabolic process//nucleoside metabolic process//ribonucleoside metabolic process//carbohydrate derivative metabolic process//cellular nitrogen compound metabolic process//cytidine metabolic process//pyrimidine ribonucleoside catabolic process//primary metabolic process//heterocycle metabolic process//pyrimidine nucleoside metabolic process//pyrimidine ribonucleoside metab…	--	--	GO:0016814//GO:0043169//GO:0046914//GO:0005488//GO:0046872//GO:0004126//GO:0003824//GO:0016810//GO:0008270//GO:0016787//GO:0043167//GO:0003674//GO:0019239	hydrolase activity, acting on carbon-nitrogen (but not peptide) bonds, in cyclic amidines//cation binding//transition metal ion binding//binding//metal ion binding//cytidine deaminase activity//catalytic activity//hydrolase activity, acting on carbon-nitrogen (but not peptide) bonds//zinc ion binding//hydrolase activity//ion binding//molecular_function//deaminase activity	--	--	--	PREDICTED: mRNA cap guanine-N7 methyltransferase 1-like [Solanum lycopersicum]
11	Novel00127	21.4963	1.89811	3.5014	0.0031877	0.01113	UP	--	--	--	--	--	--	no KO assigned | (RefSeq) basic proline-rich protein-like	http://www.genome.jp/dbget-bin/www_bget?sot:102598061	--	PREDICTED: repetitive proline-rich cell wall protein 2-like [Solanum tuberosum]
12	Novel00143	68.3747	29.1955	1.2277	0.018477	0.049814	UP	GO:0055114//GO:0008150//GO:0008152	oxidation-reduction process//biological_process//metabolic process	--	--	GO:0016655//GO:0016491//GO:0016651//GO:0003824//GO:0003674	oxidoreductase activity, acting on NAD(P)H, quinone or similar compound as acceptor//oxidoreductase activity//oxidoreductase activity, acting on NAD(P)H//catalytic activity//molecular_function	no KO assigned | (RefSeq) uncharacterized LOC102593926	http://www.genome.jp/dbget-bin/www_bget?sot:102593926	--	PREDICTED: uncharacterized protein LOC102593926 isoform X4 [Solanum tuberosum]
13	Novel00158	162.977	43.5871	1.9027	3.4637e-06	2.7175e-05	UP	--	--	--	--	GO:0005488//GO:0005515//GO:0003674	binding//protein binding//molecular_function	no KO assigned | (RefSeq) uncharacterized LOC102590186	http://www.genome.jp/dbget-bin/www_bget?sot:102590186	--	PREDICTED: topless-related protein 1-like isoform X1 [Solanum tuberosum]
14	Novel00190	7985.73	3879.42	1.0416	7.4267e-06	5.3489e-05	UP	GO:0019538//GO:0044238//GO:0043170//GO:0008150//GO:0071704//GO:0006508//GO:0008152	protein metabolic process//primary metabolic process//macromolecule metabolic process//biological_process//organic substance metabolic process//proteolysis//metabolic process	--	--	GO:0017111//GO:0004176//GO:0016887//GO:0008233//GO:0016817//GO:0042623//GO:0016462//GO:0070011//GO:0003824//GO:0003674//GO:0016818//GO:0016787	nucleoside-triphosphatase activity//ATP-dependent peptidase activity//ATPase activity//peptidase activity//hydrolase activity, acting on acid anhydrides//ATPase activity, coupled//pyrophosphatase activity//peptidase activity, acting on L-amino acid peptides//catalytic activity//molecular_function//hydrolase activity, acting on acid anhydrides, in phosphorus-containing anhydrides//hydrolase activi…	K02908 large subunit ribosomal protein L30e | (RefSeq) 60S ribosomal protein L30-like	http://www.genome.jp/dbget-bin/www_bget?sot:102599049	--	PREDICTED: 60S ribosomal protein L30-like [Solanum tuberosum]
15	Novel00205	130.419	16.3113	2.9992	1.63e-05	0.00010802	UP	GO:0044237//GO:0006139//GO:1901360//GO:0044271//GO:0072522//GO:0042278//GO:1901659//GO:0072521//GO:0009116//GO:1901135//GO:0009119//GO:0018130//GO:0034654//GO:0006732//GO:0034641//GO:0042398//GO:0046500//GO:0044238//GO:0046483//GO:0051186//GO:0009108//GO:0006807//GO:0009058//GO:0044272//GO:0006575//GO:0008152//GO:0046129//GO:1901137//GO:0071704//GO:0006725//GO:1901576//GO:0055086//GO:0051188//GO:…	cellular metabolic process//nucleobase-containing compound metabolic process//organic cyclic compound metabolic process//cellular nitrogen compound biosynthetic process//purine-containing compound biosynthetic process//purine nucleoside metabolic process//glycosyl compound biosynthetic process//purine-containing compound metabolic process//nucleoside metabolic process//carbohydrate derivative met…	--	--	GO:0016765//GO:0016903//GO:0003674//GO:0016620//GO:0003824//GO:0016491//GO:0016740//GO:0004478	transferase activity, transferring alkyl or aryl (other than methyl) groups//oxidoreductase activity, acting on the aldehyde or oxo group of donors//molecular_function//oxidoreductase activity, acting on the aldehyde or oxo group of donors, NAD or NADP as acceptor//catalytic activity//oxidoreductase activity//transferase activity//methionine adenosyltransferase activity	--	--	--	--
16	Novel00206	84.5489	17.6958	2.2564	4.0157e-05	0.00024207	UP	--	--	--	--	--	--	--	--	--	--
17	Novel00224	66.7757	20.1058	1.7317	0.0019799	0.0074058	UP	GO:0042254//GO:0071840//GO:0051179//GO:0044085//GO:0051234//GO:0006810//GO:0008150//GO:0042274//GO:0022613	ribosome biogenesis//cellular component organization or biogenesis//localization//cellular component biogenesis//establishment of localization//transport//biological_process//ribosomal small subunit biogenesis//ribonucleoprotein complex biogenesis	GO:0044464//GO:0005623//GO:0005886//GO:0016020//GO:0005575//GO:0071944	cell part//cell//plasma membrane//membrane//cellular_component//cell periphery	--	--	no KO assigned | (RefSeq) bax inhibitor 1-like	http://www.genome.jp/dbget-bin/www_bget?sot:102604615	--	PREDICTED: bax inhibitor 1-like [Solanum tuberosum]
18	Novel00237	199.39	53.2341	1.9052	5.9304e-07	5.5888e-06	UP	GO:0071704//GO:0006508//GO:0008152//GO:0008150//GO:0043170//GO:0019538//GO:0044238	organic substance metabolic process//proteolysis//metabolic process//biological_process//macromolecule metabolic process//protein metabolic process//primary metabolic process	GO:0005575//GO:0005576	cellular_component//extracellular region	GO:0003674//GO:0043167//GO:0008237//GO:0004175//GO:0016787//GO:0008270//GO:0097159//GO:0070011//GO:0003824//GO:0003676//GO:1901363//GO:0008233//GO:0046872//GO:0004222//GO:0005488//GO:0046914//GO:0043169	molecular_function//ion binding//metallopeptidase activity//endopeptidase activity//hydrolase activity//zinc ion binding//organic cyclic compound binding//peptidase activity, acting on L-amino acid peptides//catalytic activity//nucleic acid binding//heterocyclic compound binding//peptidase activity//metal ion binding//metalloendopeptidase activity//binding//transition metal ion binding//cation bi…	no KO assigned | (RefSeq) uncharacterized LOC102600866	http://www.genome.jp/dbget-bin/www_bget?sot:102600866	--	PREDICTED: uncharacterized protein LOC102600866 [Solanum tuberosum]
19	Novel00244	57.1143	18.6402	1.6154	0.0054597	0.017603	UP	--	--	--	--	--	--	--	--	--	--
20	Novel00253	37.3768	5.50837	2.7624	0.0005762	0.0025414	UP	--	--	GO:0019033//GO:0044423//GO:0005575//GO:0019012	viral tegument//virion part//cellular_component//virion	--	--	--	--	--	--
21	Novel00292	48.9665	11.0825	2.1435	0.0019763	0.007394	UP	GO:0071704//GO:0097659//GO:0006351//GO:0034645//GO:0006725//GO:1901576//GO:0044260//GO:2001141//GO:0008152//GO:0051252//GO:1903506//GO:0051171//GO:0009987//GO:1901362//GO:0080090//GO:0019438//GO:0050789//GO:0031323//GO:0044249//GO:0009889//GO:2000112//GO:0031326//GO:0008150//GO:0006355//GO:0043170//GO:0019222//GO:0009059//GO:0019219//GO:0044237//GO:0044271//GO:0006139//GO:1901360//GO:0046483//GO:…	organic substance metabolic process//nucleic acid-templated transcription//transcription, DNA-templated//cellular macromolecule biosynthetic process//cellular aromatic compound metabolic process//organic substance biosynthetic process//cellular macromolecule metabolic process//regulation of RNA biosynthetic process//metabolic process//regulation of RNA metabolic process//regulation of nucleic aci…	--	--	GO:0003674//GO:0045735	molecular_function//nutrient reservoir activity	no KO assigned | (RefSeq) germin-like protein subfamily 1 member 17	http://www.genome.jp/dbget-bin/www_bget?sot:102593333	--	PREDICTED: germin-like protein subfamily 1 member 15-like [Solanum tuberosum]
22	Novel00365	1645.06	798.083	1.0435	1.5964e-05	0.00010602	UP	--	--	--	--	--	--	K10900 werner syndrome ATP-dependent helicase [EC:3.6.4.12] | (RefSeq) ATP-dependent DNA helicase Q-like SIM	http://www.genome.jp/dbget-bin/www_bget?sot:102598356	--	PREDICTED: ATP-dependent DNA helicase Q-like SIM-like isoform X4 [Solanum tuberosum]
23	Novel00368	3047.2	1194.68	1.3509	1.6479e-05	0.00010908	UP	--	--	GO:0044425//GO:0016021//GO:0031224//GO:0005575//GO:0016020	membrane part//integral component of membrane//intrinsic component of membrane//cellular_component//membrane	--	--	no KO assigned | (RefSeq) WAT1-related protein At1g09380-like	http://www.genome.jp/dbget-bin/www_bget?sot:102582367	--	PREDICTED: WAT1-related protein At1g09380-like [Solanum tuberosum]
24	Novel00381	3754.59	982.703	1.9338	3.35e-15	1.4107e-13	UP	--	--	--	--	--	--	K13696 abhydrolase domain-containing protein 1/3 | (RefSeq) embryogenesis-associated protein EMB8-like	http://www.genome.jp/dbget-bin/www_bget?sot:102594564	--	PREDICTED: embryogenesis-associated protein EMB8-like [Solanum tuberosum]
25	Novel00387	286.586	59.1235	2.2772	5.9931e-11	1.2745e-09	UP	GO:0043170//GO:0044238//GO:0019538//GO:0008152//GO:0006508//GO:0071704//GO:0008150	macromolecule metabolic process//primary metabolic process//protein metabolic process//metabolic process//proteolysis//organic substance metabolic process//biological_process	GO:0044424//GO:0043229//GO:0005623//GO:0044464//GO:0005634//GO:0005622//GO:0043227//GO:0043231//GO:0005575//GO:0043226	intracellular part//intracellular organelle//cell//cell part//nucleus//intracellular//membrane-bounded organelle//intracellular membrane-bounded organelle//cellular_component//organelle	GO:0005488//GO:0008233//GO:0005515//GO:0016787//GO:0003674//GO:0003824	binding//peptidase activity//protein binding//hydrolase activity//molecular_function//catalytic activity	K02365 separase [EC:3.4.22.49] | (RefSeq) separase	http://www.genome.jp/dbget-bin/www_bget?sot:102604188	--	PREDICTED: separase-like [Solanum tuberosum]
26	Novel00397	30.3861	0	Inf	2.8906e-07	2.909e-06	UP	GO:0008152//GO:0008150	metabolic process//biological_process	--	--	GO:0000287//GO:0016829//GO:0043167//GO:0003674//GO:0003824//GO:0010333//GO:0005488//GO:0016835//GO:0046872//GO:0016838//GO:0043169	magnesium ion binding//lyase activity//ion binding//molecular_function//catalytic activity//terpene synthase activity//binding//carbon-oxygen lyase activity//metal ion binding//carbon-oxygen lyase activity, acting on phosphates//cation binding	K12742 isoprene synthase [EC:4.2.3.27] | (RefSeq) (-)-camphene/tricyclene synthase, chloroplastic-like	http://www.genome.jp/dbget-bin/www_bget?sot:102601401	--	PREDICTED: (-)-camphene/tricyclene synthase, chloroplastic-like [Solanum tuberosum]
27	Novel00398	85.3904	26.53	1.6864	0.0010324	0.0042144	UP	GO:0044267//GO:0006468//GO:0044238//GO:0036211//GO:0019538//GO:0044237//GO:0043170//GO:0016310//GO:0006464//GO:0043412//GO:0008150//GO:0009987//GO:0006796//GO:0008152//GO:0006793//GO:0071704//GO:0044260	cellular protein metabolic process//protein phosphorylation//primary metabolic process//protein modification process//protein metabolic process//cellular metabolic process//macromolecule metabolic process//phosphorylation//cellular protein modification process//macromolecule modification//biological_process//cellular process//phosphate-containing compound metabolic process//metabolic process//pho…	--	--	GO:0004672//GO:0016772//GO:0016773//GO:0003824//GO:0016740//GO:0016301//GO:0003674	protein kinase activity//transferase activity, transferring phosphorus-containing groups//phosphotransferase activity, alcohol group as acceptor//catalytic activity//transferase activity//kinase activity//molecular_function	no KO assigned | (RefSeq) lysM domain receptor-like kinase 3	http://www.genome.jp/dbget-bin/www_bget?sot:102585834	--	PREDICTED: receptor-like serine/threonine-protein kinase At3g01300-like [Solanum tuberosum]
28	Novel00464	87.7678	30.9751	1.5026	0.0027535	0.0098146	UP	GO:0009617//GO:0023052//GO:0050789//GO:0008150//GO:0009987//GO:0009607//GO:0032502//GO:0030154//GO:0043207//GO:0007166//GO:0042742//GO:0048869//GO:0051707//GO:0050794//GO:0050896//GO:0006952//GO:0065007//GO:0098542//GO:0007219//GO:0007275//GO:0007165//GO:0051716//GO:0006950//GO:0009605//GO:0007154//GO:0032501//GO:0051704	response to bacterium//signaling//regulation of biological process//biological_process//cellular process//response to biotic stimulus//developmental process//cell differentiation//response to external biotic stimulus//cell surface receptor signaling pathway//defense response to bacterium//cellular developmental process//response to other organism//regulation of cellular process//response to stimu…	GO:0016020//GO:0005575//GO:0031224//GO:0044425//GO:0016021	membrane//cellular_component//intrinsic component of membrane//membrane part//integral component of membrane	GO:1901363//GO:0003676//GO:0003824//GO:0016788//GO:0004523//GO:0097159//GO:0004518//GO:0016787//GO:0003674//GO:0016891//GO:0004521//GO:0004519//GO:0005488//GO:0016893//GO:0004540	heterocyclic compound binding//nucleic acid binding//catalytic activity//hydrolase activity, acting on ester bonds//RNA-DNA hybrid ribonuclease activity//organic cyclic compound binding//nuclease activity//hydrolase activity//molecular_function//endoribonuclease activity, producing 5'-phosphomonoesters//endoribonuclease activity//endonuclease activity//binding//endonuclease activity, active with …	--	--	--	PREDICTED: uncharacterized protein LOC104220529 [Nicotiana sylvestris]
29	Novel00484	47.6104	8.73207	2.4469	0.00074039	0.0031554	UP	--	--	GO:0044444//GO:0005623//GO:0005622//GO:0031224//GO:0012505//GO:0044464//GO:0044425//GO:0044424//GO:0016021//GO:0043229//GO:0005783//GO:0043226//GO:0005737//GO:0005575//GO:0043231//GO:0016020//GO:0043227	cytoplasmic part//cell//intracellular//intrinsic component of membrane//endomembrane system//cell part//membrane part//intracellular part//integral component of membrane//intracellular organelle//endoplasmic reticulum//organelle//cytoplasm//cellular_component//intracellular membrane-bounded organelle//membrane//membrane-bounded organelle	GO:0005543//GO:0043169//GO:0005488//GO:0043168//GO:0005544//GO:0046872//GO:0016758//GO:0016740//GO:0003824//GO:0008289//GO:0005509//GO:0003674//GO:0016757//GO:0043167	phospholipid binding//cation binding//binding//anion binding//calcium-dependent phospholipid binding//metal ion binding//transferase activity, transferring hexosyl groups//transferase activity//catalytic activity//lipid binding//calcium ion binding//molecular_function//transferase activity, transferring glycosyl groups//ion binding	K20000 maturase K | (RefSeq) matK, SotuCp002; maturase K	http://www.genome.jp/dbget-bin/www_bget?sot:4099949	--	maturase K (chloroplast) [Solanum tuberosum]>gi|329124650|gb|AEB72206.1| maturase K (chloroplast) [Solanum tuberosum]
30	Novel00493	60.2384	22.9211	1.394	0.014692	0.041013	UP	--	--	--	--	--	--	--	--	--	--
31	Novel00494	754.025	298.671	1.3361	0.00012842	0.00067974	UP	--	--	--	--	--	--	--	--	--	--
32	Novel00496	59.7374	22.3544	1.4181	0.015746	0.043572	UP	--	--	--	--	--	--	--	--	--	PREDICTED: uncharacterized protein LOC102594572 [Solanum tuberosum]
33	Novel00499	157.435	59.8463	1.3954	0.0030527	0.010718	UP	GO:0007420//GO:0007417//GO:0030902//GO:0048869//GO:0048699//GO:0009987//GO:0030154//GO:0060322//GO:0032502//GO:0008150//GO:0048731//GO:0021549//GO:0032501//GO:0022008//GO:0048856//GO:0022037//GO:0030182//GO:0048513//GO:0007399//GO:0007275	brain development//central nervous system development//hindbrain development//cellular developmental process//generation of neurons//cellular process//cell differentiation//head development//developmental process//biological_process//system development//cerebellum development//multicellular organismal process//neurogenesis//anatomical structure development//metencephalon development//neuron diffe…	--	--	--	--	--	--	--	PREDICTED: uncharacterized protein LOC102594572 [Solanum tuberosum]
34	Novel00503	80.5539	16.3079	2.3044	2.4773e-05	0.00015745	UP	GO:0015980//GO:0006163//GO:0009126//GO:0046128//GO:0009199//GO:1901564//GO:0008150//GO:1901657//GO:0042775//GO:0044281//GO:0009987//GO:0055114//GO:0019637//GO:0006796//GO:0008152//GO:0022904//GO:0009144//GO:0009141//GO:0006793//GO:0006725//GO:0009123//GO:0071704//GO:0009117//GO:0022900//GO:0055086//GO:0046034//GO:0006091//GO:0072521//GO:0009116//GO:1901135//GO:0009119//GO:0034641//GO:0019693//GO:…	energy derivation by oxidation of organic compounds//purine nucleotide metabolic process//purine nucleoside monophosphate metabolic process//purine ribonucleoside metabolic process//ribonucleoside triphosphate metabolic process//organonitrogen compound metabolic process//biological_process//glycosyl compound metabolic process//mitochondrial ATP synthesis coupled electron transport//small molecule…	GO:0098798//GO:0070069//GO:0098803//GO:0005743//GO:0070469//GO:0098796//GO:0031975//GO:0005740//GO:0098800//GO:0045275//GO:0005746//GO:0043226//GO:0005737//GO:1902494//GO:0016020//GO:0043227//GO:0005739//GO:0032991//GO:0044429//GO:0005575//GO:0043231//GO:0044444//GO:0005623//GO:0019866//GO:0031967//GO:0031224//GO:0044464//GO:0044455//GO:1990204//GO:0005622//GO:0005750//GO:1990351//GO:0044425//GO:…	mitochondrial protein complex//cytochrome complex//respiratory chain complex//mitochondrial inner membrane//respiratory chain//membrane protein complex//envelope//mitochondrial envelope//inner mitochondrial membrane protein complex//respiratory chain complex III//mitochondrial respiratory chain//organelle//cytoplasm//catalytic complex//membrane//membrane-bounded organelle//mitochondrion//protein-…	--	--	K10400 kinesin family member 15 | (RefSeq) phragmoplast orienting kinesin-1	http://www.genome.jp/dbget-bin/www_bget?sot:102583007	--	PREDICTED: phragmoplast orienting kinesin 1-like [Solanum tuberosum]
35	Novel00509	39.0266	9.02294	2.1128	0.0041672	0.013987	UP	--	--	--	--	--	--	--	--	--	--
36	Novel00513	1218.61	552.359	1.1416	7.2166e-06	5.2141e-05	UP	--	--	--	--	--	--	no KO assigned | (RefSeq) haloacid dehalogenase-like hydrolase domain-containing protein 3	http://www.genome.jp/dbget-bin/www_bget?sot:102605740	--	PREDICTED: haloacid dehalogenase-like hydrolase domain-containing protein 3-like [Solanum tuberosum]
37	Novel00535	229.892	108.936	1.0775	0.0014031	0.0054962	UP	GO:0006468//GO:0044238//GO:0036211//GO:0019538//GO:0044267//GO:0043170//GO:0016310//GO:0006464//GO:0044237//GO:0009987//GO:0006796//GO:0043412//GO:0008150//GO:0071704//GO:0044260//GO:0008152//GO:0006793	protein phosphorylation//primary metabolic process//protein modification process//protein metabolic process//cellular protein metabolic process//macromolecule metabolic process//phosphorylation//cellular protein modification process//cellular metabolic process//cellular process//phosphate-containing compound metabolic process//macromolecule modification//biological_process//organic substance meta…	--	--	GO:0016773//GO:0004713//GO:0000166//GO:0001883//GO:0004672//GO:0001882//GO:0016772//GO:0097367//GO:1901265//GO:0017076//GO:0004715//GO:0043168//GO:0005488//GO:0032549//GO:0032559//GO:0097159//GO:1901363//GO:0003824//GO:0030554//GO:0016740//GO:0043167//GO:0003674//GO:0036094//GO:0016301//GO:0032553//GO:0005524//GO:0035639//GO:0032555//GO:0032550	phosphotransferase activity, alcohol group as acceptor//protein tyrosine kinase activity//nucleotide binding//purine nucleoside binding//protein kinase activity//nucleoside binding//transferase activity, transferring phosphorus-containing groups//carbohydrate derivative binding//nucleoside phosphate binding//purine nucleotide binding//non-membrane spanning protein tyrosine kinase activity//anion …	no KO assigned | (RefSeq) protein GAMETE EXPRESSED 2	http://www.genome.jp/dbget-bin/www_bget?sot:102589503	--	PREDICTED: protein GAMETE EXPRESSED 2-like isoform X2 [Solanum tuberosum]
38	Novel00552	120.434	53.1289	1.1807	0.0045896	0.015178	UP	GO:0051179//GO:0006891//GO:0016192//GO:0048193//GO:0046907//GO:0008150//GO:0006810//GO:0051234//GO:0051649//GO:0051641	localization//intra-Golgi vesicle-mediated transport//vesicle-mediated transport//Golgi vesicle transport//intracellular transport//biological_process//transport//establishment of localization//establishment of localization in cell//cellular localization	GO:0044464//GO:0012505//GO:0005622//GO:0005623//GO:0044444//GO:0044422//GO:0043229//GO:0044446//GO:0044424//GO:0043226//GO:0044431//GO:0017119//GO:0032991//GO:0043227//GO:0005575//GO:0043231//GO:0005737//GO:0005794	cell part//endomembrane system//intracellular//cell//cytoplasmic part//organelle part//intracellular organelle//intracellular organelle part//intracellular part//organelle//Golgi apparatus part//Golgi transport complex//protein-containing complex//membrane-bounded organelle//cellular_component//intracellular membrane-bounded organelle//cytoplasm//Golgi apparatus	GO:0004674//GO:0016773//GO:0005515//GO:0008134//GO:0008384//GO:0046983//GO:0004672//GO:0016772//GO:0042802//GO:0005488//GO:0003824//GO:0016740//GO:0003674//GO:0016301//GO:0042803	protein serine/threonine kinase activity//phosphotransferase activity, alcohol group as acceptor//protein binding//transcription factor binding//IkappaB kinase activity//protein dimerization activity//protein kinase activity//transferase activity, transferring phosphorus-containing groups//identical protein binding//binding//catalytic activity//transferase activity//molecular_function//kinase act…	K20296 vacuolar protein sorting-associated protein 51 | (RefSeq) vacuolar protein sorting-associated protein 51 homolog	http://www.genome.jp/dbget-bin/www_bget?sot:102601156	--	PREDICTED: vacuolar protein sorting-associated protein 51 homolog [Solanum tuberosum]
39	Novel00557	30.1771	2.76185	3.4497	0.00085298	0.0035717	UP	--	--	--	--	--	--	--	--	--	--
40	Novel00563	1016.92	266.299	1.9331	3.7629e-06	2.9252e-05	UP	--	--	--	--	--	--	no KO assigned | (RefSeq) uncharacterized LOC102601920	http://www.genome.jp/dbget-bin/www_bget?sot:102601920	--	PREDICTED: uncharacterized protein LOC102601920 isoform X1 [Solanum tuberosum]>gi|565399834|ref|XP_006365447.1| PREDICTED: uncharacterized protein LOC102601920 isoform X2 [Solanum tuberosum]
41	Novel00565	2291.45	724.812	1.6606	1.1e-11	2.6811e-10	UP	--	--	--	--	--	--	no KO assigned | (RefSeq) paladin	http://www.genome.jp/dbget-bin/www_bget?sot:102603371	--	PREDICTED: paladin-like isoform X1 [Solanum tuberosum]
42	Novel00569	2942.07	639.201	2.2025	5.3068e-19	3.8805e-17	UP	--	--	--	--	--	--	no KO assigned | (RefSeq) uncharacterized LOC102606059	http://www.genome.jp/dbget-bin/www_bget?sot:102606059	--	PREDICTED: uncharacterized protein LOC102606059 [Solanum tuberosum]
43	Novel00583	322.896	31.2006	3.3714	4.3821e-20	3.634e-18	UP	--	--	--	--	GO:1901363//GO:0003676//GO:0003824//GO:0030554//GO:0097159//GO:0005524//GO:0032553//GO:0032555//GO:0035639//GO:0016787//GO:0032550//GO:0043167//GO:0036094//GO:0003674//GO:0000166//GO:0003677//GO:0001883//GO:0001882//GO:0043168//GO:0005488//GO:0032549//GO:0032559//GO:0097367//GO:1901265//GO:0017076	heterocyclic compound binding//nucleic acid binding//catalytic activity//adenyl nucleotide binding//organic cyclic compound binding//ATP binding//ribonucleotide binding//purine ribonucleotide binding//purine ribonucleoside triphosphate binding//hydrolase activity//purine ribonucleoside binding//ion binding//small molecule binding//molecular_function//nucleotide binding//DNA binding//purine nucleo…	K10742 DNA replication ATP-dependent helicase Dna2 [EC:3.6.4.12] | (RefSeq) DNA replication ATP-dependent helicase/nuclease DNA2	http://www.genome.jp/dbget-bin/www_bget?sot:102578342	--	PREDICTED: DNA replication ATP-dependent helicase/nuclease DNA2-like [Solanum tuberosum]
44	Novel00649	245.593	79.1602	1.6334	3.4076e-06	2.6798e-05	UP	--	--	--	--	--	--	no KO assigned | (RefSeq) QWRF motif-containing protein 2	http://www.genome.jp/dbget-bin/www_bget?sot:102590637	--	PREDICTED: QWRF motif-containing protein 2-like [Solanum lycopersicum]
45	Novel00663	68.4888	8.32063	3.0411	2.1714e-06	1.7863e-05	UP	--	--	--	--	--	--	--	--	--	--
46	Novel00676	841.306	304.006	1.4685	3.7741e-08	4.6148e-07	UP	--	--	--	--	GO:0003824//GO:0016740//GO:0003674//GO:0016772	catalytic activity//transferase activity//molecular_function//transferase activity, transferring phosphorus-containing groups	K17496 mitochondrial import inner membrane translocase subunit TIM50 | (RefSeq) mitochondrial import inner membrane translocase subunit TIM50-like	http://www.genome.jp/dbget-bin/www_bget?sot:102600826	--	PREDICTED: mitochondrial import inner membrane translocase subunit TIM50-like [Solanum tuberosum]
47	Novel00685	14690.7	6773.58	1.1169	8.5645e-07	7.8186e-06	UP	--	--	--	--	GO:0003674//GO:0003676//GO:1901363//GO:0043565//GO:0097159//GO:0005488//GO:0003677	molecular_function//nucleic acid binding//heterocyclic compound binding//sequence-specific DNA binding//organic cyclic compound binding//binding//DNA binding	K03627 putative transcription factor | (RefSeq) multiprotein bridging factor 1	http://www.genome.jp/dbget-bin/www_bget?sot:102577581	--	transcriptional coactivator multiprotein bridging factor [Solanum lycopersicum]>gi|117574665|gb|ABK41200.1| transcriptional coactivator multiprotein bridging factor [Solanum lycopersicum]
48	Novel00690	43.6747	11.8274	1.8847	0.00583	0.018632	UP	--	--	--	--	--	--	--	--	--	--
49	Novel00712	53.7105	19.6926	1.4475	0.014009	0.039388	UP	--	--	--	--	GO:0005488//GO:0046872//GO:0046914//GO:0043169//GO:0008270//GO:0003674//GO:0043167//GO:1901363//GO:0003676//GO:0097159	binding//metal ion binding//transition metal ion binding//cation binding//zinc ion binding//molecular_function//ion binding//heterocyclic compound binding//nucleic acid binding//organic cyclic compound binding	--	--	--	PREDICTED: uncharacterized protein LOC104089897 [Nicotiana tomentosiformis]
50	Novel00733	136.606	15.8314	3.1092	9.5017e-11	1.9508e-09	UP	--	--	--	--	--	--	--	--	--	PREDICTED: craniofacial development protein 2-like [Nicotiana tomentosiformis]
51	Novel00737	117.607	30.8562	1.9303	0.00012059	0.00064284	UP	GO:0008150//GO:0008152	biological_process//metabolic process	--	--	GO:0003824//GO:0016787//GO:0003674	catalytic activity//hydrolase activity//molecular_function	no KO assigned | (RefSeq) probable carboxylesterase 18	http://www.genome.jp/dbget-bin/www_bget?sot:102589536	--	PREDICTED: probable carboxylesterase 18-like [Solanum tuberosum]
52	Novel00749	131.308	24.4381	2.4258	1.1072e-07	1.2174e-06	UP	--	--	GO:0016020//GO:0005575//GO:0031224//GO:0044425//GO:0016021	membrane//cellular_component//intrinsic component of membrane//membrane part//integral component of membrane	--	--	no KO assigned | (RefSeq) WAT1-related protein At4g19185-like	http://www.genome.jp/dbget-bin/www_bget?sot:102580801	--	PREDICTED: uncharacterized protein LOC104230325, partial [Nicotiana sylvestris]
53	Novel00755	63.0503	19.757	1.6741	0.0039372	0.013342	UP	--	--	--	--	--	--	K15166 mediator of RNA polymerase II transcription subunit 23 | (RefSeq) mediator of RNA polymerase II transcription subunit 23	http://www.genome.jp/dbget-bin/www_bget?sot:102586283	--	PREDICTED: mediator of RNA polymerase II transcription subunit 23-like [Solanum tuberosum]
54	Novel00772	15.6833	1.69546	3.2095	0.01573	0.043537	UP	GO:0008152//GO:0008150	metabolic process//biological_process	--	--	GO:0003674//GO:0016757//GO:0003824//GO:0016740//GO:0016758	molecular_function//transferase activity, transferring glycosyl groups//catalytic activity//transferase activity//transferase activity, transferring hexosyl groups	K13496 UDP-glucosyl transferase 73C [EC:2.4.1.-] | (RefSeq) UDP-glycosyltransferase 73C3-like	http://www.genome.jp/dbget-bin/www_bget?sot:102603165	--	PREDICTED: UDP-glycosyltransferase 73C3-like [Solanum tuberosum]
55	Novel00774	88.87	0.97954	6.5034	1.0975e-08	1.5001e-07	UP	GO:0008152//GO:0008150	metabolic process//biological_process	--	--	GO:0016758//GO:0016757//GO:0003674//GO:0003824//GO:0016740	transferase activity, transferring hexosyl groups//transferase activity, transferring glycosyl groups//molecular_function//catalytic activity//transferase activity	K13496 UDP-glucosyl transferase 73C [EC:2.4.1.-] | (RefSeq) UDP-glycosyltransferase 73C3-like	http://www.genome.jp/dbget-bin/www_bget?sot:102603165	--	PREDICTED: UDP-glycosyltransferase 73C3-like [Solanum tuberosum]
56	Novel00784	16.9424	0.30619	5.7901	0.0007698	0.0032611	UP	--	--	--	--	--	--	K01674 carbonic anhydrase [EC:4.2.1.1] | (RefSeq) alpha carbonic anhydrase 7-like	http://www.genome.jp/dbget-bin/www_bget?sot:102589383	--	PREDICTED: bifunctional monodehydroascorbate reductase and carbonic anhydrase nectarin-3-like [Solanum tuberosum]
57	Novel00791	53.8376	7.25633	2.8913	4.2061e-05	0.00025247	UP	--	--	--	--	--	--	--	--	--	--
58	Novel00797	110.321	7.90785	3.8023	6.4374e-12	1.6237e-10	UP	GO:0006807//GO:0046483//GO:0044238//GO:0034641//GO:1901360//GO:0006139//GO:0044237//GO:0009987//GO:0008150//GO:0071704//GO:0006725//GO:0008152	nitrogen compound metabolic process//heterocycle metabolic process//primary metabolic process//cellular nitrogen compound metabolic process//organic cyclic compound metabolic process//nucleobase-containing compound metabolic process//cellular metabolic process//cellular process//biological_process//organic substance metabolic process//cellular aromatic compound metabolic process//metabolic process	--	--	GO:0046914//GO:0017111//GO:0043169//GO:0001882//GO:0000166//GO:0016887//GO:0001883//GO:0017076//GO:0046870//GO:0046872//GO:0097367//GO:1901265//GO:0005488//GO:0042623//GO:0032559//GO:0032549//GO:0016817//GO:0008026//GO:0043168//GO:0016462//GO:0004386//GO:0097159//GO:0003676//GO:1901363//GO:0030554//GO:0003824//GO:0070035//GO:0003674//GO:0036094//GO:0016818//GO:0043167//GO:0035639//GO:0032555//GO:…	transition metal ion binding//nucleoside-triphosphatase activity//cation binding//nucleoside binding//nucleotide binding//ATPase activity//purine nucleoside binding//purine nucleotide binding//cadmium ion binding//metal ion binding//carbohydrate derivative binding//nucleoside phosphate binding//binding//ATPase activity, coupled//adenyl ribonucleotide binding//ribonucleoside binding//hydrolase act…	K15362 fanconi anemia group J protein [EC:3.6.4.12] | (RefSeq) Fanconi anemia group J protein homolog	http://www.genome.jp/dbget-bin/www_bget?sot:102582880	--	PREDICTED: Fanconi anemia group J protein homolog, partial [Solanum tuberosum]
59	Novel00803	1463.27	471.273	1.6346	4.4661e-06	3.405e-05	UP	--	--	--	--	--	--	K12606 CCR4-NOT transcription complex subunit 9 | (RefSeq) cell differentiation protein RCD1 homolog	http://www.genome.jp/dbget-bin/www_bget?sot:102605200	--	PREDICTED: cell differentiation protein RCD1 homolog [Solanum tuberosum]
60	Novel00812	285.062	65.4494	2.1228	1.1442e-09	1.9138e-08	UP	--	--	--	--	--	--	--	--	--	unnamed protein product [Coffea canephora]
61	Novel00820	84.7903	9.2392	3.1981	7.9218e-08	9.0108e-07	UP	--	--	--	--	GO:0043169//GO:0046872//GO:0005488//GO:0043167//GO:0003674	cation binding//metal ion binding//binding//ion binding//molecular_function	--	--	--	--
62	Novel00830	35.7732	1.84941	4.2737	1.7423e-05	0.00011457	UP	GO:0070727//GO:0015031//GO:0006886//GO:0045184//GO:0051179//GO:0008104//GO:0016192//GO:0051234//GO:0006810//GO:0008150//GO:0046907//GO:0051641//GO:0071702//GO:0051649//GO:0034613//GO:0033036	cellular macromolecule localization//protein transport//intracellular protein transport//establishment of protein localization//localization//protein localization//vesicle-mediated transport//establishment of localization//transport//biological_process//intracellular transport//cellular localization//organic substance transport//establishment of localization in cell//cellular protein localization…	GO:0044444//GO:0005623//GO:0048475//GO:0044464//GO:0005622//GO:0044425//GO:0044424//GO:0030118//GO:0030119//GO:0030117//GO:0098796//GO:0030131//GO:0005737//GO:0016020//GO:0032991//GO:0005575	cytoplasmic part//cell//coated membrane//cell part//intracellular//membrane part//intracellular part//clathrin coat//AP-type membrane coat adaptor complex//membrane coat//membrane protein complex//clathrin adaptor complex//cytoplasm//membrane//protein-containing complex//cellular_component	--	--	--	--	--	PREDICTED: uncharacterized protein LOC102589791 [Solanum tuberosum]
63	Novel00834	325.19	138.542	1.231	0.00060576	0.002647	UP	GO:0006725//GO:0071704//GO:0044260//GO:0008152//GO:0006281//GO:0009987//GO:0033554//GO:0006298//GO:0008150//GO:0043170//GO:0006974//GO:0006950//GO:0051716//GO:0044237//GO:0006139//GO:1901360//GO:0090304//GO:0044238//GO:0046483//GO:0006807//GO:0050896//GO:0006259//GO:0034641	cellular aromatic compound metabolic process//organic substance metabolic process//cellular macromolecule metabolic process//metabolic process//DNA repair//cellular process//cellular response to stress//mismatch repair//biological_process//macromolecule metabolic process//cellular response to DNA damage stimulus//response to stress//cellular response to stimulus//cellular metabolic process//nucle…	--	--	GO:0043167//GO:0036094//GO:0003674//GO:0005524//GO:0032553//GO:0032550//GO:0032555//GO:0035639//GO:0097159//GO:0030554//GO:1901363//GO:0003676//GO:0003690//GO:1901265//GO:0097367//GO:0017076//GO:0043168//GO:0032549//GO:0032559//GO:0005488//GO:0030983//GO:0001883//GO:0000166//GO:0003677//GO:0001882	ion binding//small molecule binding//molecular_function//ATP binding//ribonucleotide binding//purine ribonucleoside binding//purine ribonucleotide binding//purine ribonucleoside triphosphate binding//organic cyclic compound binding//adenyl nucleotide binding//heterocyclic compound binding//nucleic acid binding//double-stranded DNA binding//nucleoside phosphate binding//carbohydrate derivative bin…	K08741 DNA mismatch repair protein MSH5 | (RefSeq) DNA mismatch repair protein MSH5	http://www.genome.jp/dbget-bin/www_bget?sot:102603553	--	PREDICTED: DNA mismatch repair protein MSH5-like [Solanum tuberosum]
64	Novel00846	231.24	89.8238	1.3642	0.002535	0.0091591	UP	GO:0008150//GO:0044249//GO:0009987//GO:0008152//GO:0009404//GO:0019748//GO:0009058//GO:0009403//GO:0044550//GO:0044237	biological_process//cellular biosynthetic process//cellular process//metabolic process//toxin metabolic process//secondary metabolic process//biosynthetic process//toxin biosynthetic process//secondary metabolite biosynthetic process//cellular metabolic process	GO:0005783//GO:0043226//GO:0005737//GO:0005575//GO:0043231//GO:0043227//GO:0016020//GO:0005623//GO:0044444//GO:0005622//GO:0012505//GO:0044464//GO:0044424//GO:0043229	endoplasmic reticulum//organelle//cytoplasm//cellular_component//intracellular membrane-bounded organelle//membrane-bounded organelle//membrane//cell//cytoplasmic part//intracellular//endomembrane system//cell part//intracellular part//intracellular organelle	--	--	no KO assigned | (RefSeq) uncharacterized LOC102588951	http://www.genome.jp/dbget-bin/www_bget?sot:102588951	--	PREDICTED: uncharacterized protein LOC102588951 [Solanum tuberosum]
65	Novel00847	102.239	26.2844	1.9597	8.4345e-05	0.00046892	UP	GO:0008150//GO:0055114//GO:0008152	biological_process//oxidation-reduction process//metabolic process	--	--	GO:0016972//GO:0016667//GO:0003824//GO:0016491//GO:0016670//GO:0003674	thiol oxidase activity//oxidoreductase activity, acting on a sulfur group of donors//catalytic activity//oxidoreductase activity//oxidoreductase activity, acting on a sulfur group of donors, oxygen as acceptor//molecular_function	--	--	--	PREDICTED: uncharacterized protein LOC102594572 [Solanum tuberosum]
66	Novel00854	176.627	54.8168	1.688	1.5666e-05	0.00010421	UP	--	--	--	--	--	--	no KO assigned | (RefSeq) glycosyltransferase-like KOBITO 1	http://www.genome.jp/dbget-bin/www_bget?sot:102579034	--	PREDICTED: uncharacterized protein LOC104217531 [Nicotiana sylvestris]
67	Novel00869	117.432	46.1409	1.3477	0.0019144	0.0071916	UP	--	--	--	--	--	--	--	--	--	PREDICTED: uncharacterized protein LOC104110207 [Nicotiana tomentosiformis]
68	Novel00872	313.318	132.548	1.2411	0.00010261	0.00055601	UP	GO:0008150//GO:0008152	biological_process//metabolic process	--	--	GO:0003824//GO:0003674	catalytic activity//molecular_function	K17623 pseudouridine 5'-phosphatase [EC:3.1.3.96] | (RefSeq) (DL)-glycerol-3-phosphatase 2-like	http://www.genome.jp/dbget-bin/www_bget?sot:102605138	--	PREDICTED: (DL)-glycerol-3-phosphatase 1-like [Solanum tuberosum]
69	Novel00890	143.557	70.2332	1.0314	0.0078981	0.024188	UP	--	--	--	--	--	--	--	--	--	--
70	Novel00899	1101.3	260.902	2.0776	7.6252e-15	3.0063e-13	UP	GO:0051234//GO:0006810//GO:0008150//GO:0051179	establishment of localization//transport//biological_process//localization	GO:0016020//GO:0005575	membrane//cellular_component	GO:0003674//GO:0005215	molecular_function//transporter activity	K14638 solute carrier family 15 (peptide/histidine transporter), member 3/4 | (RefSeq) protein NRT1/ PTR FAMILY 2.3-like	http://www.genome.jp/dbget-bin/www_bget?sot:102582054	--	PREDICTED: probable nitrate excretion transporter 3-like [Solanum tuberosum]
71	Novel00918	62.9021	0	Inf	1.4662e-06	1.2594e-05	UP	GO:0051179//GO:0070838//GO:0006812//GO:0006811//GO:0072511//GO:0008150//GO:0006810//GO:0051234//GO:0030001//GO:0015693	localization//divalent metal ion transport//cation transport//ion transport//divalent inorganic cation transport//biological_process//transport//establishment of localization//metal ion transport//magnesium ion transport	GO:0031224//GO:0044425//GO:0016021//GO:0005575//GO:0016020	intrinsic component of membrane//membrane part//integral component of membrane//cellular_component//membrane	GO:0022890//GO:0015095//GO:0008324//GO:0015075//GO:0005215//GO:0046873//GO:0022857//GO:0072509//GO:0003674	inorganic cation transmembrane transporter activity//magnesium ion transmembrane transporter activity//cation transmembrane transporter activity//ion transmembrane transporter activity//transporter activity//metal ion transmembrane transporter activity//transmembrane transporter activity//divalent inorganic cation transmembrane transporter activity//molecular_function	no KO assigned | (RefSeq) WAT1-related protein At5g07050-like	http://www.genome.jp/dbget-bin/www_bget?sot:102592276	--	PREDICTED: WAT1-related protein At5g07050-like, partial [Solanum tuberosum]
72	Novel00929	70.0567	2.82895	4.6302	5.3841e-10	9.6699e-09	UP	GO:0055074//GO:0006812//GO:0055080//GO:0006811//GO:0072503//GO:0006874//GO:0030003//GO:0055065//GO:0050801//GO:0065007//GO:0051179//GO:0006873//GO:0042592//GO:0006875//GO:0065008//GO:0048878//GO:0051234//GO:0055082//GO:0006810//GO:0072507//GO:0008150//GO:0030001//GO:0098771//GO:0009987//GO:0019725	calcium ion homeostasis//cation transport//cation homeostasis//ion transport//cellular divalent inorganic cation homeostasis//cellular calcium ion homeostasis//cellular cation homeostasis//metal ion homeostasis//ion homeostasis//biological regulation//localization//cellular ion homeostasis//homeostatic process//cellular metal ion homeostasis//regulation of biological quality//chemical homeostasis…	GO:0044425//GO:0016021//GO:0031224//GO:0005575//GO:0016020	membrane part//integral component of membrane//intrinsic component of membrane//cellular_component//membrane	GO:0015085//GO:0005488//GO:0046872//GO:0022890//GO:0008324//GO:0015075//GO:0022838//GO:0005215//GO:0046873//GO:0015276//GO:0005261//GO:0043169//GO:0015267//GO:0022836//GO:0015278//GO:0003674//GO:0022834//GO:0005216//GO:0043167//GO:0022857//GO:0005217//GO:0005262//GO:0005219//GO:0022803//GO:0072509	calcium ion transmembrane transporter activity//binding//metal ion binding//inorganic cation transmembrane transporter activity//cation transmembrane transporter activity//ion transmembrane transporter activity//substrate-specific channel activity//transporter activity//metal ion transmembrane transporter activity//ligand-gated ion channel activity//cation channel activity//cation binding//channe…	no KO assigned | (RefSeq) pollen-specific leucine-rich repeat extensin-like protein 2	http://www.genome.jp/dbget-bin/www_bget?sot:102587296	--	PREDICTED: protein TsetseEP-like [Solanum tuberosum]
73	Novel00948	154.265	72.9325	1.0808	0.0042703	0.014283	UP	--	--	--	--	--	--	--	--	--	--
74	Novel00958	101.412	34.5115	1.5551	0.00079138	0.0033406	UP	GO:0044281//GO:1901362//GO:0080090//GO:0051171//GO:0009987//GO:0006082//GO:0019438//GO:2000112//GO:1901564//GO:0008150//GO:0031326//GO:0006810//GO:0051234//GO:0006355//GO:0050789//GO:0031323//GO:0044249//GO:0009889//GO:0006725//GO:0097659//GO:0071704//GO:0006351//GO:0034645//GO:1901605//GO:0006520//GO:0044260//GO:1901576//GO:2001141//GO:0008152//GO:0051252//GO:0006575//GO:1903506//GO:0007155//GO:…	small molecule metabolic process//organic cyclic compound biosynthetic process//regulation of primary metabolic process//regulation of nitrogen compound metabolic process//cellular process//organic acid metabolic process//aromatic compound biosynthetic process//regulation of cellular macromolecule biosynthetic process//organonitrogen compound metabolic process//biological_process//regulation of c…	GO:0043226//GO:0044430//GO:0005856//GO:0016020//GO:0032991//GO:0005575//GO:0015629//GO:0031224//GO:0044464//GO:0005622//GO:0005623//GO:0043228//GO:0016459//GO:0043229//GO:0044446//GO:0044422//GO:0016021//GO:0044425//GO:0044424//GO:0043232	organelle//cytoskeletal part//cytoskeleton//membrane//protein-containing complex//cellular_component//actin cytoskeleton//intrinsic component of membrane//cell part//intracellular//cell//non-membrane-bounded organelle//myosin complex//intracellular organelle//intracellular organelle part//organelle part//integral component of membrane//membrane part//intracellular part//intracellular non-membrane…	GO:0097159//GO:0016462//GO:0030554//GO:0003824//GO:1901363//GO:0043167//GO:0003700//GO:0036094//GO:0016818//GO:0003674//GO:0004150//GO:0005524//GO:0032553//GO:0016829//GO:0032550//GO:0016787//GO:0032555//GO:0035639//GO:0017111//GO:0016830//GO:0005515//GO:0001883//GO:0000166//GO:0001882//GO:1901265//GO:0097367//GO:0017076//GO:0043168//GO:0032559//GO:0032549//GO:0016817//GO:0016832//GO:0005488//GO:…	organic cyclic compound binding//pyrophosphatase activity//adenyl nucleotide binding//catalytic activity//heterocyclic compound binding//ion binding//DNA-binding transcription factor activity//small molecule binding//hydrolase activity, acting on acid anhydrides, in phosphorus-containing anhydrides//molecular_function//dihydroneopterin aldolase activity//ATP binding//ribonucleotide binding//lyase…	K10357 myosin V | (RefSeq) myosin-11	http://www.genome.jp/dbget-bin/www_bget?sot:102601504	--	PREDICTED: myosin-11-like [Solanum tuberosum]
75	Novel00969	702.618	330.6	1.0877	4.6358e-05	0.00027537	UP	--	--	--	--	--	--	K18159 NADH dehydrogenase [ubiquinone] 1 alpha subcomplex assembly factor 1 | (RefSeq) probable complex I intermediate-associated protein 30	http://www.genome.jp/dbget-bin/www_bget?sot:102579116	--	PREDICTED: probable complex I intermediate-associated protein 30-like isoform X1 [Solanum tuberosum]>gi|565368996|ref|XP_006351124.1| PREDICTED: probable complex I intermediate-associated protein 30-like isoform X2 [Solanum tuberosum]
76	Novel00984	29.0585	5.09422	2.512	0.0059801	0.019043	UP	--	--	--	--	--	--	--	--	--	--
77	Novel00987	316.712	155.032	1.0306	0.00097564	0.004014	UP	GO:1901576//GO:0044260//GO:2001141//GO:0071704//GO:0097659//GO:0006351//GO:0034645//GO:0006725//GO:1903506//GO:0051252//GO:0008152//GO:0051171//GO:0009987//GO:0080090//GO:1901362//GO:0009889//GO:0050789//GO:0031323//GO:0044249//GO:0031326//GO:0008150//GO:0006355//GO:2000112//GO:0019438//GO:0019219//GO:0009059//GO:0043170//GO:0019222//GO:0006139//GO:1901360//GO:0044271//GO:0044237//GO:0006950//GO:…	organic substance biosynthetic process//cellular macromolecule metabolic process//regulation of RNA biosynthetic process//organic substance metabolic process//nucleic acid-templated transcription//transcription, DNA-templated//cellular macromolecule biosynthetic process//cellular aromatic compound metabolic process//regulation of nucleic acid-templated transcription//regulation of RNA metabolic p…	GO:0005575//GO:0005576	cellular_component//extracellular region	--	--	--	--	--	--
78	Novel01009	5782.85	2001.86	1.5304	7.5388e-11	1.5695e-09	UP	GO:0006811//GO:0006812//GO:0051179//GO:0030001//GO:0008150//GO:0051234//GO:0006810	ion transport//cation transport//localization//metal ion transport//biological_process//establishment of localization//transport	--	--	GO:1901265//GO:0046872//GO:0005488//GO:0043169//GO:0000166//GO:0043167//GO:0003674//GO:0036094//GO:0097159//GO:1901363	nucleoside phosphate binding//metal ion binding//binding//cation binding//nucleotide binding//ion binding//molecular_function//small molecule binding//organic cyclic compound binding//heterocyclic compound binding	K17686 Cu+-exporting ATPase [EC:3.6.3.54] | (RefSeq) probable copper-transporting ATPase HMA5	http://www.genome.jp/dbget-bin/www_bget?sot:102583551	--	PREDICTED: probable copper-transporting ATPase HMA5-like [Solanum tuberosum]
79	Novel01030	830.311	232.413	1.837	2.0175e-11	4.7088e-10	UP	--	--	--	--	--	--	--	--	--	--
80	Novel01042	123.073	18.0282	2.7712	2.807e-08	3.5296e-07	UP	--	--	--	--	--	--	--	--	--	PREDICTED: apoptosis-inducing factor homolog B-like [Solanum tuberosum]
81	Novel01086	80.2102	18.7052	2.1003	0.00073335	0.0031281	UP	--	--	--	--	GO:0097159//GO:0003676//GO:1901363//GO:0003674//GO:0005488	organic cyclic compound binding//nucleic acid binding//heterocyclic compound binding//molecular_function//binding	no KO assigned | (RefSeq) uncharacterized LOC102602845	http://www.genome.jp/dbget-bin/www_bget?sot:102602845	--	PREDICTED: uncharacterized protein LOC104644442 [Solanum lycopersicum]
82	Novel01106	44.8159	0.361026	6.9558	9.401e-05	0.00051484	UP	GO:0050896//GO:0006950//GO:0055114//GO:0006979//GO:0008150//GO:0008152	response to stimulus//response to stress//oxidation-reduction process//response to oxidative stress//biological_process//metabolic process	--	--	GO:0016209//GO:0020037//GO:0005488//GO:0097159//GO:1901363//GO:0016684//GO:0003824//GO:0016491//GO:0003674//GO:0046906//GO:0004601	antioxidant activity//heme binding//binding//organic cyclic compound binding//heterocyclic compound binding//oxidoreductase activity, acting on peroxide as acceptor//catalytic activity//oxidoreductase activity//molecular_function//tetrapyrrole binding//peroxidase activity	K00430 peroxidase [EC:1.11.1.7] | (RefSeq) lignin-forming anionic peroxidase-like	http://www.genome.jp/dbget-bin/www_bget?sot:102599828	--	PREDICTED: lignin-forming anionic peroxidase-like [Solanum tuberosum]
83	Novel01113	88.5562	5.271	4.0704	3.2991e-05	0.00020392	UP	--	--	--	--	--	--	no KO assigned | (RefSeq) uncharacterized LOC102586991	http://www.genome.jp/dbget-bin/www_bget?sot:102586991	--	PREDICTED: uncharacterized protein LOC104121163 [Nicotiana tomentosiformis]
84	Novel01120	170.95	56.7629	1.5906	3.262e-05	0.00020188	UP	GO:0043603//GO:0051179//GO:0010467//GO:0009058//GO:0019538//GO:0006807//GO:0044238//GO:0007165//GO:0006412//GO:0034641//GO:0065007//GO:0050794//GO:0050896//GO:0044267//GO:0007218//GO:0009059//GO:0007154//GO:0043170//GO:0044271//GO:0007186//GO:0055085//GO:0043043//GO:0006812//GO:0044237//GO:0051716//GO:0006811//GO:0009987//GO:1901566//GO:0050789//GO:0044249//GO:1901564//GO:0008150//GO:0051234//GO:…	cellular amide metabolic process//localization//gene expression//biosynthetic process//protein metabolic process//nitrogen compound metabolic process//primary metabolic process//signal transduction//translation//cellular nitrogen compound metabolic process//biological regulation//regulation of cellular process//response to stimulus//cellular protein metabolic process//neuropeptide signaling pathw…	GO:0005576//GO:0005622//GO:0044464//GO:0015934//GO:0043228//GO:0005623//GO:0044444//GO:0044446//GO:0043229//GO:0044422//GO:0043232//GO:0044391//GO:0044424//GO:0043226//GO:0005575//GO:0032991//GO:0016020//GO:0005840//GO:0005737	extracellular region//intracellular//cell part//large ribosomal subunit//non-membrane-bounded organelle//cell//cytoplasmic part//intracellular organelle part//intracellular organelle//organelle part//intracellular non-membrane-bounded organelle//ribosomal subunit//intracellular part//organelle//cellular_component//protein-containing complex//membrane//ribosome//cytoplasm	GO:0005215//GO:0005515//GO:0003723//GO:0046873//GO:0005184//GO:0022890//GO:0008324//GO:0005179//GO:0015075//GO:0005488//GO:0008013//GO:0003735//GO:0097159//GO:0005198//GO:0022857//GO:1901363//GO:0005102//GO:0003676//GO:0003674	transporter activity//protein binding//RNA binding//metal ion transmembrane transporter activity//neuropeptide hormone activity//inorganic cation transmembrane transporter activity//cation transmembrane transporter activity//hormone activity//ion transmembrane transporter activity//binding//beta-catenin binding//structural constituent of ribosome//organic cyclic compound binding//structural molec…	--	--	--	PREDICTED: uncharacterized protein LOC104647107 [Solanum lycopersicum]
85	Novel01127	94.0188	35.9709	1.3861	0.0035934	0.012343	UP	--	--	--	--	--	--	no KO assigned | (RefSeq) uncharacterized LOC102595262	http://www.genome.jp/dbget-bin/www_bget?sot:102595262	--	PREDICTED: uncharacterized protein LOC102595262 [Solanum tuberosum]
86	Novel01150	240.824	61.1675	1.9771	4.6404e-07	4.4714e-06	UP	--	--	--	--	--	--	no KO assigned | (RefSeq) uncharacterized LOC102600430	http://www.genome.jp/dbget-bin/www_bget?sot:102600430	--	PREDICTED: uncharacterized protein LOC102600430 [Solanum tuberosum]
87	Novel01164	679.103	184.949	1.8765	3.3191e-11	7.4423e-10	UP	GO:0008150//GO:0009987//GO:0008152//GO:0006725//GO:0071704//GO:0015074//GO:0044260//GO:0006259//GO:0034641//GO:0090304//GO:0046483//GO:0044238//GO:0006807//GO:0044237//GO:0006139//GO:1901360//GO:0043170	biological_process//cellular process//metabolic process//cellular aromatic compound metabolic process//organic substance metabolic process//DNA integration//cellular macromolecule metabolic process//DNA metabolic process//cellular nitrogen compound metabolic process//nucleic acid metabolic process//heterocycle metabolic process//primary metabolic process//nitrogen compound metabolic process//cell…	--	--	GO:1901363//GO:0003676//GO:0097159//GO:0008270//GO:0043167//GO:0003674//GO:0043169//GO:0046914//GO:0005488//GO:0046872	heterocyclic compound binding//nucleic acid binding//organic cyclic compound binding//zinc ion binding//ion binding//molecular_function//cation binding//transition metal ion binding//binding//metal ion binding	no KO assigned | (RefSeq) uncharacterized LOC102593226	http://www.genome.jp/dbget-bin/www_bget?sot:102593226	--	PREDICTED: uncharacterized protein LOC101255821 [Solanum lycopersicum]
88	Novel01168	392.786	140.119	1.4871	9.7431e-07	8.7785e-06	UP	--	--	--	--	--	--	--	--	--	--
89	Novel01178	2480.88	644.155	1.9454	8.6489e-09	1.2095e-07	UP	GO:0008152//GO:0008150//GO:0055114	metabolic process//biological_process//oxidation-reduction process	GO:0044425//GO:0016021//GO:0031224//GO:0016020//GO:0005575	membrane part//integral component of membrane//intrinsic component of membrane//membrane//cellular_component	GO:0043168//GO:0004497//GO:0005488//GO:1901265//GO:0071949//GO:0048037//GO:0000166//GO:0016705//GO:0016709//GO:0043167//GO:0036094//GO:0003674//GO:0004506//GO:0003824//GO:1901363//GO:0016491//GO:0097159//GO:0050662//GO:0050660	anion binding//monooxygenase activity//binding//nucleoside phosphate binding//FAD binding//cofactor binding//nucleotide binding//oxidoreductase activity, acting on paired donors, with incorporation or reduction of molecular oxygen//oxidoreductase activity, acting on paired donors, with incorporation or reduction of molecular oxygen, NAD(P)H as one donor, and incorporation of one atom of oxygen//i…	no KO assigned | (RefSeq) FAD-dependent urate hydroxylase-like	http://www.genome.jp/dbget-bin/www_bget?sot:102589596	--	PREDICTED: zeaxanthin epoxidase, chloroplastic-like [Solanum tuberosum]
90	Novel01180	31.5328	7.27878	2.1151	0.0098444	0.029197	UP	GO:0051234//GO:0006810//GO:0008150//GO:0009987//GO:0055085//GO:0051179	establishment of localization//transport//biological_process//cellular process//transmembrane transport//localization	GO:0005575//GO:0016020//GO:0044425//GO:0016021//GO:0031224	cellular_component//membrane//membrane part//integral component of membrane//intrinsic component of membrane	--	--	K15280 solute carrier family 35, member C2 | (RefSeq) probable sugar phosphate/phosphate translocator At1g06470	http://www.genome.jp/dbget-bin/www_bget?sot:102596992	--	PREDICTED: probable sugar phosphate/phosphate translocator At1g06470-like [Solanum tuberosum]
91	Novel01229	254.294	109.628	1.2139	0.00027794	0.00135	UP	GO:0090304//GO:0046483//GO:0044238//GO:0009058//GO:0006807//GO:0010467//GO:0034654//GO:0060255//GO:0010556//GO:0018130//GO:0050794//GO:0065007//GO:0032774//GO:0010468//GO:0034641//GO:0016070//GO:0019222//GO:0043170//GO:0009059//GO:0019219//GO:0044237//GO:0044271//GO:1901360//GO:0006139//GO:1901362//GO:0080090//GO:0051171//GO:0009987//GO:0019438//GO:2000112//GO:0006355//GO:0008150//GO:0031326//GO:…	nucleic acid metabolic process//heterocycle metabolic process//primary metabolic process//biosynthetic process//nitrogen compound metabolic process//gene expression//nucleobase-containing compound biosynthetic process//regulation of macromolecule metabolic process//regulation of macromolecule biosynthetic process//heterocycle biosynthetic process//regulation of cellular process//biological regula…	GO:0044464//GO:0005622//GO:0005623//GO:0044424//GO:0005667//GO:0032991//GO:0005575	cell part//intracellular//cell//intracellular part//transcription factor complex//protein-containing complex//cellular_component	GO:0003700//GO:0003674	DNA-binding transcription factor activity//molecular_function	no KO assigned | (RefSeq) uncharacterized LOC102583133	http://www.genome.jp/dbget-bin/www_bget?sot:102583133	--	PREDICTED: uncharacterized protein LOC102583133 [Solanum tuberosum]
92	Novel01240	70.8653	7.67795	3.2063	7.08e-07	6.5685e-06	UP	--	--	--	--	--	--	--	--	--	PREDICTED: uncharacterized protein LOC104646748 [Solanum lycopersicum]>gi|723657265|ref|XP_010319460.1| PREDICTED: uncharacterized protein LOC104646748 [Solanum lycopersicum]
93	Novel01248	25.7697	3.58167	2.847	0.0040585	0.01368	UP	GO:0055114//GO:0008150//GO:0008152	oxidation-reduction process//biological_process//metabolic process	--	--	GO:0016491//GO:0003824//GO:0003674	oxidoreductase activity//catalytic activity//molecular_function	K00366 ferredoxin-nitrite reductase [EC:1.7.7.1] | (RefSeq) NIR; ferredoxin--nitrite reductase, chloroplastic	http://www.genome.jp/dbget-bin/www_bget?sot:102581851	--	PREDICTED: ferredoxin--nitrite reductase, chloroplastic [Solanum lycopersicum]
94	Novel01257	105.703	39.8182	1.4085	0.0017089	0.0065134	UP	--	--	--	--	--	--	no KO assigned | (RefSeq) uncharacterized LOC102598939	http://www.genome.jp/dbget-bin/www_bget?sot:102598939	--	PREDICTED: kinesin-like calmodulin-binding protein homolog [Solanum tuberosum]
95	Novel01271	186.784	65.3662	1.5148	4.8858e-05	0.00028854	UP	--	--	--	--	--	--	no KO assigned | (RefSeq) uncharacterized LOC102580802	http://www.genome.jp/dbget-bin/www_bget?sot:102580802	--	PREDICTED: uncharacterized protein LOC104093903 [Nicotiana tomentosiformis]
96	Novel01284	1680.05	740.693	1.1816	1.4427e-06	1.2426e-05	UP	GO:0071704//GO:0006725//GO:0044260//GO:0008152//GO:0006396//GO:0009987//GO:0008033//GO:0034660//GO:0008150//GO:0043170//GO:0006399//GO:0044237//GO:0006139//GO:1901360//GO:0044238//GO:0046483//GO:0090304//GO:0010467//GO:0006807//GO:0034470//GO:0034641//GO:0016070	organic substance metabolic process//cellular aromatic compound metabolic process//cellular macromolecule metabolic process//metabolic process//RNA processing//cellular process//tRNA processing//ncRNA metabolic process//biological_process//macromolecule metabolic process//tRNA metabolic process//cellular metabolic process//nucleobase-containing compound metabolic process//organic cyclic compound …	GO:0016020//GO:0005575//GO:0016021//GO:0044425//GO:0031224	membrane//cellular_component//integral component of membrane//membrane part//intrinsic component of membrane	GO:0008168//GO:0003674//GO:0016741//GO:0003824//GO:0016740	methyltransferase activity//molecular_function//transferase activity, transferring one-carbon groups//catalytic activity//transferase activity	no KO assigned | (RefSeq) purine permease 1-like	http://www.genome.jp/dbget-bin/www_bget?sot:102581812	--	PREDICTED: purine permease 1-like [Solanum tuberosum]
97	Novel01288	18.4578	0	Inf	0.00038871	0.0018077	UP	--	--	GO:0043226//GO:0043227//GO:0043231//GO:0005575//GO:0044464//GO:0005634//GO:0005622//GO:0005623//GO:0043229//GO:0044424	organelle//membrane-bounded organelle//intracellular membrane-bounded organelle//cellular_component//cell part//nucleus//intracellular//cell//intracellular organelle//intracellular part	--	--	K06627 cyclin A | (RefSeq) G2/mitotic-specific cyclin C13-1-like	http://www.genome.jp/dbget-bin/www_bget?sot:102586014	--	PREDICTED: putative cyclin-A3-1-like [Solanum tuberosum]
98	Novel01289	465.525	229.894	1.0179	0.00044145	0.0020194	UP	--	--	GO:0043229//GO:0044424//GO:0005634//GO:0005622//GO:0044464//GO:0005623//GO:0043231//GO:0005575//GO:0043227//GO:0043226	intracellular organelle//intracellular part//nucleus//intracellular//cell part//cell//intracellular membrane-bounded organelle//cellular_component//membrane-bounded organelle//organelle	--	--	K06627 cyclin A | (RefSeq) putative cyclin-A3-1	http://www.genome.jp/dbget-bin/www_bget?sot:102585677	--	PREDICTED: putative cyclin-A3-1-like [Solanum tuberosum]
99	Novel01290	596.431	278.141	1.1005	0.0035101	0.012089	UP	--	--	--	--	--	--	no KO assigned | (RefSeq) random slug protein 5-like	http://www.genome.jp/dbget-bin/www_bget?sot:102594629	--	PREDICTED: random slug protein 5-like isoform X1 [Solanum tuberosum]>gi|565351286|ref|XP_006342589.1| PREDICTED: random slug protein 5-like isoform X2 [Solanum tuberosum]>gi|565351288|ref|XP_006342590.1| PREDICTED: random slug protein 5-like isoform X3 [Solanum tuberosum]
100	Novel01352	1491.3	564.839	1.4007	1.8877e-08	2.4558e-07	UP	GO:0042221//GO:0008150//GO:0046677//GO:0009636//GO:0050896	response to chemical//biological_process//response to antibiotic//response to toxic substance//response to stimulus	--	--	--	--	K01653 acetolactate synthase I/III small subunit [EC:2.2.1.6] | (RefSeq) acetolactate synthase small subunit 1, chloroplastic-like	http://www.genome.jp/dbget-bin/www_bget?sot:102581549	--	PREDICTED: acetolactate synthase small subunit 1, chloroplastic [Solanum lycopersicum]
101	Novel01377	88.9403	33.8725	1.3927	0.0039803	0.01346	UP	--	--	--	--	--	--	--	--	--	--
102	Novel01378	125.918	57.4703	1.1316	0.0091829	0.027504	UP	--	--	--	--	--	--	no KO assigned | (RefSeq) uncharacterized protein PFB0765w-like	http://www.genome.jp/dbget-bin/www_bget?sot:102604602	--	PREDICTED: myosin-11-like [Solanum tuberosum]
103	Novel01389	343.542	156.266	1.1365	0.00017276	0.00088445	UP	GO:0043170//GO:0009059//GO:0044237//GO:0006139//GO:1901360//GO:0090304//GO:0044238//GO:0046483//GO:0009058//GO:0006807//GO:0006259//GO:0034641//GO:0006725//GO:0034645//GO:0071704//GO:1901576//GO:0044260//GO:0008152//GO:0009987//GO:0006260//GO:0008150//GO:0044249	macromolecule metabolic process//macromolecule biosynthetic process//cellular metabolic process//nucleobase-containing compound metabolic process//organic cyclic compound metabolic process//nucleic acid metabolic process//primary metabolic process//heterocycle metabolic process//biosynthetic process//nitrogen compound metabolic process//DNA metabolic process//cellular nitrogen compound metabolic …	--	--	GO:0003899//GO:0016772//GO:0034062//GO:0016779//GO:0003674//GO:0003896//GO:0003824//GO:0016740	DNA-directed 5'-3' RNA polymerase activity//transferase activity, transferring phosphorus-containing groups//5'-3' RNA polymerase activity//nucleotidyltransferase activity//molecular_function//DNA primase activity//catalytic activity//transferase activity	no KO assigned | (RefSeq) DNA-directed primase/polymerase protein	http://www.genome.jp/dbget-bin/www_bget?sot:102593845	--	PREDICTED: coiled-coil domain-containing protein 111 homolog isoform X1 [Solanum tuberosum]
104	Novel01390	82.9458	25.9861	1.6744	0.0014069	0.0055096	UP	GO:0043603//GO:0010467//GO:0019538//GO:0009058//GO:0006807//GO:0034470//GO:0006418//GO:0046483//GO:0044238//GO:0043436//GO:0090304//GO:0006412//GO:0034641//GO:0016070//GO:0019752//GO:0044267//GO:0009059//GO:0043170//GO:0006399//GO:0044271//GO:1901360//GO:0006139//GO:0043043//GO:0044237//GO:0043039//GO:0006082//GO:0006396//GO:0009987//GO:0044281//GO:0044249//GO:1901566//GO:0008033//GO:0043038//GO:…	cellular amide metabolic process//gene expression//protein metabolic process//biosynthetic process//nitrogen compound metabolic process//ncRNA processing//tRNA aminoacylation for protein translation//heterocycle metabolic process//primary metabolic process//oxoacid metabolic process//nucleic acid metabolic process//translation//cellular nitrogen compound metabolic process//RNA metabolic process//…	--	--	GO:0003723//GO:0043169//GO:0001882//GO:0000166//GO:0001883//GO:0017076//GO:0016874//GO:0097367//GO:0046872//GO:0016875//GO:1901265//GO:0005488//GO:0032549//GO:0032559//GO:0043168//GO:0097159//GO:0004812//GO:1901363//GO:0004826//GO:0003676//GO:0003824//GO:0030554//GO:0000049//GO:0036094//GO:0003674//GO:0043167//GO:0032555//GO:0035639//GO:0032550//GO:0005524//GO:0032553//GO:0000287	RNA binding//cation binding//nucleoside binding//nucleotide binding//purine nucleoside binding//purine nucleotide binding//ligase activity//carbohydrate derivative binding//metal ion binding//ligase activity, forming carbon-oxygen bonds//nucleoside phosphate binding//binding//ribonucleoside binding//adenyl ribonucleotide binding//anion binding//organic cyclic compound binding//aminoacyl-tRNA liga…	K01889 phenylalanyl-tRNA synthetase alpha chain [EC:6.1.1.20] | (RefSeq) phenylalanine--tRNA ligase, chloroplastic/mitochondrial	http://www.genome.jp/dbget-bin/www_bget?sot:102580607	--	PREDICTED: phenylalanine--tRNA ligase, chloroplastic/mitochondrial-like [Solanum tuberosum]
105	Novel01411	80.3444	12.2572	2.7126	0.0027871	0.0099163	UP	--	--	--	--	--	--	no KO assigned | (RefSeq) TMV resistance protein N-like	http://www.genome.jp/dbget-bin/www_bget?sot:102593347	--	PREDICTED: TMV resistance protein N-like [Solanum tuberosum]
106	Novel01422	40.3036	0.985675	5.3537	2.4588e-07	2.512e-06	UP	--	--	--	--	--	--	--	--	--	--
107	Novel01435	2191.53	877.216	1.3209	4.9564e-08	5.8744e-07	UP	GO:0046146//GO:0009987//GO:1901362//GO:1901566//GO:0044249//GO:0008150//GO:1901564//GO:0051188//GO:0006729//GO:0019438//GO:1901576//GO:0071704//GO:0006725//GO:0008152//GO:0042559//GO:0009058//GO:0006807//GO:0046483//GO:0009108//GO:0051186//GO:0034641//GO:0018130//GO:0006732//GO:0044271//GO:1901360//GO:0042558//GO:0044237	tetrahydrobiopterin metabolic process//cellular process//organic cyclic compound biosynthetic process//organonitrogen compound biosynthetic process//cellular biosynthetic process//biological_process//organonitrogen compound metabolic process//cofactor biosynthetic process//tetrahydrobiopterin biosynthetic process//aromatic compound biosynthetic process//organic substance biosynthetic process//org…	--	--	GO:0016836//GO:0003824//GO:0003674//GO:0016829//GO:0008124//GO:0016835	hydro-lyase activity//catalytic activity//molecular_function//lyase activity//4-alpha-hydroxytetrahydrobiopterin dehydratase activity//carbon-oxygen lyase activity	K01724 4a-hydroxytetrahydrobiopterin dehydratase [EC:4.2.1.96] | (RefSeq) putative pterin-4-alpha-carbinolamine dehydratase	http://www.genome.jp/dbget-bin/www_bget?sot:102602253	--	PREDICTED: uncharacterized protein LOC102602253 [Solanum tuberosum]
108	Novel01446	44.2895	9.21504	2.2649	0.0019138	0.0071903	UP	--	--	--	--	--	--	--	--	--	--
109	Novel01453	501.431	231.785	1.1133	0.012144	0.034862	UP	GO:0019752//GO:0006629//GO:0043436//GO:0044238//GO:0044237//GO:0044255//GO:0008150//GO:0044281//GO:0009987//GO:0055114//GO:0006082//GO:0008152//GO:0032787//GO:0071704//GO:0006631	carboxylic acid metabolic process//lipid metabolic process//oxoacid metabolic process//primary metabolic process//cellular metabolic process//cellular lipid metabolic process//biological_process//small molecule metabolic process//cellular process//oxidation-reduction process//organic acid metabolic process//metabolic process//monocarboxylic acid metabolic process//organic substance metabolic proc…	--	--	GO:0000166//GO:0005515//GO:0051287//GO:0005488//GO:1901265//GO:0016614//GO:0048037//GO:0016616//GO:0003824//GO:1901363//GO:0016491//GO:0003857//GO:0097159//GO:0050662//GO:0004616//GO:0003674//GO:0036094	nucleotide binding//protein binding//NAD binding//binding//nucleoside phosphate binding//oxidoreductase activity, acting on CH-OH group of donors//cofactor binding//oxidoreductase activity, acting on the CH-OH group of donors, NAD or NADP as acceptor//catalytic activity//heterocyclic compound binding//oxidoreductase activity//3-hydroxyacyl-CoA dehydrogenase activity//organic cyclic compound bindi…	K00020 3-hydroxyisobutyrate dehydrogenase [EC:1.1.1.31] | (RefSeq) probable 3-hydroxyisobutyrate dehydrogenase, mitochondrial	http://www.genome.jp/dbget-bin/www_bget?sot:102599107	--	PREDICTED: probable 3-hydroxyisobutyrate dehydrogenase, mitochondrial-like [Solanum tuberosum]
110	Novel01460	41.5951	0	Inf	4.2919e-06	3.2873e-05	UP	--	--	--	--	--	--	--	--	--	PREDICTED: uncharacterized protein LOC103423104 [Malus domestica]
111	Novel01461	31.6583	0	Inf	1.648e-07	1.7402e-06	UP	--	--	--	--	--	--	--	--	--	PREDICTED: uncharacterized protein LOC104649178 [Solanum lycopersicum]
112	Novel01464	808.698	383.422	1.0767	3.8091e-05	0.00023145	UP	GO:0044085//GO:0043933//GO:0065003//GO:0016043//GO:0071840//GO:0022607//GO:0008150//GO:0009987//GO:0070271	cellular component biogenesis//protein-containing complex subunit organization//protein-containing complex assembly//cellular component organization//cellular component organization or biogenesis//cellular component assembly//biological_process//cellular process//obsolete protein complex biogenesis	GO:0044444//GO:0005623//GO:0044464//GO:0005622//GO:0044424//GO:0043229//GO:0043226//GO:0005737//GO:0043227//GO:0005739//GO:0005575//GO:0043231	cytoplasmic part//cell//cell part//intracellular//intracellular part//intracellular organelle//organelle//cytoplasm//membrane-bounded organelle//mitochondrion//cellular_component//intracellular membrane-bounded organelle	--	--	K07555 ATP synthase mitochondrial F1 complex assembly factor 1 | (RefSeq) ATP synthase mitochondrial F1 complex assembly factor 1	http://www.genome.jp/dbget-bin/www_bget?sot:102606126	--	PREDICTED: ATP synthase mitochondrial F1 complex assembly factor 1-like isoform X1 [Solanum tuberosum]>gi|565381041|ref|XP_006356891.1| PREDICTED: ATP synthase mitochondrial F1 complex assembly factor 1-like isoform X2 [Solanum tuberosum]>gi|565381043|ref|XP_006356892.1| PREDICTED: ATP synthase mitochondrial F1 complex assembly factor 1-like isoform X3 [Solanum tuberosum]
113	Novel01500	221.638	51.6725	2.1007	0.00016776	0.00086139	UP	--	--	--	--	--	--	K19788 obg-like ATPase 1 | (RefSeq) obg-like ATPase 1	http://www.genome.jp/dbget-bin/www_bget?sot:102599980	--	--
114	Novel01521	89.2576	30.9325	1.5289	0.002037	0.0075773	UP	--	--	--	--	--	--	K15601 lysine-specific demethylase 3 [EC:1.14.11.-] | (RefSeq) lysine-specific demethylase JMJ25	http://www.genome.jp/dbget-bin/www_bget?sot:102600140	--	PREDICTED: uncharacterized protein LOC102600140 isoform X3 [Solanum tuberosum]
115	Novel01526	476.405	99.8294	2.2547	0.013235	0.037561	UP	GO:0005975//GO:0071704//GO:0008152//GO:0008150//GO:0044238	carbohydrate metabolic process//organic substance metabolic process//metabolic process//biological_process//primary metabolic process	--	--	GO:0003674//GO:0016787//GO:0004553//GO:0003824//GO:0016798	molecular_function//hydrolase activity//hydrolase activity, hydrolyzing O-glycosyl compounds//catalytic activity//hydrolase activity, acting on glycosyl bonds	K05350 beta-glucosidase [EC:3.2.1.21] | (RefSeq) beta-glucosidase 18-like	http://www.genome.jp/dbget-bin/www_bget?sot:102588686	--	PREDICTED: beta-glucosidase 47-like [Solanum tuberosum]
116	Novel01539	60.2703	21.3074	1.5001	0.010609	0.031084	UP	--	--	--	--	--	--	K08739 DNA mismatch repair protein MLH3 | (RefSeq) DNA mismatch repair protein MLH3	http://www.genome.jp/dbget-bin/www_bget?sot:102597269	--	PREDICTED: DNA mismatch repair protein MLH3 isoform X4 [Solanum lycopersicum]>gi|723673086|ref|XP_010316476.1| PREDICTED: DNA mismatch repair protein MLH3 isoform X4 [Solanum lycopersicum]>gi|723673089|ref|XP_010316477.1| PREDICTED: DNA mismatch repair protein MLH3 isoform X4 [Solanum lycopersicum]>gi|723673092|ref|XP_010316478.1| PREDICTED: DNA mismatch repair protein MLH3 isoform X4 [Solanum ly…
117	Novel01585	399.146	193.617	1.0437	0.00030831	0.0014782	UP	--	--	--	--	--	--	--	--	--	--
118	Novel01627	277.573	127.019	1.1278	0.00040096	0.0018579	UP	GO:0044238//GO:0071704//GO:0005975//GO:0008152//GO:0008150	primary metabolic process//organic substance metabolic process//carbohydrate metabolic process//metabolic process//biological_process	--	--	GO:0016798//GO:0003674//GO:0004553//GO:0016787//GO:0003824	hydrolase activity, acting on glycosyl bonds//molecular_function//hydrolase activity, hydrolyzing O-glycosyl compounds//hydrolase activity//catalytic activity	K01187 alpha-glucosidase [EC:3.2.1.20] | (RefSeq) alpha-glucosidase-like	http://www.genome.jp/dbget-bin/www_bget?sot:102597879	--	PREDICTED: alpha-glucosidase-like [Solanum tuberosum]
119	Novel01634	183.534	68.0314	1.4318	0.00013879	0.00072877	UP	GO:0008152//GO:0055114//GO:0008150	metabolic process//oxidation-reduction process//biological_process	--	--	GO:0003674//GO:0003824//GO:0016491	molecular_function//catalytic activity//oxidoreductase activity	no KO assigned | (RefSeq) protein SRG1-like	http://www.genome.jp/dbget-bin/www_bget?sot:102581116	--	PREDICTED: protein SRG1-like [Solanum tuberosum]
120	Novel01639	62.3967	11.7804	2.4051	0.00013589	0.00071478	UP	GO:0008150//GO:0043412//GO:0006796//GO:0009987//GO:0006793//GO:0008152//GO:0044260//GO:0071704//GO:0044267//GO:0019538//GO:0006468//GO:0044238//GO:0036211//GO:0044237//GO:0006464//GO:0016310//GO:0043170	biological_process//macromolecule modification//phosphate-containing compound metabolic process//cellular process//phosphorus metabolic process//metabolic process//cellular macromolecule metabolic process//organic substance metabolic process//cellular protein metabolic process//protein metabolic process//protein phosphorylation//primary metabolic process//protein modification process//cellular me…	--	--	GO:0016740//GO:0003824//GO:0030554//GO:1901363//GO:0097159//GO:0032550//GO:0035639//GO:0032555//GO:0032553//GO:0005524//GO:0016301//GO:0003674//GO:0036094//GO:0043167//GO:0001882//GO:0016772//GO:0004672//GO:0001883//GO:0000166//GO:0016773//GO:0032549//GO:0032559//GO:0005488//GO:0043168//GO:0017076//GO:1901265//GO:0097367	transferase activity//catalytic activity//adenyl nucleotide binding//heterocyclic compound binding//organic cyclic compound binding//purine ribonucleoside binding//purine ribonucleoside triphosphate binding//purine ribonucleotide binding//ribonucleotide binding//ATP binding//kinase activity//molecular_function//small molecule binding//ion binding//nucleoside binding//transferase activity, transfe…	--	--	--	PREDICTED: probable LRR receptor-like serine/threonine-protein kinase At1g07650-like [Solanum tuberosum]
121	Novel01642	56.6595	14.9809	1.9192	0.0021388	0.0078987	UP	GO:0006796//GO:0009987//GO:0008150//GO:0043412//GO:0044260//GO:0071704//GO:0006793//GO:0008152//GO:0019538//GO:0006468//GO:0044238//GO:0036211//GO:0044267//GO:0006464//GO:0043170//GO:0016310//GO:0044237	phosphate-containing compound metabolic process//cellular process//biological_process//macromolecule modification//cellular macromolecule metabolic process//organic substance metabolic process//phosphorus metabolic process//metabolic process//protein metabolic process//protein phosphorylation//primary metabolic process//protein modification process//cellular protein metabolic process//cellular pr…	--	--	GO:0097159//GO:0016740//GO:1901363//GO:0030554//GO:0003824//GO:0003674//GO:0036094//GO:0043167//GO:0035639//GO:0032555//GO:0032550//GO:0016301//GO:0032553//GO:0005524//GO:0016773//GO:0004672//GO:0001882//GO:0016772//GO:0000166//GO:0001883//GO:0017076//GO:0097367//GO:1901265//GO:0005488//GO:0032559//GO:0032549//GO:0043168	organic cyclic compound binding//transferase activity//heterocyclic compound binding//adenyl nucleotide binding//catalytic activity//molecular_function//small molecule binding//ion binding//purine ribonucleoside triphosphate binding//purine ribonucleotide binding//purine ribonucleoside binding//kinase activity//ribonucleotide binding//ATP binding//phosphotransferase activity, alcohol group as acc…	--	--	--	PREDICTED: probable LRR receptor-like serine/threonine-protein kinase At1g07650-like [Solanum tuberosum]
122	Novel01656	20.9061	3.70324	2.4971	0.018108	0.049015	UP	--	--	--	--	--	--	no KO assigned | (RefSeq) uncharacterized LOC102601028	http://www.genome.jp/dbget-bin/www_bget?sot:102601028	--	PREDICTED: uncharacterized protein LOC102601028 [Solanum tuberosum]
123	Novel01666	6318.68	1293.64	2.2882	1.1032e-21	1.1028e-19	UP	GO:0043170//GO:0016310//GO:0006464//GO:0044237//GO:0036211//GO:0044238//GO:0006468//GO:0019538//GO:0044267//GO:0071704//GO:0044260//GO:0008152//GO:0006793//GO:0009987//GO:0006796//GO:0043412//GO:0008150	macromolecule metabolic process//phosphorylation//cellular protein modification process//cellular metabolic process//protein modification process//primary metabolic process//protein phosphorylation//protein metabolic process//cellular protein metabolic process//organic substance metabolic process//cellular macromolecule metabolic process//metabolic process//phosphorus metabolic process//cellular …	--	--	GO:0097367//GO:1901265//GO:0017076//GO:0043168//GO:0005488//GO:0032549//GO:0032559//GO:0016773//GO:0000166//GO:0001883//GO:0004672//GO:0016772//GO:0001882//GO:0043167//GO:0036094//GO:0003674//GO:0016301//GO:0005524//GO:0032553//GO:0032555//GO:0035639//GO:0032550//GO:0097159//GO:1901363//GO:0003824//GO:0030554//GO:0016740	carbohydrate derivative binding//nucleoside phosphate binding//purine nucleotide binding//anion binding//binding//ribonucleoside binding//adenyl ribonucleotide binding//phosphotransferase activity, alcohol group as acceptor//nucleotide binding//purine nucleoside binding//protein kinase activity//transferase activity, transferring phosphorus-containing groups//nucleoside binding//ion binding//smal…	--	--	--	PREDICTED: putative receptor-like protein kinase At4g00960 [Solanum lycopersicum]
124	Novel01668	916.169	313.55	1.5469	1.1244e-06	9.9735e-06	UP	--	--	--	--	--	--	--	--	--	PREDICTED: putative receptor-like protein kinase At4g00960 [Solanum lycopersicum]
125	Novel01671	1277.72	315.924	2.0159	2.8018e-09	4.3144e-08	UP	--	--	--	--	--	--	no KO assigned | (RefSeq) uncharacterized LOC102605469	http://www.genome.jp/dbget-bin/www_bget?sot:102605469	--	PREDICTED: uncharacterized protein LOC102605469 [Solanum tuberosum]
126	Novel01675	90.3386	26.6111	1.7633	0.00032964	0.0015678	UP	GO:0008152//GO:0006793//GO:0071704//GO:0044260//GO:0043412//GO:0008150//GO:0009987//GO:0006796//GO:0044237//GO:0043170//GO:0016310//GO:0006464//GO:0044267//GO:0006468//GO:0044238//GO:0036211//GO:0019538	metabolic process//phosphorus metabolic process//organic substance metabolic process//cellular macromolecule metabolic process//macromolecule modification//biological_process//cellular process//phosphate-containing compound metabolic process//cellular metabolic process//macromolecule metabolic process//phosphorylation//cellular protein modification process//cellular protein metabolic process//pro…	--	--	GO:0016301//GO:0032553//GO:0005524//GO:0035639//GO:0032555//GO:0032550//GO:0043167//GO:0003674//GO:0036094//GO:1901363//GO:0003824//GO:0030554//GO:0016740//GO:0097159//GO:0043168//GO:0005488//GO:0032549//GO:0032559//GO:0097367//GO:1901265//GO:0017076//GO:0000166//GO:0001883//GO:0004672//GO:0001882//GO:0016772//GO:0016773	kinase activity//ribonucleotide binding//ATP binding//purine ribonucleoside triphosphate binding//purine ribonucleotide binding//purine ribonucleoside binding//ion binding//molecular_function//small molecule binding//heterocyclic compound binding//catalytic activity//adenyl nucleotide binding//transferase activity//organic cyclic compound binding//anion binding//binding//ribonucleoside binding//a…	K13429 chitin elicitor receptor kinase 1 | (RefSeq) chitin elicitor receptor kinase 1-like	http://www.genome.jp/dbget-bin/www_bget?sot:102580507	--	PREDICTED: chitin elicitor receptor kinase 1-like [Solanum tuberosum]
127	Novel01676	96.2351	18.5783	2.3729	6.2104e-06	4.5525e-05	UP	GO:0050896//GO:0034641//GO:0006259//GO:0044238//GO:0046483//GO:0090304//GO:0006807//GO:0044237//GO:0051716//GO:0006974//GO:0006950//GO:0006139//GO:1901360//GO:0043170//GO:0008150//GO:0006281//GO:0009987//GO:0033554//GO:0006298//GO:0008152//GO:0071704//GO:0006725//GO:0044260	response to stimulus//cellular nitrogen compound metabolic process//DNA metabolic process//primary metabolic process//heterocycle metabolic process//nucleic acid metabolic process//nitrogen compound metabolic process//cellular metabolic process//cellular response to stimulus//cellular response to DNA damage stimulus//response to stress//nucleobase-containing compound metabolic process//organic cy…	--	--	GO:0000166//GO:0001883//GO:0001882//GO:0043168//GO:0005488//GO:0032559//GO:0032549//GO:0097367//GO:1901265//GO:0017076//GO:1901363//GO:0030554//GO:0097159//GO:0005524//GO:0032553//GO:0032555//GO:0035639//GO:0032550//GO:0043167//GO:0036094//GO:0003674	nucleotide binding//purine nucleoside binding//nucleoside binding//anion binding//binding//adenyl ribonucleotide binding//ribonucleoside binding//carbohydrate derivative binding//nucleoside phosphate binding//purine nucleotide binding//heterocyclic compound binding//adenyl nucleotide binding//organic cyclic compound binding//ATP binding//ribonucleotide binding//purine ribonucleotide binding//puri…	K10592 E3 ubiquitin-protein ligase HUWE1 [EC:2.3.2.26] | (RefSeq) E3 ubiquitin-protein ligase UPL1-like	http://www.genome.jp/dbget-bin/www_bget?sot:102596804	--	BnaAnng25310D, partial [Brassica napus]
128	Novel01686	55.7777	11.4377	2.2859	0.00044624	0.0020368	UP	--	--	--	--	--	--	no KO assigned | (RefSeq) zinc finger CCCH domain-containing protein 68	http://www.genome.jp/dbget-bin/www_bget?sot:102585203	--	PREDICTED: zinc finger CCCH domain-containing protein 68 [Nicotiana tomentosiformis]
129	Novel01700	1134.5	477.982	1.247	9.0757e-07	8.2347e-06	UP	GO:0044238//GO:0036211//GO:0042158//GO:1903509//GO:0019538//GO:0009058//GO:0046467//GO:0046488//GO:0046486//GO:0044267//GO:1901135//GO:0006629//GO:0042157//GO:0090407//GO:0044255//GO:0043170//GO:0009059//GO:0006464//GO:0045017//GO:0006644//GO:0008654//GO:0044237//GO:0006497//GO:0009987//GO:0008610//GO:0019637//GO:0006796//GO:0043412//GO:0006643//GO:0008150//GO:0046474//GO:0044249//GO:0006664//GO:…	primary metabolic process//protein modification process//lipoprotein biosynthetic process//liposaccharide metabolic process//protein metabolic process//biosynthetic process//membrane lipid biosynthetic process//phosphatidylinositol metabolic process//glycerolipid metabolic process//cellular protein metabolic process//carbohydrate derivative metabolic process//lipid metabolic process//lipoprotein …	--	--	GO:0004584//GO:0000030//GO:0016758//GO:0003824//GO:0016740//GO:0016491//GO:0003674//GO:0016757	dolichyl-phosphate-mannose-glycolipid alpha-mannosyltransferase activity//mannosyltransferase activity//transferase activity, transferring hexosyl groups//catalytic activity//transferase activity//oxidoreductase activity//molecular_function//transferase activity, transferring glycosyl groups	no KO assigned | (RefSeq) double-stranded RNA-binding protein 4-like	http://www.genome.jp/dbget-bin/www_bget?sot:102594805	--	PREDICTED: double-stranded RNA-binding protein 4-like [Solanum tuberosum]
130	Novel01701	61.7127	11.3369	2.4445	7.964e-05	0.0004461	UP	--	--	--	--	--	--	--	--	--	--
131	Novel01722	306.44	130.575	1.2307	7.9369e-05	0.00044475	UP	GO:0006812//GO:0006811//GO:0051179//GO:0051641//GO:0051649//GO:0008150//GO:0051234//GO:0006810//GO:0030001//GO:0007034//GO:0046907	cation transport//ion transport//localization//cellular localization//establishment of localization in cell//biological_process//establishment of localization//transport//metal ion transport//vacuolar transport//intracellular transport	--	--	GO:0005488//GO:0042393//GO:0005515//GO:0003674	binding//histone binding//protein binding//molecular_function	K11420 euchromatic histone-lysine N-methyltransferase [EC:2.1.1.43] | (RefSeq) histone-lysine N-methyltransferase, H3 lysine-9 specific SUVH4	http://www.genome.jp/dbget-bin/www_bget?sot:102587095	--	PREDICTED: histone-lysine N-methyltransferase, H3 lysine-9 specific SUVH4-like [Solanum tuberosum]
132	Novel01747	192.222	42.7882	2.1675	3.7431e-07	3.6882e-06	UP	--	--	GO:0019867//GO:0005575//GO:0016020	outer membrane//cellular_component//membrane	GO:0005515//GO:0005488//GO:0003674	protein binding//binding//molecular_function	no KO assigned | (RefSeq) uncharacterized LOC102590186	http://www.genome.jp/dbget-bin/www_bget?sot:102590186	--	PREDICTED: topless-related protein 1-like isoform X1 [Solanum tuberosum]
133	Novel01750	277.862	75.3636	1.8824	0.0014102	0.0055216	UP	GO:0009987//GO:0008150//GO:1901564//GO:1901566//GO:0044249//GO:0043604//GO:1901576//GO:0044260//GO:0006518//GO:0071704//GO:0034645//GO:0008152//GO:0009058//GO:0019538//GO:0006807//GO:0043603//GO:0010467//GO:0006412//GO:0044238//GO:0034641//GO:0044267//GO:0009059//GO:0043170//GO:0043043//GO:0044271//GO:0044237	cellular process//biological_process//organonitrogen compound metabolic process//organonitrogen compound biosynthetic process//cellular biosynthetic process//amide biosynthetic process//organic substance biosynthetic process//cellular macromolecule metabolic process//peptide metabolic process//organic substance metabolic process//cellular macromolecule biosynthetic process//metabolic process//bio…	GO:0043226//GO:0005575//GO:0032991//GO:0005840//GO:0005737//GO:0005622//GO:0044464//GO:0043228//GO:0005623//GO:0044444//GO:0043229//GO:0043232//GO:0044424	organelle//cellular_component//protein-containing complex//ribosome//cytoplasm//intracellular//cell part//non-membrane-bounded organelle//cell//cytoplasmic part//intracellular organelle//intracellular non-membrane-bounded organelle//intracellular part	GO:0003735//GO:0005198//GO:0003674	structural constituent of ribosome//structural molecule activity//molecular_function	--	--	--	Putative gag-pol polyprotein, identical [Solanum demissum]
134	Novel01776	576.963	184.701	1.6433	7.9886e-09	1.1278e-07	UP	--	--	--	--	--	--	--	--	--	PREDICTED: putative ribonuclease H protein At1g65750-like [Solanum tuberosum]
135	Novel01800	899.455	366.798	1.2941	9.4973e-07	8.5805e-06	UP	GO:0007154//GO:0051716//GO:0007165//GO:0065007//GO:0050896//GO:0050794//GO:0009987//GO:0050789//GO:0008150//GO:0023052	cell communication//cellular response to stimulus//signal transduction//biological regulation//response to stimulus//regulation of cellular process//cellular process//regulation of biological process//biological_process//signaling	GO:0044421//GO:0005576//GO:0031012//GO:0005575	extracellular region part//extracellular region//extracellular matrix//cellular_component	GO:0046872//GO:0005488//GO:0005515//GO:0043169//GO:0003677//GO:0003674//GO:0043167//GO:0005509//GO:0097159//GO:0003676//GO:1901363//GO:0003824	metal ion binding//binding//protein binding//cation binding//DNA binding//molecular_function//ion binding//calcium ion binding//organic cyclic compound binding//nucleic acid binding//heterocyclic compound binding//catalytic activity	K13448 calcium-binding protein CML | (RefSeq) probable calcium-binding protein CML13	http://www.genome.jp/dbget-bin/www_bget?sot:102581843	--	PREDICTED: probable calcium-binding protein CML13 [Solanum lycopersicum]>gi|565399411|ref|XP_006365245.1| PREDICTED: probable calcium-binding protein CML13-like [Solanum tuberosum]
136	Novel01826	229.474	53.4681	2.1016	1.3778e-08	1.8517e-07	UP	--	--	--	--	--	--	--	--	--	--
137	Novel01833	1490.63	615.646	1.2757	1.9683e-06	1.6327e-05	UP	--	--	--	--	--	--	no KO assigned | (RefSeq) uncharacterized protein At3g49140-like	http://www.genome.jp/dbget-bin/www_bget?sot:102601899	--	PREDICTED: uncharacterized protein At3g49140-like [Solanum lycopersicum]
138	Novel01839	782.348	297.404	1.3954	1.558e-07	1.6531e-06	UP	--	--	--	--	--	--	no KO assigned | (RefSeq) uncharacterized LOC102597226	http://www.genome.jp/dbget-bin/www_bget?sot:102597226	--	PREDICTED: uncharacterized protein LOC102597226 isoform X2 [Solanum tuberosum]
139	Novel01840	896.026	266.754	1.748	7.5653e-11	1.5739e-09	UP	--	--	--	--	--	--	no KO assigned | (RefSeq) uncharacterized LOC102597967	http://www.genome.jp/dbget-bin/www_bget?sot:102597967	--	PREDICTED: uncharacterized protein LOC102597967 [Solanum tuberosum]
140	Novel01867	1245.07	611.049	1.0269	4.2011e-05	0.00025222	UP	GO:0044419//GO:0044764//GO:0044403//GO:0016032//GO:0051704//GO:0008150//GO:0009987	interspecies interaction between organisms//multi-organism cellular process//symbiont process//viral process//multi-organism process//biological_process//cellular process	GO:0005575//GO:0019012	cellular_component//virion	--	--	K11407 histone deacetylase 6 [EC:3.5.1.98] | (RefSeq) histone deacetylase 15	http://www.genome.jp/dbget-bin/www_bget?sot:102603454	--	PREDICTED: histone deacetylase 15-like isoform X1 [Solanum tuberosum]
141	Novel01868	29.9111	2.22884	3.7463	0.00025978	0.0012722	UP	--	--	--	--	--	--	no KO assigned | (RefSeq) uncharacterized LOC102594947	http://www.genome.jp/dbget-bin/www_bget?sot:102594947	--	PREDICTED: uncharacterized protein LOC102594947 [Solanum tuberosum]
142	Novel01879	34.0466	2.55919	3.7338	8.9004e-05	0.00049099	UP	GO:0008150//GO:0008152	biological_process//metabolic process	--	--	GO:0042578//GO:0003677//GO:0005488//GO:0097159//GO:0016788//GO:0003824//GO:0003676//GO:1901363//GO:0003674//GO:0016791//GO:0016787	phosphoric ester hydrolase activity//DNA binding//binding//organic cyclic compound binding//hydrolase activity, acting on ester bonds//catalytic activity//nucleic acid binding//heterocyclic compound binding//molecular_function//phosphatase activity//hydrolase activity	K13248 pyridoxal phosphate phosphatase PHOSPHO2 [EC:3.1.3.74] | (RefSeq) inorganic pyrophosphatase 1-like	http://www.genome.jp/dbget-bin/www_bget?sot:102594183	--	PREDICTED: inorganic pyrophosphatase 1-like [Solanum tuberosum]
143	Novel01892	3325.95	1357.57	1.2927	4.7968e-08	5.7192e-07	UP	GO:0051234//GO:0006810//GO:0008150//GO:1901564//GO:0006465//GO:0009987//GO:0006508//GO:0016485//GO:0008152//GO:0044260//GO:0051604//GO:0071704//GO:0006518//GO:0034641//GO:0044267//GO:0010467//GO:0051179//GO:0043603//GO:0006807//GO:0019538//GO:0044238//GO:0044237//GO:0043170	establishment of localization//transport//biological_process//organonitrogen compound metabolic process//signal peptide processing//cellular process//proteolysis//protein processing//metabolic process//cellular macromolecule metabolic process//protein maturation//organic substance metabolic process//peptide metabolic process//cellular nitrogen compound metabolic process//cellular protein metaboli…	GO:0098796//GO:0005783//GO:0043226//GO:0042175//GO:1990234//GO:0005737//GO:0071944//GO:0005789//GO:1902494//GO:0005575//GO:0043231//GO:0098588//GO:0032991//GO:0005886//GO:0016020//GO:0043227//GO:0044432//GO:0044444//GO:0005623//GO:0005622//GO:0044464//GO:0031224//GO:0012505//GO:0005787//GO:0044424//GO:0044425//GO:0044422//GO:0016021//GO:0043229//GO:0044446//GO:0031090	membrane protein complex//endoplasmic reticulum//organelle//nuclear outer membrane-endoplasmic reticulum membrane network//transferase complex//cytoplasm//cell periphery//endoplasmic reticulum membrane//catalytic complex//cellular_component//intracellular membrane-bounded organelle//bounding membrane of organelle//protein-containing complex//plasma membrane//membrane//membrane-bounded organelle//…	GO:0003824//GO:0016787//GO:0003674//GO:0008233	catalytic activity//hydrolase activity//molecular_function//peptidase activity	K12946 signal peptidase complex subunit 1 [EC:3.4.-.-] | (RefSeq) probable signal peptidase complex subunit 1	http://www.genome.jp/dbget-bin/www_bget?sot:102603310	--	PREDICTED: probable signal peptidase complex subunit 1-like [Solanum tuberosum]
144	Novel01900	31.5281	0.312324	6.6574	1.0168e-06	9.1227e-06	UP	GO:1901362//GO:0009987//GO:0046148//GO:0070085//GO:0055114//GO:0015980//GO:0009100//GO:0006784//GO:0019438//GO:0043412//GO:0051188//GO:0008150//GO:1901564//GO:1901566//GO:0019645//GO:0044249//GO:0042168//GO:0006486//GO:0006725//GO:0033013//GO:0071704//GO:0034645//GO:0022900//GO:0006783//GO:0005975//GO:0044260//GO:0006778//GO:1901576//GO:0008152//GO:0042440//GO:0022904//GO:0006493//GO:1901137//GO:…	organic cyclic compound biosynthetic process//cellular process//pigment biosynthetic process//glycosylation//oxidation-reduction process//energy derivation by oxidation of organic compounds//glycoprotein metabolic process//heme a biosynthetic process//aromatic compound biosynthetic process//macromolecule modification//cofactor biosynthetic process//biological_process//organonitrogen compound meta…	GO:0005886//GO:0016020//GO:0019012//GO:0005575//GO:0071944//GO:0044423//GO:0031224//GO:0044464//GO:0019031//GO:0005623//GO:0036338//GO:0016021//GO:0044425	plasma membrane//membrane//virion//cellular_component//cell periphery//virion part//intrinsic component of membrane//cell part//viral envelope//cell//viral membrane//integral component of membrane//membrane part	GO:0003824//GO:0016740//GO:0016491//GO:0003674//GO:0016757//GO:0009055//GO:0016627//GO:0000030//GO:0016758	catalytic activity//transferase activity//oxidoreductase activity//molecular_function//transferase activity, transferring glycosyl groups//electron transfer activity//oxidoreductase activity, acting on the CH-CH group of donors//mannosyltransferase activity//transferase activity, transferring hexosyl groups	no KO assigned | (RefSeq) cytochrome b561 and DOMON domain-containing protein At5g35735-like	http://www.genome.jp/dbget-bin/www_bget?sot:102602906	--	PREDICTED: ferric-chelate reductase 1-like [Solanum tuberosum]
145	Novel01902	622.518	272.633	1.1912	4.5472e-05	0.00027059	UP	GO:0019079//GO:0019438//GO:0043412//GO:2000112//GO:0031326//GO:0008150//GO:0006355//GO:0050789//GO:0044249//GO:0031323//GO:0009889//GO:1901362//GO:0080090//GO:0009987//GO:0051171//GO:0051606//GO:0008152//GO:0009584//GO:0009583//GO:0051252//GO:1903506//GO:0006725//GO:0071704//GO:0097659//GO:0034645//GO:0006351//GO:1901576//GO:0044260//GO:2001141//GO:0019058//GO:0010556//GO:0060255//GO:0034654//GO:…	viral genome replication//aromatic compound biosynthetic process//macromolecule modification//regulation of cellular macromolecule biosynthetic process//regulation of cellular biosynthetic process//biological_process//regulation of transcription, DNA-templated//regulation of biological process//cellular biosynthetic process//regulation of cellular metabolic process//regulation of biosynthetic pro…	--	--	GO:0030554//GO:0003824//GO:1901363//GO:0003676//GO:0097159//GO:0004386//GO:0016462//GO:0005524//GO:0032553//GO:0016787//GO:0032550//GO:0032555//GO:0035639//GO:0043167//GO:0016818//GO:0036094//GO:0003674//GO:0070035//GO:0001883//GO:0003677//GO:0000166//GO:0016887//GO:0001882//GO:0017111//GO:0043168//GO:0008026//GO:0032559//GO:0016817//GO:0032549//GO:0005488//GO:0042623//GO:1901265//GO:0097367//GO:…	adenyl nucleotide binding//catalytic activity//heterocyclic compound binding//nucleic acid binding//organic cyclic compound binding//helicase activity//pyrophosphatase activity//ATP binding//ribonucleotide binding//hydrolase activity//purine ribonucleoside binding//purine ribonucleotide binding//purine ribonucleoside triphosphate binding//ion binding//hydrolase activity, acting on acid anhydrides…	K10706 senataxin [EC:3.6.4.-] | (RefSeq) uncharacterized LOC102595832	http://www.genome.jp/dbget-bin/www_bget?sot:102595832	--	PREDICTED: uncharacterized protein LOC102595832 [Solanum tuberosum]
146	Novel01916	437.931	138.588	1.6599	4.0497e-08	4.9112e-07	UP	--	--	--	--	GO:0003674//GO:0016787//GO:0003824	molecular_function//hydrolase activity//catalytic activity	K07766 diphosphoinositol-polyphosphate diphosphatase [EC:3.6.1.52] | (RefSeq) nudix hydrolase 16, mitochondrial-like	http://www.genome.jp/dbget-bin/www_bget?sot:102578220	--	PREDICTED: nudix hydrolase 16, mitochondrial-like [Solanum tuberosum]
147	Novel01918	1328.43	226.801	2.5502	1.5855e-21	1.5586e-19	UP	--	--	--	--	--	--	no KO assigned | (RefSeq) probable plastid-lipid-associated protein 13, chloroplastic	http://www.genome.jp/dbget-bin/www_bget?sot:102601712	--	PREDICTED: probable plastid-lipid-associated protein 13, chloroplastic isoform X1 [Solanum lycopersicum]
148	Novel01922	63.134	15.312	2.0438	0.00064573	0.0028007	UP	--	--	--	--	--	--	K02925 large subunit ribosomal protein L3e | (RefSeq) 60S ribosomal protein L3-like	http://www.genome.jp/dbget-bin/www_bget?sot:102598069	--	TPA: hypothetical protein ZEAMMB73_880497 [Zea mays]
149	Novel01929	291.014	139.988	1.0558	0.00091638	0.0037959	UP	--	--	--	--	--	--	no KO assigned | (RefSeq) uncharacterized protein At1g04910-like	http://www.genome.jp/dbget-bin/www_bget?sot:102580576	--	PREDICTED: uncharacterized protein At1g04910-like isoform X2 [Solanum tuberosum]
150	Novel01934	2358.58	950.586	1.311	4.4776e-08	5.371e-07	UP	--	--	--	--	--	--	--	--	--	--
151	Novel01942	682.351	325.557	1.0676	6.9216e-05	0.00039396	UP	--	--	GO:0044446//GO:0043229//GO:0044422//GO:0031461//GO:0044428//GO:0044424//GO:0005634//GO:0005622//GO:0044464//GO:0005623//GO:0005680//GO:0043231//GO:0005575//GO:0000151//GO:0032991//GO:0043227//GO:1990234//GO:1902494//GO:0043226//GO:0000152	intracellular organelle part//intracellular organelle//organelle part//cullin-RING ubiquitin ligase complex//nuclear part//intracellular part//nucleus//intracellular//cell part//cell//anaphase-promoting complex//intracellular membrane-bounded organelle//cellular_component//ubiquitin ligase complex//protein-containing complex//membrane-bounded organelle//transferase complex//catalytic complex//org…	GO:0046872//GO:0005488//GO:0019787//GO:0046914//GO:0005515//GO:0004842//GO:0043169//GO:0003674//GO:0043167//GO:0008270//GO:0016740//GO:0003824	metal ion binding//binding//ubiquitin-like protein transferase activity//transition metal ion binding//protein binding//ubiquitin-protein transferase activity//cation binding//molecular_function//ion binding//zinc ion binding//transferase activity//catalytic activity	no KO assigned | (RefSeq) E3 ubiquitin-protein ligase CHFR	http://www.genome.jp/dbget-bin/www_bget?sot:102590333	--	PREDICTED: E3 ubiquitin-protein ligase CHFR-like [Solanum tuberosum]
152	Novel01957	273.706	62.7345	2.1253	1.0276e-09	1.7413e-08	UP	GO:0016043//GO:0006996//GO:0071840//GO:0009987//GO:0008150//GO:0051276	cellular component organization//organelle organization//cellular component organization or biogenesis//cellular process//biological_process//chromosome organization	GO:0044464//GO:0005622//GO:0019031//GO:0005623//GO:0043228//GO:0005694//GO:0036338//GO:0043229//GO:0044424//GO:0043232//GO:0043226//GO:0019012//GO:0005575//GO:0019028//GO:0044423	cell part//intracellular//viral envelope//cell//non-membrane-bounded organelle//chromosome//viral membrane//intracellular organelle//intracellular part//intracellular non-membrane-bounded organelle//organelle//virion//cellular_component//viral capsid//virion part	GO:0005515//GO:0017111//GO:0016887//GO:0000166//GO:0001883//GO:0001882//GO:0097367//GO:1901265//GO:0017076//GO:0043168//GO:0005488//GO:0016817//GO:0032549//GO:0032559//GO:0016462//GO:0005198//GO:0097159//GO:1901363//GO:0003824//GO:0030554//GO:0043167//GO:0003674//GO:0016818//GO:0036094//GO:0032553//GO:0005524//GO:0035639//GO:0032555//GO:0016787//GO:0032550	protein binding//nucleoside-triphosphatase activity//ATPase activity//nucleotide binding//purine nucleoside binding//nucleoside binding//carbohydrate derivative binding//nucleoside phosphate binding//purine nucleotide binding//anion binding//binding//hydrolase activity, acting on acid anhydrides//ribonucleoside binding//adenyl ribonucleotide binding//pyrophosphatase activity//structural molecule …	K06674 structural maintenance of chromosome 2 | (RefSeq) structural maintenance of chromosomes protein 2-1	http://www.genome.jp/dbget-bin/www_bget?sot:102595146	--	PREDICTED: structural maintenance of chromosomes protein 2-1-like [Solanum tuberosum]
153	Novel01960	187.527	68.7762	1.4471	0.00012592	0.00066851	UP	--	--	--	--	--	--	--	--	--	--
154	Novel01974	124.217	28.2057	2.1388	4.146e-06	3.1896e-05	UP	GO:0006810//GO:0051234//GO:0008150//GO:0042221//GO:0009987//GO:0015893//GO:0006855//GO:0050896//GO:0042493//GO:0051179//GO:0055085	transport//establishment of localization//biological_process//response to chemical//cellular process//drug transport//drug transmembrane transport//response to stimulus//response to drug//localization//transmembrane transport	GO:0016020//GO:0005575	membrane//cellular_component	GO:0022857//GO:0015238//GO:0015297//GO:0015291//GO:0003674//GO:0005515//GO:0022804//GO:0005215//GO:0005488	transmembrane transporter activity//drug transmembrane transporter activity//antiporter activity//secondary active transmembrane transporter activity//molecular_function//protein binding//active transmembrane transporter activity//transporter activity//binding	K03327 multidrug resistance protein, MATE family | (RefSeq) protein DETOXIFICATION 35-like	http://www.genome.jp/dbget-bin/www_bget?sot:102581313	--	PREDICTED: protein TRANSPARENT TESTA 12-like [Solanum tuberosum]
155	Novel01997	719.554	358.855	1.0037	0.00022919	0.0011403	UP	--	--	--	--	--	--	no KO assigned | (RefSeq) DNA-(apurinic or apyrimidinic site) lyase	http://www.genome.jp/dbget-bin/www_bget?sot:102605533	--	PREDICTED: DNA-(apurinic or apyrimidinic site) lyase-like [Solanum tuberosum]
156	Novel02047	1852.55	678.84	1.4484	4.8237e-09	7.0545e-08	UP	GO:0009987//GO:0006281//GO:0006298//GO:0033554//GO:0008150//GO:0006725//GO:0071704//GO:0044260//GO:0008152//GO:0090304//GO:0044238//GO:0046483//GO:0006807//GO:0050896//GO:0006259//GO:0034641//GO:0043170//GO:0006950//GO:0006974//GO:0051716//GO:0044237//GO:0006139//GO:1901360	cellular process//DNA repair//mismatch repair//cellular response to stress//biological_process//cellular aromatic compound metabolic process//organic substance metabolic process//cellular macromolecule metabolic process//metabolic process//nucleic acid metabolic process//primary metabolic process//heterocycle metabolic process//nitrogen compound metabolic process//response to stimulus//DNA metabo…	--	--	GO:0097159//GO:0030554//GO:0003676//GO:1901363//GO:0003690//GO:0043167//GO:0003674//GO:0036094//GO:0032553//GO:0005524//GO:0032550//GO:0035639//GO:0032555//GO:0001883//GO:0000166//GO:0003677//GO:0001882//GO:1901265//GO:0097367//GO:0017076//GO:0043168//GO:0032549//GO:0032559//GO:0030983//GO:0005488	organic cyclic compound binding//adenyl nucleotide binding//nucleic acid binding//heterocyclic compound binding//double-stranded DNA binding//ion binding//molecular_function//small molecule binding//ribonucleotide binding//ATP binding//purine ribonucleoside binding//purine ribonucleoside triphosphate binding//purine ribonucleotide binding//purine nucleoside binding//nucleotide binding//DNA bindin…	no KO assigned | (RefSeq) protein trichome birefringence-like 42	http://www.genome.jp/dbget-bin/www_bget?sot:102598428	--	PREDICTED: protein trichome birefringence-like 42 [Nicotiana sylvestris]
157	Novel02061	59.1039	22.5192	1.3921	0.0166	0.045544	UP	--	--	--	--	--	--	no KO assigned | (RefSeq) putative GEM-like protein 8	http://www.genome.jp/dbget-bin/www_bget?sot:102583017	--	PREDICTED: putative GEM-like protein 8-like [Solanum tuberosum]
158	Novel02068	40.6187	12.9591	1.6482	0.016016	0.044161	UP	GO:0006950//GO:0009605//GO:0051704//GO:0050896//GO:0006952//GO:0098542//GO:0043207//GO:0042742//GO:0051707//GO:0009617//GO:0008150//GO:0009607	response to stress//response to external stimulus//multi-organism process//response to stimulus//defense response//defense response to other organism//response to external biotic stimulus//defense response to bacterium//response to other organism//response to bacterium//biological_process//response to biotic stimulus	--	--	--	--	no KO assigned | (RefSeq) probable ubiquitin-conjugating enzyme E2 24	http://www.genome.jp/dbget-bin/www_bget?sot:102587224	--	PREDICTED: probable ubiquitin-conjugating enzyme E2 23-like [Solanum tuberosum]
159	Novel02105	45.3229	14.3576	1.6584	0.013725	0.038713	UP	--	--	--	--	--	--	no KO assigned | (RefSeq) putative nuclear RNA export factor SDE5	http://www.genome.jp/dbget-bin/www_bget?sot:102578212	--	PREDICTED: uncharacterized protein LOC101252606 isoform X2 [Solanum lycopersicum]
160	Novel02111	92.8788	21.6405	2.1016	5.2145e-05	0.00030613	UP	--	--	--	--	--	--	no KO assigned | (RefSeq) ABC transporter G family member 35-like	http://www.genome.jp/dbget-bin/www_bget?sot:102603329	--	PREDICTED: uncharacterized protein LOC101261123 [Solanum lycopersicum]
161	Novel02126	3794.57	1397.03	1.4416	7.907e-10	1.376e-08	UP	--	--	--	--	--	--	no KO assigned | (RefSeq) uncharacterized LOC102588763	http://www.genome.jp/dbget-bin/www_bget?sot:102588763	--	PREDICTED: uncharacterized protein LOC102588763 [Solanum tuberosum]
162	Novel02139	2104.56	853.505	1.302	7.6441e-08	8.715e-07	UP	--	--	--	--	--	--	K08869 aarF domain-containing kinase | (RefSeq) uncharacterized protein sll0005	http://www.genome.jp/dbget-bin/www_bget?sot:102586338	--	PREDICTED: uncharacterized aarF domain-containing protein kinase At1g79600, chloroplastic-like [Solanum tuberosum]
163	Novel02160	63.2362	24.4885	1.3686	0.012254	0.035119	UP	--	--	--	--	--	--	no KO assigned | (RefSeq) uncharacterized LOC102604101	http://www.genome.jp/dbget-bin/www_bget?sot:102604101	--	PREDICTED: uncharacterized protein LOC104096924 [Nicotiana tomentosiformis]
164	Novel02165	738.457	332.289	1.1521	1.4101e-05	9.4834e-05	UP	GO:0009987//GO:0044281//GO:0008652//GO:0006082//GO:0009066//GO:0023052//GO:0044283//GO:0044249//GO:0050789//GO:1901566//GO:1901564//GO:0008150//GO:1901605//GO:0071704//GO:1901576//GO:0006520//GO:0043604//GO:0008152//GO:0006529//GO:0044238//GO:0043436//GO:0007165//GO:0043603//GO:0006807//GO:0009058//GO:0050896//GO:0019752//GO:0050794//GO:1901607//GO:0007218//GO:0034641//GO:0065007//GO:0007154//GO:…	cellular process//small molecule metabolic process//cellular amino acid biosynthetic process//organic acid metabolic process//aspartate family amino acid metabolic process//signaling//small molecule biosynthetic process//cellular biosynthetic process//regulation of biological process//organonitrogen compound biosynthetic process//organonitrogen compound metabolic process//biological_process//alph…	GO:0098793//GO:0005575//GO:0097458//GO:0048786//GO:0044464//GO:0005576//GO:0005623//GO:0044456//GO:0045202	presynapse//cellular_component//neuron part//presynaptic active zone//cell part//extracellular region//cell//synapse part//synapse	GO:0003824//GO:0016879//GO:0003674//GO:0016884//GO:0004066//GO:0016874	catalytic activity//ligase activity, forming carbon-nitrogen bonds//molecular_function//carbon-nitrogen ligase activity, with glutamine as amido-N-donor//asparagine synthase (glutamine-hydrolyzing) activity//ligase activity	K01953 asparagine synthase (glutamine-hydrolysing) [EC:6.3.5.4] | (RefSeq) asparagine synthetase [glutamine-hydrolyzing] 2	http://www.genome.jp/dbget-bin/www_bget?sot:102585634	--	PREDICTED: asparagine synthetase [glutamine-hydrolyzing] 2-like [Solanum tuberosum]
165	Novel02174	80.7696	13.4946	2.5814	5.5918e-06	4.1481e-05	UP	--	--	--	--	--	--	K14431 transcription factor TGA | (RefSeq) transcription factor HBP-1b(c38)-like	http://www.genome.jp/dbget-bin/www_bget?sot:102587633	--	PREDICTED: transcription factor HBP-1b(c1)-like isoform X1 [Solanum tuberosum]>gi|565379888|ref|XP_006356349.1| PREDICTED: transcription factor HBP-1b(c1)-like isoform X2 [Solanum tuberosum]
166	Novel02175	129.32	21.9916	2.5559	5.4587e-08	6.4054e-07	UP	GO:0071840//GO:0022607//GO:0006996//GO:0016043//GO:0097031//GO:0032981//GO:0065003//GO:0044085//GO:0043933//GO:0007005//GO:0034622//GO:0033108//GO:0009987//GO:0008150//GO:0010257//GO:0070271	cellular component organization or biogenesis//cellular component assembly//organelle organization//cellular component organization//obsolete mitochondrial respiratory chain complex I biogenesis//mitochondrial respiratory chain complex I assembly//protein-containing complex assembly//cellular component biogenesis//protein-containing complex subunit organization//mitochondrion organization//cellul…	--	--	--	--	no KO assigned | (RefSeq) uncharacterized LOC102600786	http://www.genome.jp/dbget-bin/www_bget?sot:102600786	--	PREDICTED: uncharacterized protein LOC102600786 isoform X1 [Solanum tuberosum]>gi|565357876|ref|XP_006345756.1| PREDICTED: uncharacterized protein LOC102600786 isoform X2 [Solanum tuberosum]
167	Novel02181	362.932	142.3	1.3508	9.9808e-06	6.9825e-05	UP	GO:0008150//GO:0006810//GO:0051234//GO:0051179	biological_process//transport//establishment of localization//localization	GO:0016020//GO:0005575	membrane//cellular_component	GO:0003674//GO:0005215	molecular_function//transporter activity	--	--	--	--
168	Novel02183	56.6994	19.5864	1.5335	0.0094487	0.028175	UP	GO:0071704//GO:0044260//GO:0008152//GO:0006793//GO:0009987//GO:0006796//GO:0043412//GO:0008150//GO:0016310//GO:0043170//GO:0006464//GO:0044237//GO:0044238//GO:0006468//GO:0036211//GO:0019538//GO:0044267	organic substance metabolic process//cellular macromolecule metabolic process//metabolic process//phosphorus metabolic process//cellular process//phosphate-containing compound metabolic process//macromolecule modification//biological_process//phosphorylation//macromolecule metabolic process//cellular protein modification process//cellular metabolic process//primary metabolic process//protein phos…	--	--	GO:0043167//GO:0003674//GO:0036094//GO:0032553//GO:0005524//GO:0016301//GO:0032550//GO:0035639//GO:0032555//GO:0097159//GO:0030554//GO:0003824//GO:1901363//GO:0016740//GO:1901265//GO:0097367//GO:0017076//GO:0043168//GO:0032559//GO:0032549//GO:0005488//GO:0016773//GO:0001883//GO:0000166//GO:0001882//GO:0016772//GO:0004672	ion binding//molecular_function//small molecule binding//ribonucleotide binding//ATP binding//kinase activity//purine ribonucleoside binding//purine ribonucleoside triphosphate binding//purine ribonucleotide binding//organic cyclic compound binding//adenyl nucleotide binding//catalytic activity//heterocyclic compound binding//transferase activity//nucleoside phosphate binding//carbohydrate deriva…	K04730 interleukin-1 receptor-associated kinase 1 [EC:2.7.11.1] | (RefSeq) receptor-like cytosolic serine/threonine-protein kinase RBK1	http://www.genome.jp/dbget-bin/www_bget?sot:102579664	--	PREDICTED: inactive protein kinase SELMODRAFT_444075-like [Solanum tuberosum]
169	Novel02197	369.072	87.8058	2.0715	1.6458e-10	3.2272e-09	UP	GO:0044249//GO:0008150//GO:0006796//GO:0008610//GO:0019637//GO:0009987//GO:0006793//GO:0008152//GO:1901576//GO:0071704//GO:0090407//GO:0006629//GO:0009058//GO:0044238//GO:0044237//GO:0008654//GO:0006644//GO:0044255	cellular biosynthetic process//biological_process//phosphate-containing compound metabolic process//lipid biosynthetic process//organophosphate metabolic process//cellular process//phosphorus metabolic process//metabolic process//organic substance biosynthetic process//organic substance metabolic process//organophosphate biosynthetic process//lipid metabolic process//biosynthetic process//primary…	GO:0005575//GO:0016020	cellular_component//membrane	GO:0016740//GO:0003824//GO:0004143//GO:0016301//GO:0003674//GO:0016772//GO:0016773	transferase activity//catalytic activity//diacylglycerol kinase activity//kinase activity//molecular_function//transferase activity, transferring phosphorus-containing groups//phosphotransferase activity, alcohol group as acceptor	--	--	--	--
170	Novel02207	82.6149	25.0158	1.7236	0.00086874	0.003628	UP	--	--	--	--	--	--	no KO assigned | (RefSeq) uncharacterized LOC102588724	http://www.genome.jp/dbget-bin/www_bget?sot:102588724	--	PREDICTED: uncharacterized protein LOC102588724 [Solanum tuberosum]
171	Novel02208	104.333	14.4111	2.8559	4.9628e-08	5.8793e-07	UP	GO:0009987//GO:0032502//GO:0030154//GO:0023052//GO:0050789//GO:0008150//GO:0007166//GO:0048869//GO:0007219//GO:0007275//GO:0007165//GO:0050896//GO:0050794//GO:0065007//GO:0007154//GO:0032501//GO:0051716	cellular process//developmental process//cell differentiation//signaling//regulation of biological process//biological_process//cell surface receptor signaling pathway//cellular developmental process//Notch signaling pathway//multicellular organism development//signal transduction//response to stimulus//regulation of cellular process//biological regulation//cell communication//multicellular organ…	GO:0016020//GO:0005575//GO:0031224//GO:0016021//GO:0044425	membrane//cellular_component//intrinsic component of membrane//integral component of membrane//membrane part	--	--	no KO assigned | (RefSeq) uncharacterized LOC102585519	http://www.genome.jp/dbget-bin/www_bget?sot:102585519	--	PREDICTED: uncharacterized protein LOC102585519 [Solanum tuberosum]
172	Novel02215	67.9877	15.2936	2.1523	0.0010799	0.0043755	UP	GO:0044260//GO:0071704//GO:0006793//GO:0008152//GO:0006796//GO:0009987//GO:0008150//GO:0043412//GO:0006464//GO:0043170//GO:0016310//GO:0044237//GO:0019538//GO:0006468//GO:0044238//GO:0036211//GO:0044267	cellular macromolecule metabolic process//organic substance metabolic process//phosphorus metabolic process//metabolic process//phosphate-containing compound metabolic process//cellular process//biological_process//macromolecule modification//cellular protein modification process//macromolecule metabolic process//phosphorylation//cellular metabolic process//protein metabolic process//protein phos…	--	--	GO:0003674//GO:0036094//GO:0043167//GO:0035639//GO:0032555//GO:0032550//GO:0016301//GO:0032553//GO:0005524//GO:0097159//GO:0016740//GO:1901363//GO:0030554//GO:0003824//GO:0017076//GO:0097367//GO:1901265//GO:0005488//GO:0032559//GO:0032549//GO:0043168//GO:0016773//GO:0004674//GO:0004672//GO:0001882//GO:0016772//GO:0000166//GO:0001883	molecular_function//small molecule binding//ion binding//purine ribonucleoside triphosphate binding//purine ribonucleotide binding//purine ribonucleoside binding//kinase activity//ribonucleotide binding//ATP binding//organic cyclic compound binding//transferase activity//heterocyclic compound binding//adenyl nucleotide binding//catalytic activity//purine nucleotide binding//carbohydrate derivativ…	no KO assigned | (RefSeq) G-type lectin S-receptor-like serine/threonine-protein kinase At4g27290	http://www.genome.jp/dbget-bin/www_bget?sot:102604444	--	PREDICTED: G-type lectin S-receptor-like serine/threonine-protein kinase At4g27290-like isoform X1 [Solanum tuberosum]
173	Novel02227	157.95	23.7266	2.7349	8.2965e-05	0.0004622	UP	GO:0006793//GO:0009085//GO:0008152//GO:1901576//GO:0043648//GO:0006520//GO:0071704//GO:1901605//GO:0015672//GO:1901566//GO:0044249//GO:1901564//GO:0008150//GO:0006810//GO:0051234//GO:1901136//GO:0030001//GO:0006694//GO:0044283//GO:0006796//GO:0008652//GO:0006082//GO:0055114//GO:0009056//GO:0009066//GO:0019637//GO:0008610//GO:0009987//GO:0046434//GO:0044281//GO:1901362//GO:1901360//GO:0006812//GO:…	phosphorus metabolic process//lysine biosynthetic process//metabolic process//organic substance biosynthetic process//dicarboxylic acid metabolic process//cellular amino acid metabolic process//organic substance metabolic process//alpha-amino acid metabolic process//monovalent inorganic cation transport//organonitrogen compound biosynthetic process//cellular biosynthetic process//organonitrogen c…	--	--	GO:0016628//GO:0003854//GO:0016903//GO:0003674//GO:0036094//GO:0008839//GO:0016229//GO:0016491//GO:0016620//GO:1901363//GO:0003824//GO:0050662//GO:0097159//GO:0005488//GO:0051287//GO:0016616//GO:0048037//GO:0016614//GO:1901265//GO:0033764//GO:0000166//GO:0016627	oxidoreductase activity, acting on the CH-CH group of donors, NAD or NADP as acceptor//3-beta-hydroxy-delta5-steroid dehydrogenase activity//oxidoreductase activity, acting on the aldehyde or oxo group of donors//molecular_function//small molecule binding//4-hydroxy-tetrahydrodipicolinate reductase//steroid dehydrogenase activity//oxidoreductase activity//oxidoreductase activity, acting on the al…	no KO assigned | (RefSeq) isoflavone reductase-like protein	http://www.genome.jp/dbget-bin/www_bget?sot:102596717	--	PREDICTED: isoflavone reductase-like protein [Solanum lycopersicum]
174	Novel02236	198.41	41.5592	2.2552	9.985e-09	1.3743e-07	UP	--	--	--	--	--	--	--	--	--	--
175	Novel02238	110.529	42.4387	1.381	0.0022048	0.0081145	UP	GO:0051179//GO:0006811//GO:0006812//GO:0030001//GO:0008150//GO:0051234//GO:0006810	localization//ion transport//cation transport//metal ion transport//biological_process//establishment of localization//transport	--	--	GO:0043169//GO:0005488//GO:0046872//GO:0043167//GO:0003674	cation binding//binding//metal ion binding//ion binding//molecular_function	no KO assigned | (RefSeq) increased DNA methylation 3-like	http://www.genome.jp/dbget-bin/www_bget?sot:102582147	--	PREDICTED: uncharacterized protein LOC105132811 [Populus euphratica]
176	Novel02239	124.513	38.5056	1.6932	0.00012108	0.00064514	UP	--	--	--	--	--	--	--	--	--	--
177	Novel02241	32.2787	8.27635	1.9635	0.014427	0.040372	UP	--	--	--	--	--	--	--	--	--	--
178	Novel02248	428.358	118.497	1.854	1.5166e-09	2.4672e-08	UP	--	--	--	--	GO:0005515//GO:0046983//GO:0005488//GO:0003674	protein binding//protein dimerization activity//binding//molecular_function	no KO assigned | (RefSeq) transcription factor BEE 1-like	http://www.genome.jp/dbget-bin/www_bget?sot:102599647	--	PREDICTED: transcription factor bHLH75 [Solanum lycopersicum]
179	Novel02249	101.602	25.0491	2.0201	0.00037394	0.0017474	UP	GO:0032268//GO:0006265//GO:0006451//GO:0009059//GO:0043170//GO:0019222//GO:0006417//GO:1901360//GO:0006139//GO:0044271//GO:0043043//GO:0044237//GO:0010467//GO:0006996//GO:0071840//GO:0043603//GO:0006807//GO:0019538//GO:0009058//GO:0044238//GO:0046483//GO:0006412//GO:0090304//GO:0016043//GO:0034641//GO:0006259//GO:0071103//GO:0065007//GO:0006414//GO:0034248//GO:0010468//GO:0044267//GO:0050794//GO:…	regulation of cellular protein metabolic process//DNA topological change//translational readthrough//macromolecule biosynthetic process//macromolecule metabolic process//regulation of metabolic process//regulation of translation//organic cyclic compound metabolic process//nucleobase-containing compound metabolic process//cellular nitrogen compound biosynthetic process//peptide biosynthetic proces…	GO:0016021//GO:0031226//GO:0044424//GO:0044425//GO:0005622//GO:0044464//GO:0031224//GO:0005623//GO:0005575//GO:0005886//GO:0016020//GO:0005887//GO:0005737//GO:0071944//GO:0044459	integral component of membrane//intrinsic component of plasma membrane//intracellular part//membrane part//intracellular//cell part//intrinsic component of membrane//cell//cellular_component//plasma membrane//membrane//integral component of plasma membrane//cytoplasm//cell periphery//plasma membrane part	GO:0003918//GO:0017076//GO:0097367//GO:1901265//GO:0042623//GO:0005488//GO:0061505//GO:0032549//GO:0016817//GO:0032559//GO:0008094//GO:0043168//GO:0003723//GO:0017111//GO:0032561//GO:0001882//GO:0016887//GO:0000166//GO:0003677//GO:0005525//GO:0001883//GO:0003916//GO:0003674//GO:0036094//GO:0016818//GO:0043167//GO:0035639//GO:0032555//GO:0016853//GO:0032550//GO:0016787//GO:0032553//GO:0005524//GO:…	DNA topoisomerase type II (ATP-hydrolyzing) activity//purine nucleotide binding//carbohydrate derivative binding//nucleoside phosphate binding//ATPase activity, coupled//binding//DNA topoisomerase II activity//ribonucleoside binding//hydrolase activity, acting on acid anhydrides//adenyl ribonucleotide binding//DNA-dependent ATPase activity//anion binding//RNA binding//nucleoside-triphosphatase ac…	no KO assigned | (RefSeq) HORMA domain-containing protein 1-like	http://www.genome.jp/dbget-bin/www_bget?sot:102591962	--	PREDICTED: HORMA domain-containing protein 1-like [Solanum tuberosum]
180	Novel02256	3980.01	1732.77	1.1997	2.6808e-07	2.7153e-06	UP	--	--	GO:0043226//GO:0005737//GO:0043231//GO:0005575//GO:0043227//GO:0005739//GO:0005623//GO:0044444//GO:0005622//GO:0044464//GO:0044424//GO:0043229	organelle//cytoplasm//intracellular membrane-bounded organelle//cellular_component//membrane-bounded organelle//mitochondrion//cell//cytoplasmic part//intracellular//cell part//intracellular part//intracellular organelle	GO:0016491//GO:0008137//GO:0003824//GO:0016651//GO:0003954//GO:0003674//GO:0050136//GO:0016655	oxidoreductase activity//NADH dehydrogenase (ubiquinone) activity//catalytic activity//oxidoreductase activity, acting on NAD(P)H//NADH dehydrogenase activity//molecular_function//NADH dehydrogenase (quinone) activity//oxidoreductase activity, acting on NAD(P)H, quinone or similar compound as acceptor	K03963 NADH dehydrogenase (ubiquinone) 1 beta subcomplex subunit 7 | (RefSeq) NADH dehydrogenase [ubiquinone] 1 beta subcomplex subunit 7	http://www.genome.jp/dbget-bin/www_bget?sot:102592146	--	PREDICTED: NADH dehydrogenase [ubiquinone] 1 beta subcomplex subunit 7-like [Solanum tuberosum]
181	Novel02276	253.602	106.079	1.2574	0.00015772	0.00081562	UP	--	--	GO:0043227//GO:0005575//GO:0043231//GO:0005737//GO:0009507//GO:0043226//GO:0009536//GO:0043229//GO:0044424//GO:0044464//GO:0005622//GO:0044444//GO:0005623	membrane-bounded organelle//cellular_component//intracellular membrane-bounded organelle//cytoplasm//chloroplast//organelle//plastid//intracellular organelle//intracellular part//cell part//intracellular//cytoplasmic part//cell	GO:0043167//GO:0003674//GO:0036094//GO:0016818//GO:0032553//GO:0005524//GO:0032550//GO:0016787//GO:0043531//GO:0035639//GO:0032555//GO:0097159//GO:0016462//GO:0003824//GO:0030554//GO:1901363//GO:1901265//GO:0097367//GO:0017076//GO:0043168//GO:0032549//GO:0016817//GO:0032559//GO:0005488//GO:0017111//GO:0005515//GO:0001883//GO:0000166//GO:0016887//GO:0001882	ion binding//molecular_function//small molecule binding//hydrolase activity, acting on acid anhydrides, in phosphorus-containing anhydrides//ribonucleotide binding//ATP binding//purine ribonucleoside binding//hydrolase activity//ADP binding//purine ribonucleoside triphosphate binding//purine ribonucleotide binding//organic cyclic compound binding//pyrophosphatase activity//catalytic activity//ade…	no KO assigned | (RefSeq) putative disease resistance protein RGA3	http://www.genome.jp/dbget-bin/www_bget?sot:102579109	--	PREDICTED: putative disease resistance protein RGA3-like [Solanum tuberosum]>gi|565367056|ref|XP_006350195.1| PREDICTED: putative disease resistance protein RGA3-like [Solanum tuberosum]
182	Novel02277	1394.07	457.965	1.606	3.0573e-10	5.7629e-09	UP	GO:0071704//GO:0006508//GO:0008152//GO:0008150//GO:0043170//GO:0019538//GO:0044238	organic substance metabolic process//proteolysis//metabolic process//biological_process//macromolecule metabolic process//protein metabolic process//primary metabolic process	--	--	GO:0003674//GO:0004185//GO:0008236//GO:0016787//GO:0070011//GO:0004180//GO:0017171//GO:0003824//GO:0008233//GO:0008238//GO:0070008	molecular_function//serine-type carboxypeptidase activity//serine-type peptidase activity//hydrolase activity//peptidase activity, acting on L-amino acid peptides//carboxypeptidase activity//serine hydrolase activity//catalytic activity//peptidase activity//exopeptidase activity//serine-type exopeptidase activity	K16296 serine carboxypeptidase-like clade I [EC:3.4.16.-] | (RefSeq) serine carboxypeptidase-like 17	http://www.genome.jp/dbget-bin/www_bget?sot:102604189	--	PREDICTED: serine carboxypeptidase-like 18-like isoform X1 [Solanum tuberosum]
183	Novel02282	174.308	76.2781	1.1923	0.0016655	0.0063734	UP	GO:0008150//GO:0006508//GO:0008152//GO:0071704//GO:0019538//GO:0044238//GO:0043170	biological_process//proteolysis//metabolic process//organic substance metabolic process//protein metabolic process//primary metabolic process//macromolecule metabolic process	--	--	GO:0003824//GO:0016462//GO:0070011//GO:0016787//GO:0003674//GO:0016818//GO:0016887//GO:0017111//GO:0004176//GO:0042623//GO:0016817//GO:0008233	catalytic activity//pyrophosphatase activity//peptidase activity, acting on L-amino acid peptides//hydrolase activity//molecular_function//hydrolase activity, acting on acid anhydrides, in phosphorus-containing anhydrides//ATPase activity//nucleoside-triphosphatase activity//ATP-dependent peptidase activity//ATPase activity, coupled//hydrolase activity, acting on acid anhydrides//peptidase activi…	--	--	--	PREDICTED: putative ribonuclease H protein At1g65750-like [Solanum tuberosum]
184	Novel02285	289.088	127.153	1.1849	0.0002051	0.0010313	UP	--	--	--	--	--	--	no KO assigned | (RefSeq) protein PHLOEM PROTEIN 2-LIKE A8-like	http://www.genome.jp/dbget-bin/www_bget?sot:102592526	--	PREDICTED: protein PHLOEM PROTEIN 2-LIKE A8-like [Solanum tuberosum]
185	Novel02286	412.188	127.258	1.6955	3.8034e-08	4.6467e-07	UP	--	--	--	--	--	--	--	--	--	--
186	Novel02315	75.9502	17.1488	2.1469	0.00011498	0.00061606	UP	GO:0008150//GO:0071704//GO:0008152	biological_process//organic substance metabolic process//metabolic process	--	--	GO:0003824//GO:0003674//GO:0016853//GO:0016868//GO:0016866	catalytic activity//molecular_function//isomerase activity//intramolecular transferase activity, phosphotransferases//intramolecular transferase activity	K01835 phosphoglucomutase [EC:5.4.2.2] | (RefSeq) PGM, PGM1; phosphoglucomutase, cytoplasmic-like	http://www.genome.jp/dbget-bin/www_bget?sot:102579912	--	hypothetical protein EUGRSUZ_B02942 [Eucalyptus grandis]
187	Novel02327	428.262	17.2322	4.6353	1.4261e-05	9.585e-05	UP	--	--	--	--	--	--	no KO assigned | (RefSeq) uncharacterized LOC102587765	http://www.genome.jp/dbget-bin/www_bget?sot:102587765	--	PREDICTED: uncharacterized protein LOC102587765 [Solanum tuberosum]
188	Novel02328	24.4229	2.57146	3.2476	0.0023631	0.0086208	UP	--	--	--	--	--	--	--	--	--	--
189	Novel02346	199.225	86.422	1.2049	0.00077723	0.0032879	UP	--	--	--	--	--	--	--	--	--	PREDICTED: tRNA(His) guanylyltransferase 1-like isoform X3 [Solanum lycopersicum]
190	Novel02366	1400.4	421.3	1.7329	0.0049864	0.016296	UP	--	--	--	--	--	--	no KO assigned | (RefSeq) uncharacterized LOC102605803	http://www.genome.jp/dbget-bin/www_bget?sot:102605803	--	PREDICTED: uncharacterized protein LOC102605803 [Solanum tuberosum]
191	Novel02377	182.768	88.2911	1.0497	0.0031658	0.011066	UP	--	--	--	--	--	--	K18195 rhamnogalacturonan endolyase [EC:4.2.2.23] | (RefSeq) rhamnogalacturonate lyase-like	http://www.genome.jp/dbget-bin/www_bget?sot:102595358	--	PREDICTED: rhamnogalacturonate lyase B-like [Solanum tuberosum]
192	Novel02379	2040.71	874.049	1.2233	4.2042e-07	4.0923e-06	UP	GO:0009259//GO:0034641//GO:0019693//GO:0009119//GO:1901135//GO:0006091//GO:0009116//GO:0072521//GO:0006807//GO:0009150//GO:0046483//GO:0044238//GO:0009205//GO:0042773//GO:0009167//GO:1901360//GO:0006139//GO:0042278//GO:0006753//GO:0006119//GO:0044237//GO:0009161//GO:0045333//GO:0016310//GO:0042775//GO:1901657//GO:0009199//GO:1901564//GO:0008150//GO:0046128//GO:0006163//GO:0009126//GO:0015980//GO:…	ribonucleotide metabolic process//cellular nitrogen compound metabolic process//ribose phosphate metabolic process//ribonucleoside metabolic process//carbohydrate derivative metabolic process//generation of precursor metabolites and energy//nucleoside metabolic process//purine-containing compound metabolic process//nitrogen compound metabolic process//purine ribonucleotide metabolic process//hete…	--	--	GO:0050136//GO:0016655//GO:0016491//GO:0016651//GO:0003824//GO:0008137//GO:0003954//GO:0003674	NADH dehydrogenase (quinone) activity//oxidoreductase activity, acting on NAD(P)H, quinone or similar compound as acceptor//oxidoreductase activity//oxidoreductase activity, acting on NAD(P)H//catalytic activity//NADH dehydrogenase (ubiquinone) activity//NADH dehydrogenase activity//molecular_function	K15378 solute carrier family 45, member 1/2/4 | (RefSeq) SUT4; sucrose transporter 4	http://www.genome.jp/dbget-bin/www_bget?sot:102577516	--	sucrose transporter 4 [Solanum tuberosum]>gi|160425326|gb|AAG25923.2| sucrose transporter 4 [Solanum tuberosum]
193	Novel02387	26.2976	0.312324	6.3957	1.1557e-05	7.9678e-05	UP	GO:0044238//GO:0006629//GO:0008150//GO:0071704//GO:0008152	primary metabolic process//lipid metabolic process//biological_process//organic substance metabolic process//metabolic process	--	--	--	--	no KO assigned | (RefSeq) patatin-like protein 2	http://www.genome.jp/dbget-bin/www_bget?sot:102605543	--	PREDICTED: patatin-like protein 2 isoform X1 [Solanum lycopersicum]
194	Novel02394	124.718	28.6256	2.1233	2.9032e-06	2.3126e-05	UP	--	--	--	--	--	--	--	--	--	--
195	Novel02407	554.384	219.815	1.3346	2.68e-06	2.1556e-05	UP	--	--	--	--	GO:0005515//GO:0005488//GO:0003674	protein binding//binding//molecular_function	--	--	--	PREDICTED: putative late blight resistance protein homolog R1B-12-like isoform X1 [Solanum tuberosum]>gi|565393791|ref|XP_006362554.1| PREDICTED: putative late blight resistance protein homolog R1B-12-like isoform X2 [Solanum tuberosum]
196	Novel02420	147.897	44.7776	1.7237	2.9561e-05	0.00018464	UP	--	--	--	--	--	--	--	--	--	--
197	Novel02438	42.5886	3.12901	3.7667	1.3921e-05	9.3847e-05	UP	--	--	--	--	--	--	K10730 ATP-dependent DNA helicase Q4 [EC:3.6.4.12] | (RefSeq) ATP-dependent DNA helicase Q-like 5	http://www.genome.jp/dbget-bin/www_bget?sot:102585773	--	PREDICTED: ATP-dependent DNA helicase Q-like 5-like [Solanum tuberosum]
198	Novel02477	155.559	35.8053	2.1192	3.6598e-07	3.6109e-06	UP	--	--	--	--	GO:0097159//GO:0030554//GO:1901363//GO:0036094//GO:0003674//GO:0043167//GO:0032550//GO:0032555//GO:0043531//GO:0032553//GO:0005515//GO:0001882//GO:0001883//GO:0000166//GO:0017076//GO:1901265//GO:0097367//GO:0032559//GO:0032549//GO:0005488//GO:0043168	organic cyclic compound binding//adenyl nucleotide binding//heterocyclic compound binding//small molecule binding//molecular_function//ion binding//purine ribonucleoside binding//purine ribonucleotide binding//ADP binding//ribonucleotide binding//protein binding//nucleoside binding//purine nucleoside binding//nucleotide binding//purine nucleotide binding//nucleoside phosphate binding//carbohydrat…	no KO assigned | (RefSeq) putative late blight resistance protein homolog R1B-13	http://www.genome.jp/dbget-bin/www_bget?sot:102594054	--	PREDICTED: putative late blight resistance protein homolog R1A-3 [Solanum lycopersicum]
199	Novel02481	607.08	253.764	1.2584	0.012209	0.03502	UP	--	--	--	--	--	--	--	--	--	PREDICTED: cyclic nucleotide-gated ion channel 1-like isoform X2 [Solanum tuberosum]
200	Novel02483	32.2097	2.14333	3.9096	0.00010202	0.00055351	UP	--	--	--	--	--	--	--	--	--	--
201	Novel02496	445.805	208.739	1.0947	0.00016903	0.00086717	UP	--	--	--	--	--	--	no KO assigned | (RefSeq) uncharacterized LOC102605079	http://www.genome.jp/dbget-bin/www_bget?sot:102605079	--	PREDICTED: uncharacterized protein LOC102605079 [Solanum tuberosum]
202	Novel02499	6791.21	603.147	3.4931	0.0070104	0.021807	UP	--	--	--	--	GO:0003674//GO:0016853//GO:0016872//GO:0003824	molecular_function//isomerase activity//intramolecular lyase activity//catalytic activity	K01859 chalcone isomerase [EC:5.5.1.6] | (RefSeq) chalcone--flavonone isomerase B-like	http://www.genome.jp/dbget-bin/www_bget?sot:102599379	--	PREDICTED: chalcone--flavonone isomerase-like isoform X1 [Solanum tuberosum]
203	Novel02502	858.039	85.863	3.3209	0.00046568	0.0021127	UP	--	--	--	--	--	--	--	--	--	--
204	Novel02503	134.644	38.0366	1.8237	2.7573e-05	0.00017339	UP	--	--	--	--	--	--	no KO assigned | (RefSeq) mediator of RNA polymerase II transcription subunit 25	http://www.genome.jp/dbget-bin/www_bget?sot:102587552	--	PREDICTED: mediator of RNA polymerase II transcription subunit 25-like [Solanum tuberosum]
205	Novel02508	341.419	67.4322	2.34	1.8096e-11	4.2604e-10	UP	--	--	--	--	--	--	K09422 myb proto-oncogene protein, plant | (RefSeq) myb-related protein A	http://www.genome.jp/dbget-bin/www_bget?sot:102593320	--	putative Myb-like DNA-binding protein [Solanum demissum]
206	Novel02549	272.614	57.6165	2.2423	4.6207e-07	4.4567e-06	UP	--	--	--	--	--	--	no KO assigned | (RefSeq) uncharacterized LOC102596718	http://www.genome.jp/dbget-bin/www_bget?sot:102596718	--	--
207	Novel02554	2324.37	1096.43	1.084	5.7348e-06	4.2415e-05	UP	--	--	--	--	--	--	no KO assigned | (RefSeq) uncharacterized LOC102602976	http://www.genome.jp/dbget-bin/www_bget?sot:102602976	--	BnaA10g28630D, partial [Brassica napus]
208	Novel02582	535.716	72.9425	2.8766	2.4321e-11	5.5885e-10	UP	--	--	--	--	--	--	--	--	--	--
209	Novel02590	67.95	13.1679	2.3674	6.3956e-05	0.00036768	UP	GO:0008150//GO:0008152	biological_process//metabolic process	--	--	GO:0003824//GO:0070569//GO:0016740//GO:0016779//GO:0003674//GO:0016772	catalytic activity//uridylyltransferase activity//transferase activity//nucleotidyltransferase activity//molecular_function//transferase activity, transferring phosphorus-containing groups	K00963 UTP--glucose-1-phosphate uridylyltransferase [EC:2.7.7.9] | (RefSeq) UTP--glucose-1-phosphate uridylyltransferase-like	http://www.genome.jp/dbget-bin/www_bget?sot:102594654	--	PREDICTED: UTP--glucose-1-phosphate uridylyltransferase-like [Solanum tuberosum]
210	Novel02601	949.245	345.135	1.4596	2.8905e-08	3.6165e-07	UP	--	--	--	--	--	--	no KO assigned | (RefSeq) ultraviolet-B receptor UVR8	http://www.genome.jp/dbget-bin/www_bget?sot:102597720	--	PREDICTED: ultraviolet-B receptor UVR8-like isoform X2 [Solanum tuberosum]
211	Novel02602	103.89	43.4363	1.2581	0.0050275	0.016411	UP	GO:0044238//GO:0008150//GO:0071704//GO:0005975//GO:0008152	primary metabolic process//biological_process//organic substance metabolic process//carbohydrate metabolic process//metabolic process	GO:0044464//GO:0005622//GO:0005634//GO:0005623//GO:0043229//GO:0044424//GO:0043226//GO:0043227//GO:0005575//GO:0043231	cell part//intracellular//nucleus//cell//intracellular organelle//intracellular part//organelle//membrane-bounded organelle//cellular_component//intracellular membrane-bounded organelle	GO:0005515//GO:0005488//GO:0016798//GO:0003824//GO:0003674//GO:0004553//GO:0016787	protein binding//binding//hydrolase activity, acting on glycosyl bonds//catalytic activity//molecular_function//hydrolase activity, hydrolyzing O-glycosyl compounds//hydrolase activity	K10728 topoisomerase (DNA) II binding protein 1 | (RefSeq) BRCT domain-containing protein At4g02110-like	http://www.genome.jp/dbget-bin/www_bget?sot:102603882	--	PREDICTED: BRCT domain-containing protein At4g02110-like [Solanum tuberosum]
212	Novel02620	246.233	52.1329	2.2398	5.8483e-10	1.0453e-08	UP	GO:0051179//GO:0008150//GO:0051234//GO:0006810	localization//biological_process//establishment of localization//transport	GO:0016020//GO:0005575	membrane//cellular_component	GO:0005215//GO:0003674	transporter activity//molecular_function	--	--	--	--
213	Novel02640	47.4602	9.96162	2.2523	0.0012223	0.0048761	UP	--	--	--	--	--	--	--	--	--	--
214	Novel02673	26.8137	0	Inf	6.6249e-06	4.8312e-05	UP	--	--	--	--	--	--	--	--	--	--
215	Novel02686	87.3377	35.5666	1.2961	0.0080324	0.024536	UP	--	--	--	--	--	--	no KO assigned | (RefSeq) protein WVD2-like 1	http://www.genome.jp/dbget-bin/www_bget?sot:102586966	--	PREDICTED: RNA polymerase II degradation factor 1 isoform X1 [Solanum lycopersicum]
216	Novel02694	558.164	199.814	1.482	0.00012767	0.00067649	UP	--	--	--	--	--	--	--	--	--	--
217	Novel02703	128.975	35.7474	1.8512	0.0030265	0.010638	UP	--	--	--	--	--	--	K17602 YLP motif-containing protein 1 | (RefSeq) uncharacterized LOC102590443	http://www.genome.jp/dbget-bin/www_bget?sot:102590443	--	PREDICTED: uncharacterized protein LOC102590443 [Solanum tuberosum]
218	Novel02710	6846.83	1571.58	2.1232	1.7168e-12	4.8174e-11	UP	--	--	GO:0016021//GO:0044425//GO:0031224//GO:0005575//GO:0016020	integral component of membrane//membrane part//intrinsic component of membrane//cellular_component//membrane	--	--	K15382 solute carrier family 50 (sugar transporter) | (RefSeq) bidirectional sugar transporter SWEET9-like	http://www.genome.jp/dbget-bin/www_bget?sot:102587377	--	PREDICTED: bidirectional sugar transporter SWEET12-like [Solanum tuberosum]
219	Novel02731	179.041	45.1808	1.9865	6.9391e-07	6.4579e-06	UP	--	--	--	--	--	--	K03665 GTPase | (RefSeq) GTPase HflX	http://www.genome.jp/dbget-bin/www_bget?sot:102603341	--	Os11g0592700, partial [Oryza sativa Japonica Group]>gi|255680229|dbj|BAF28558.2| Os11g0592700, partial [Oryza sativa Japonica Group]
220	Novel02750	160.664	79.9258	1.0073	0.0077623	0.023839	UP	--	--	--	--	--	--	--	--	--	--
221	Novel02772	47.1906	1.94681	4.5993	2.2171e-07	2.2839e-06	UP	--	--	--	--	--	--	--	--	--	--
222	Novel02773	170.238	69.671	1.2889	0.00076341	0.0032396	UP	GO:0006259//GO:0034641//GO:0090304//GO:0044238//GO:0046483//GO:0006807//GO:0009058//GO:0044237//GO:0006139//GO:1901360//GO:0043170//GO:0009059//GO:0008150//GO:0044249//GO:0009987//GO:0006260//GO:0008152//GO:0006725//GO:0034645//GO:0071704//GO:1901576//GO:0044260	DNA metabolic process//cellular nitrogen compound metabolic process//nucleic acid metabolic process//primary metabolic process//heterocycle metabolic process//nitrogen compound metabolic process//biosynthetic process//cellular metabolic process//nucleobase-containing compound metabolic process//organic cyclic compound metabolic process//macromolecule metabolic process//macromolecule biosynthetic …	--	--	GO:0003677//GO:0016772//GO:0043169//GO:0046914//GO:0003899//GO:0005488//GO:0046872//GO:0003824//GO:0003896//GO:0003676//GO:1901363//GO:0016740//GO:0097159//GO:0008270//GO:0043167//GO:0016779//GO:0003674//GO:0034062	DNA binding//transferase activity, transferring phosphorus-containing groups//cation binding//transition metal ion binding//DNA-directed 5'-3' RNA polymerase activity//binding//metal ion binding//catalytic activity//DNA primase activity//nucleic acid binding//heterocyclic compound binding//transferase activity//organic cyclic compound binding//zinc ion binding//ion binding//nucleotidyltransferase…	no KO assigned | (RefSeq) uncharacterized LOC102581412	http://www.genome.jp/dbget-bin/www_bget?sot:102581412	--	PREDICTED: uncharacterized protein LOC102581412 [Solanum tuberosum]
223	Novel02806	82.2018	25.435	1.6924	0.0012262	0.0048898	UP	--	--	--	--	--	--	--	--	--	--
224	Novel02811	14.3837	1.08308	3.7312	0.0099712	0.029502	UP	--	--	--	--	--	--	no KO assigned | (RefSeq) wound-induced basic protein-like	http://www.genome.jp/dbget-bin/www_bget?sot:102581456	--	PREDICTED: wound-induced basic protein-like [Solanum tuberosum]
225	Novel02821	92.9244	35.1068	1.4043	0.003144	0.011002	UP	--	--	--	--	--	--	no KO assigned | (RefSeq) coiled-coil domain-containing protein 15-like	http://www.genome.jp/dbget-bin/www_bget?sot:102593741	--	PREDICTED: uncharacterized protein LOC104090312 [Nicotiana tomentosiformis]
226	Novel02826	300.213	117.807	1.3496	0.0051958	0.016886	UP	GO:0008150//GO:0051234//GO:0006810//GO:0009987//GO:0055085//GO:0051179	biological_process//establishment of localization//transport//cellular process//transmembrane transport//localization	GO:0016020//GO:0005575	membrane//cellular_component	GO:0003674//GO:0005215	molecular_function//transporter activity	K14611 solute carrier family 23 (nucleobase transporter), member 1/2 | (RefSeq) nucleobase-ascorbate transporter 6-like	http://www.genome.jp/dbget-bin/www_bget?sot:102583671	--	PREDICTED: nucleobase-ascorbate transporter 6 [Solanum lycopersicum]>gi|723708482|ref|XP_010322558.1| PREDICTED: nucleobase-ascorbate transporter 6 [Solanum lycopersicum]>gi|62183958|gb|AAX73299.1| putative permease I [Solanum lycopersicum]
227	Novel02828	199.745	54.1393	1.8834	7.4114e-07	6.8503e-06	UP	--	--	--	--	--	--	no KO assigned | (RefSeq) protein MON2 homolog	http://www.genome.jp/dbget-bin/www_bget?sot:102606077	--	PREDICTED: protein MON2 homolog isoform X2 [Solanum tuberosum]
228	Novel02849	21.7439	2.22884	3.2863	0.0042578	0.014248	UP	--	--	--	--	--	--	K10357 myosin V | (RefSeq) myosin-11	http://www.genome.jp/dbget-bin/www_bget?sot:102601504	--	--
229	Novel02851	110.085	48.19	1.1918	0.0069269	0.021579	UP	--	--	--	--	--	--	K11087 small nuclear ribonucleoprotein D1 | (RefSeq) small nuclear ribonucleoprotein Sm D1-like	http://www.genome.jp/dbget-bin/www_bget?sot:102593694	--	PREDICTED: small nuclear ribonucleoprotein Sm D1 [Solanum lycopersicum]>gi|460403318|ref|XP_004247138.1| PREDICTED: small nuclear ribonucleoprotein Sm D1 [Solanum lycopersicum]>gi|565372361|ref|XP_006352764.1| PREDICTED: small nuclear ribonucleoprotein Sm D1-like [Solanum tuberosum]
230	Novel02901	751.006	316.636	1.246	2.5847e-06	2.0903e-05	UP	--	--	--	--	--	--	--	--	--	--
231	Novel02912	73.3367	10.0165	2.8722	0.0057565	0.018438	UP	GO:0007165//GO:0050794//GO:0050896//GO:0065007//GO:0007154//GO:0051716//GO:0009987//GO:0023052//GO:0008150//GO:0050789	signal transduction//regulation of cellular process//response to stimulus//biological regulation//cell communication//cellular response to stimulus//cellular process//signaling//biological_process//regulation of biological process	--	--	GO:0005057//GO:0060089//GO:0004871//GO:0003674	obsolete signal transducer activity, downstream of receptor//molecular transducer activity//obsolete signal transducer activity//molecular_function	--	--	--	PREDICTED: uncharacterized protein LOC101246951 [Solanum lycopersicum]
232	Novel02926	305.781	15.1226	4.3377	3.1804e-26	4.9958e-24	UP	--	--	--	--	--	--	no KO assigned | (RefSeq) protein JASON-like	http://www.genome.jp/dbget-bin/www_bget?sot:102605064	--	PREDICTED: uncharacterized protein LOC102605064 [Solanum tuberosum]
233	Novel02937	81.9672	37.3094	1.1355	0.018298	0.049411	UP	--	--	--	--	--	--	--	--	--	--
234	Novel02959	117.436	23.5239	2.3197	1.6158e-06	1.3709e-05	UP	GO:0008150//GO:1901564//GO:0044249//GO:1901566//GO:0009987//GO:0008152//GO:0034645//GO:0006518//GO:0071704//GO:0043604//GO:1901576//GO:0044260//GO:0044267//GO:0034641//GO:0006412//GO:0044238//GO:0019538//GO:0009058//GO:0006807//GO:0043603//GO:0010467//GO:0044237//GO:0043043//GO:0044271//GO:0043170//GO:0009059	biological_process//organonitrogen compound metabolic process//cellular biosynthetic process//organonitrogen compound biosynthetic process//cellular process//metabolic process//cellular macromolecule biosynthetic process//peptide metabolic process//organic substance metabolic process//amide biosynthetic process//organic substance biosynthetic process//cellular macromolecule metabolic process//cel…	GO:0043226//GO:0005737//GO:0005840//GO:0032991//GO:0005575//GO:0044444//GO:0005623//GO:0043228//GO:0044464//GO:0005622//GO:0044424//GO:0043232//GO:0043229	organelle//cytoplasm//ribosome//protein-containing complex//cellular_component//cytoplasmic part//cell//non-membrane-bounded organelle//cell part//intracellular//intracellular part//intracellular non-membrane-bounded organelle//intracellular organelle	GO:0005198//GO:0003735//GO:0003674	structural molecule activity//structural constituent of ribosome//molecular_function	no KO assigned | (RefSeq) uncharacterized LOC102605080	http://www.genome.jp/dbget-bin/www_bget?sot:102605080	--	PREDICTED: uncharacterized protein LOC102605080 [Solanum tuberosum]
235	Novel02961	86.1572	26.4599	1.7032	0.00071151	0.0030473	UP	--	--	--	--	--	--	--	--	--	--
236	Novel02965	207.449	91.8166	1.1759	0.00081821	0.0034441	UP	--	--	--	--	--	--	no KO assigned | (RefSeq) protein yippee-like At5g53940	http://www.genome.jp/dbget-bin/www_bget?sot:102595997	--	PREDICTED: protein yippee-like At5g53940-like isoform X2 [Solanum tuberosum]
237	Novel02981	22.2172	3.83879	2.533	0.017024	0.046514	UP	--	--	--	--	--	--	--	--	--	--
238	Novel03002	1150.38	520.431	1.1443	5.0376e-06	3.7875e-05	UP	--	--	GO:0016020//GO:0005575	membrane//cellular_component	--	--	K14347 solute carrier family 10 (sodium/bile acid cotransporter), member 7 | (RefSeq) probable sodium/metabolite cotransporter BASS4, chloroplastic	http://www.genome.jp/dbget-bin/www_bget?sot:102583020	--	PREDICTED: probable sodium/metabolite cotransporter BASS4, chloroplastic-like [Solanum tuberosum]
239	Novel03007	142.94	12.3165	3.5368	5.7518e-13	1.746e-11	UP	GO:0009059//GO:0007154//GO:0043170//GO:0006139//GO:1901360//GO:0009605//GO:0051716//GO:0044237//GO:0006974//GO:0006950//GO:0009058//GO:0006807//GO:0044238//GO:0046483//GO:0090304//GO:0034641//GO:0006259//GO:0050896//GO:1901576//GO:0044260//GO:0071496//GO:0034645//GO:0071704//GO:0006725//GO:0009991//GO:0008152//GO:0006260//GO:0033554//GO:0031668//GO:0006281//GO:0009987//GO:0044249//GO:0008150//GO:…	macromolecule biosynthetic process//cell communication//macromolecule metabolic process//nucleobase-containing compound metabolic process//organic cyclic compound metabolic process//response to external stimulus//cellular response to stimulus//cellular metabolic process//cellular response to DNA damage stimulus//response to stress//biosynthetic process//nitrogen compound metabolic process//primar…	--	--	GO:0017076//GO:0097367//GO:1901265//GO:0005488//GO:0016817//GO:0032549//GO:0032559//GO:0043168//GO:0017111//GO:0003678//GO:0001882//GO:0000166//GO:0003677//GO:0001883//GO:0016818//GO:0036094//GO:0003674//GO:0043167//GO:0032555//GO:0035639//GO:0016787//GO:0032550//GO:0005524//GO:0032553//GO:0004386//GO:0016462//GO:0097159//GO:1901363//GO:0003697//GO:0003676//GO:0003824//GO:0030554	purine nucleotide binding//carbohydrate derivative binding//nucleoside phosphate binding//binding//hydrolase activity, acting on acid anhydrides//ribonucleoside binding//adenyl ribonucleotide binding//anion binding//nucleoside-triphosphatase activity//DNA helicase activity//nucleoside binding//nucleotide binding//DNA binding//purine nucleoside binding//hydrolase activity, acting on acid anhydride…	K04482 DNA repair protein RAD51 | (RefSeq) DNA repair protein RAD51 homolog	http://www.genome.jp/dbget-bin/www_bget?sot:102587795	--	PREDICTED: DNA repair protein RAD51 homolog [Solanum tuberosum]
240	Novel03008	182.1	61.2005	1.5731	2.4929e-05	0.00015827	UP	--	--	--	--	--	--	K16297 serine carboxypeptidase-like clade II [EC:3.4.16.-] | (RefSeq) serine carboxypeptidase-like 40	http://www.genome.jp/dbget-bin/www_bget?sot:102578625	--	Polyprotein, putative [Solanum demissum]
241	Novel03042	177.056	54.781	1.6925	3.1985e-05	0.00019828	UP	--	--	--	--	--	--	--	--	--	hypothetical protein SDM1_52t00015 [Solanum demissum]
242	Novel03060	47.7483	16.4185	1.5401	0.015857	0.043804	UP	--	--	--	--	--	--	--	--	--	PREDICTED: uncharacterized protein LOC104648389 [Solanum lycopersicum]
243	Novel03075	167.827	82.0409	1.0326	0.0056166	0.018041	UP	--	--	--	--	--	--	no KO assigned | (RefSeq) ankyrin repeat-containing protein At5g02620-like	http://www.genome.jp/dbget-bin/www_bget?sot:102599160	--	PREDICTED: ankyrin repeat-containing protein At5g02620-like isoform X1 [Solanum tuberosum]>gi|565363285|ref|XP_006348368.1| PREDICTED: ankyrin repeat-containing protein At5g02620-like isoform X2 [Solanum tuberosum]
244	Novel03079	672.798	296.901	1.1802	1.3601e-05	9.2001e-05	UP	GO:0043170//GO:0016310//GO:0006464//GO:0044237//GO:0006468//GO:0044238//GO:0036211//GO:0019538//GO:0044267//GO:0071704//GO:0044260//GO:0008152//GO:0006793//GO:0009987//GO:0006796//GO:0043412//GO:0008150	macromolecule metabolic process//phosphorylation//cellular protein modification process//cellular metabolic process//protein phosphorylation//primary metabolic process//protein modification process//protein metabolic process//cellular protein metabolic process//organic substance metabolic process//cellular macromolecule metabolic process//metabolic process//phosphorus metabolic process//cellular …	--	--	GO:0097367//GO:1901265//GO:0017076//GO:0043168//GO:0005488//GO:0032559//GO:0032549//GO:0016773//GO:0005515//GO:0000166//GO:0001883//GO:0004672//GO:0001882//GO:0016772//GO:0043167//GO:0003674//GO:0036094//GO:0016301//GO:0032553//GO:0005524//GO:0035639//GO:0032555//GO:0032550//GO:0097159//GO:1901363//GO:0030554//GO:0003824//GO:0016740	carbohydrate derivative binding//nucleoside phosphate binding//purine nucleotide binding//anion binding//binding//adenyl ribonucleotide binding//ribonucleoside binding//phosphotransferase activity, alcohol group as acceptor//protein binding//nucleotide binding//purine nucleoside binding//protein kinase activity//nucleoside binding//transferase activity, transferring phosphorus-containing groups//…	no KO assigned | (RefSeq) protein SPA1-RELATED 4-like	http://www.genome.jp/dbget-bin/www_bget?sot:102590416	--	PREDICTED: protein SPA1-RELATED 3-like isoform X1 [Solanum tuberosum]
245	Novel03080	102.686	44.3477	1.2113	0.0071239	0.022093	UP	--	--	--	--	--	--	K07152 protein SCO1/2 | (RefSeq) protein SCO1 homolog 1, mitochondrial	http://www.genome.jp/dbget-bin/www_bget?sot:102589218	--	PREDICTED: protein SCO1 homolog 1, mitochondrial [Erythranthe guttatus]>gi|604313347|gb|EYU26678.1| hypothetical protein MIMGU_mgv1a009582mg [Erythranthe guttata]
246	Novel03083	7275.82	2941.39	1.3066	1.8422e-08	2.4019e-07	UP	GO:0044237//GO:0044271//GO:1901360//GO:0006139//GO:0019222//GO:0043170//GO:0009059//GO:0019219//GO:0006464//GO:0034654//GO:0060255//GO:0010556//GO:0018130//GO:0050794//GO:0070647//GO:0044267//GO:0065007//GO:0032774//GO:0010468//GO:0006259//GO:0034641//GO:0070646//GO:0016070//GO:0090304//GO:0036211//GO:0016579//GO:0046483//GO:0044238//GO:0019538//GO:0009058//GO:0006807//GO:0010467//GO:0008152//GO:…	cellular metabolic process//cellular nitrogen compound biosynthetic process//organic cyclic compound metabolic process//nucleobase-containing compound metabolic process//regulation of metabolic process//macromolecule metabolic process//macromolecule biosynthetic process//regulation of nucleobase-containing compound metabolic process//cellular protein modification process//nucleobase-containing co…	GO:0044215//GO:0018995//GO:0033648//GO:0043656//GO:0033643//GO:0044217//GO:0044216//GO:0033647//GO:0033646//GO:0005575//GO:0043657//GO:0042025	other organism//host//host intracellular membrane-bounded organelle//intracellular region of host//host cell part//other organism part//other organism cell//host intracellular organelle//host intracellular part//cellular_component//host cell//host cell nucleus	GO:0005488//GO:0046872//GO:0003677//GO:0043169//GO:0046914//GO:0036459//GO:0008270//GO:0016787//GO:0043167//GO:0003700//GO:0003674//GO:0003824//GO:1901363//GO:0003676//GO:0097159	binding//metal ion binding//DNA binding//cation binding//transition metal ion binding//thiol-dependent ubiquitinyl hydrolase activity//zinc ion binding//hydrolase activity//ion binding//DNA-binding transcription factor activity//molecular_function//catalytic activity//heterocyclic compound binding//nucleic acid binding//organic cyclic compound binding	K11836 ubiquitin carboxyl-terminal hydrolase 5/13 [EC:3.4.19.12] | (RefSeq) ubiquitin carboxyl-terminal hydrolase 14	http://www.genome.jp/dbget-bin/www_bget?sot:102583138	--	PREDICTED: ubiquitin carboxyl-terminal hydrolase 14-like [Solanum tuberosum]
247	Novel03100	840.412	313.09	1.4245	1.0462e-07	1.1559e-06	UP	--	--	--	--	--	--	K02516 type II protein arginine methyltransferase [EC:2.1.1.320] | (RefSeq) protein arginine N-methyltransferase 1.5	http://www.genome.jp/dbget-bin/www_bget?sot:102597573	--	PREDICTED: protein arginine N-methyltransferase 1.5-like isoform X1 [Solanum tuberosum]
248	Novel03101	88.4891	33.6886	1.3932	0.0049574	0.01622	UP	--	--	--	--	GO:0003674//GO:0016746//GO:0003824//GO:0016740//GO:0016747	molecular_function//transferase activity, transferring acyl groups//catalytic activity//transferase activity//transferase activity, transferring acyl groups other than amino-acyl groups	no KO assigned | (RefSeq) uncharacterized acetyltransferase At3g50280-like	http://www.genome.jp/dbget-bin/www_bget?sot:102590312	--	PREDICTED: uncharacterized acetyltransferase At3g50280-like [Solanum tuberosum]
249	Novel03131	1971.44	884.805	1.1558	1.6472e-06	1.3941e-05	UP	GO:0009059//GO:0019219//GO:0019222//GO:0043170//GO:0044271//GO:0006139//GO:1901360//GO:0044237//GO:0009058//GO:0006807//GO:0010467//GO:0090304//GO:0044238//GO:0046483//GO:0010468//GO:0032774//GO:0065007//GO:0016070//GO:0034641//GO:0010556//GO:0060255//GO:0034654//GO:0050794//GO:0018130//GO:1901576//GO:0044260//GO:2001141//GO:0006725//GO:0071704//GO:0097659//GO:0034645//GO:0006351//GO:1903506//GO:…	macromolecule biosynthetic process//regulation of nucleobase-containing compound metabolic process//regulation of metabolic process//macromolecule metabolic process//cellular nitrogen compound biosynthetic process//nucleobase-containing compound metabolic process//organic cyclic compound metabolic process//cellular metabolic process//biosynthetic process//nitrogen compound metabolic process//gene…	--	--	GO:0005488//GO:0003677//GO:0003674//GO:0097159//GO:1901363//GO:0003676	binding//DNA binding//molecular_function//organic cyclic compound binding//heterocyclic compound binding//nucleic acid binding	K06990 MEMO1 family protein | (RefSeq) protein MEMO1	http://www.genome.jp/dbget-bin/www_bget?sot:102597501	--	PREDICTED: protein MEMO1-like [Solanum tuberosum]
250	Novel03136	166.685	63.1034	1.4013	0.00026746	0.001304	UP	GO:0009792//GO:0032502//GO:0009987//GO:0001700//GO:0008150//GO:0050789//GO:0023052//GO:0032501//GO:0007154//GO:0007259//GO:0048856//GO:0009790//GO:0051716//GO:0035556//GO:0007165//GO:0007275//GO:0065007//GO:0050896//GO:0050794	embryo development ending in birth or egg hatching//developmental process//cellular process//embryonic development via the syncytial blastoderm//biological_process//regulation of biological process//signaling//multicellular organismal process//cell communication//JAK-STAT cascade//anatomical structure development//embryo development//cellular response to stimulus//intracellular signal transductio…	--	--	--	--	--	--	--	PREDICTED: uncharacterized protein LOC104102933 isoform X3 [Nicotiana tomentosiformis]>gi|697110408|ref|XP_009609071.1| PREDICTED: uncharacterized protein LOC104102933 isoform X4 [Nicotiana tomentosiformis]
251	Novel03150	93.0896	21.0148	2.1472	0.0031522	0.011026	UP	--	--	--	--	--	--	--	--	--	--
252	Novel03168	25.2598	3.71109	2.7669	0.006907	0.021526	UP	--	--	--	--	--	--	K12842 U2-associated protein SR140 | (RefSeq) U2 snRNP-associated SURP motif-containing protein-like	http://www.genome.jp/dbget-bin/www_bget?sot:102583876	--	PREDICTED: U2 snRNP-associated SURP motif-containing protein-like isoform X3 [Solanum tuberosum]
253	Novel03174	45.3397	1.89811	4.5781	4.3545e-07	4.2233e-06	UP	--	--	--	--	--	--	K13459 disease resistance protein RPS2 | (RefSeq) probable disease resistance protein At4g27220	http://www.genome.jp/dbget-bin/www_bget?sot:102599763	--	PREDICTED: probable disease resistance protein At4g27220-like [Solanum tuberosum]
254	Novel03192	117.075	26.8475	2.1246	5.2173e-06	3.9065e-05	UP	GO:0006725//GO:0071704//GO:0097659//GO:0006351//GO:0034645//GO:1901576//GO:0044260//GO:2001141//GO:0008152//GO:0000917//GO:1902410//GO:0000281//GO:0051252//GO:0061640//GO:0090529//GO:1903047//GO:0032505//GO:1903506//GO:1901362//GO:0080090//GO:0051171//GO:0009987//GO:0000278//GO:0019438//GO:2000112//GO:0031326//GO:0008150//GO:0006355//GO:0050789//GO:0031323//GO:0044249//GO:0009889//GO:0019222//GO:…	cellular aromatic compound metabolic process//organic substance metabolic process//nucleic acid-templated transcription//transcription, DNA-templated//cellular macromolecule biosynthetic process//organic substance biosynthetic process//cellular macromolecule metabolic process//regulation of RNA biosynthetic process//metabolic process//division septum assembly//mitotic cytokinetic process//mitotic…	GO:0005575//GO:0005737//GO:0044424//GO:0044464//GO:0005622//GO:0005623	cellular_component//cytoplasm//intracellular part//cell part//intracellular//cell	GO:0003700//GO:0003674//GO:0097159//GO:1901363//GO:0003676//GO:0043565//GO:0005488//GO:0003677	DNA-binding transcription factor activity//molecular_function//organic cyclic compound binding//heterocyclic compound binding//nucleic acid binding//sequence-specific DNA binding//binding//DNA binding	no KO assigned | (RefSeq) bZIP transcription factor 17-like	http://www.genome.jp/dbget-bin/www_bget?sot:102586568	--	PREDICTED: uncharacterized protein LOC102586568 [Solanum tuberosum]
255	Novel03209	126.465	29.33	2.1083	0.00013414	0.00070647	UP	GO:0055085//GO:0051179//GO:0008150//GO:0006810//GO:0051234//GO:0009987	transmembrane transport//localization//biological_process//transport//establishment of localization//cellular process	GO:0044425//GO:0031226//GO:0016021//GO:0005623//GO:0031224//GO:0044464//GO:0005887//GO:0071944//GO:0005575//GO:0016020//GO:0005886//GO:0044459	membrane part//intrinsic component of plasma membrane//integral component of membrane//cell//intrinsic component of membrane//cell part//integral component of plasma membrane//cell periphery//cellular_component//membrane//plasma membrane//plasma membrane part	GO:0005215//GO:0003674	transporter activity//molecular_function	K14638 solute carrier family 15 (peptide/histidine transporter), member 3/4 | (RefSeq) protein NRT1/ PTR FAMILY 7.3-like	http://www.genome.jp/dbget-bin/www_bget?sot:102588731	--	PREDICTED: nitrate transporter 1.5-like [Solanum tuberosum]
256	Novel03232	94.9068	7.59858	3.6427	8.8831e-10	1.527e-08	UP	--	--	--	--	--	--	no KO assigned | (RefSeq) uncharacterized protein At4g22758-like	http://www.genome.jp/dbget-bin/www_bget?sot:102605561	--	PREDICTED: uncharacterized protein At4g22758-like [Solanum tuberosum]
257	Novel03253	8.79852	0	Inf	0.013158	0.037386	UP	GO:0008152//GO:0055114//GO:0008150	metabolic process//oxidation-reduction process//biological_process	--	--	GO:0003674//GO:0043167//GO:0016701//GO:0051213//GO:0016491//GO:0003824//GO:0016702//GO:0046872//GO:0005488//GO:0043169	molecular_function//ion binding//oxidoreductase activity, acting on single donors with incorporation of molecular oxygen//dioxygenase activity//oxidoreductase activity//catalytic activity//oxidoreductase activity, acting on single donors with incorporation of molecular oxygen, incorporation of two atoms of oxygen//metal ion binding//binding//cation binding	K15718 linoleate 9S-lipoxygenase [EC:1.13.11.58] | (RefSeq) 5-lipoxygenase	http://www.genome.jp/dbget-bin/www_bget?sot:102577615	--	5-lipoxygenase [Solanum tuberosum]>gi|2789652|gb|AAD04258.1| 5-lipoxygenase [Solanum tuberosum]
258	Novel03262	129.14	41.3113	1.6443	0.00012659	0.00067137	UP	--	--	--	--	--	--	--	--	--	--
259	Novel03278	39.1207	9.86998	1.9868	0.0080113	0.024482	UP	--	--	--	--	--	--	--	--	--	--
260	Novel03286	1808.94	593.221	1.6085	1.0029e-10	2.0533e-09	UP	--	--	--	--	--	--	K13606 chlorophyll(ide) b reductase [EC:1.1.1.294] | (RefSeq) chlorophyll(ide) b reductase NOL, chloroplastic	http://www.genome.jp/dbget-bin/www_bget?sot:102594861	--	PREDICTED: chlorophyll(ide) b reductase NOL, chloroplastic isoform X3 [Nicotiana sylvestris]
261	Novel03287	72.4491	30.2724	1.259	0.015062	0.04188	UP	--	--	--	--	--	--	K12194 charged multivesicular body protein 4 | (RefSeq) vacuolar protein sorting-associated protein 32 homolog 2	http://www.genome.jp/dbget-bin/www_bget?sot:102604550	--	PREDICTED: vacuolar protein sorting-associated protein 32 homolog 2 [Solanum lycopersicum]
262	Novel03289	378.208	162.668	1.2173	4.8075e-05	0.0002846	UP	--	--	--	--	--	--	no KO assigned | (RefSeq) uncharacterized LOC102588593	http://www.genome.jp/dbget-bin/www_bget?sot:102588593	--	PREDICTED: uncharacterized protein LOC102588593 [Solanum tuberosum]
263	Novel03302	63.0095	22.7747	1.4681	0.0090771	0.027238	UP	--	--	--	--	--	--	--	--	--	--
264	Novel03306	35.2519	4.03397	3.1274	0.00029167	0.0014084	UP	--	--	--	--	--	--	no KO assigned | (RefSeq) uncharacterized LOC102586991	http://www.genome.jp/dbget-bin/www_bget?sot:102586991	--	Integrase core domain containing protein [Solanum demissum]
265	Novel03315	106.189	29.3664	1.8544	0.00011886	0.00063446	UP	--	--	--	--	--	--	--	--	--	--
266	Novel03317	51.4833	11.4684	2.1664	0.0013198	0.0052096	UP	--	--	--	--	--	--	K08850 aurora kinase, other [EC:2.7.11.1] | (RefSeq) serine/threonine-protein kinase Aurora-2	http://www.genome.jp/dbget-bin/www_bget?sot:102596793	--	PREDICTED: serine/threonine-protein kinase Aurora-1-like [Solanum tuberosum]
267	Novel03351	147.109	31.6361	2.2172	3.8607e-07	3.7865e-06	UP	GO:0009892//GO:0019222//GO:0065007//GO:0009058//GO:0008152//GO:0009889//GO:0050789//GO:0009890//GO:0008150//GO:0048519	negative regulation of metabolic process//regulation of metabolic process//biological regulation//biosynthetic process//metabolic process//regulation of biosynthetic process//regulation of biological process//negative regulation of biosynthetic process//biological_process//negative regulation of biological process	--	--	GO:0005488//GO:0005515//GO:0003674	binding//protein binding//molecular_function	no KO assigned | (RefSeq) putative disease resistance protein RGA1	http://www.genome.jp/dbget-bin/www_bget?sot:102579076	--	PREDICTED: putative disease resistance protein RGA1-like [Solanum tuberosum]
268	Novel03361	148.391	41.4724	1.8392	1.0963e-05	7.6028e-05	UP	--	--	--	--	--	--	no KO assigned | (RefSeq) ribokinase-like	http://www.genome.jp/dbget-bin/www_bget?sot:102586184	--	PREDICTED: LOW QUALITY PROTEIN: probable fructokinase-3-like [Solanum tuberosum]
269	Novel03394	33.8634	9.30631	1.8634	0.01741	0.047406	UP	--	--	GO:0016020//GO:0005575	membrane//cellular_component	GO:0003824//GO:0030554//GO:1901363//GO:0016788//GO:0019001//GO:0097159//GO:0016462//GO:0098519//GO:0005524//GO:0032553//GO:0032550//GO:0016787//GO:0032555//GO:0035639//GO:0043167//GO:0036094//GO:0016818//GO:0003674//GO:0016791//GO:0001883//GO:0005525//GO:0042578//GO:0000166//GO:0016887//GO:0001882//GO:0032561//GO:0017111//GO:0043168//GO:0003924//GO:0032549//GO:0016817//GO:0032559//GO:0005488//GO:…	catalytic activity//adenyl nucleotide binding//heterocyclic compound binding//hydrolase activity, acting on ester bonds//guanyl nucleotide binding//organic cyclic compound binding//pyrophosphatase activity//nucleotide phosphatase activity, acting on free nucleotides//ATP binding//ribonucleotide binding//purine ribonucleoside binding//hydrolase activity//purine ribonucleotide binding//purine ribon…	no KO assigned | (RefSeq) putative white-brown complex homolog protein 30	http://www.genome.jp/dbget-bin/www_bget?sot:102597657	--	PREDICTED: putative white-brown complex homolog protein 30-like [Solanum tuberosum]
270	Novel03396	2334.36	693.294	1.7515	1.2213e-12	3.5067e-11	UP	GO:0071704//GO:0044260//GO:0008152//GO:0006793//GO:0009987//GO:0006796//GO:0043412//GO:0008150//GO:0043170//GO:0016310//GO:0006464//GO:0044237//GO:0044238//GO:0006468//GO:0036211//GO:0019538//GO:0044267	organic substance metabolic process//cellular macromolecule metabolic process//metabolic process//phosphorus metabolic process//cellular process//phosphate-containing compound metabolic process//macromolecule modification//biological_process//macromolecule metabolic process//phosphorylation//cellular protein modification process//cellular metabolic process//primary metabolic process//protein phos…	--	--	GO:0043167//GO:0003674//GO:0036094//GO:0016301//GO:0032553//GO:0005524//GO:0035639//GO:0032555//GO:0032550//GO:0097159//GO:1901363//GO:0030554//GO:0003824//GO:0016740//GO:0097367//GO:1901265//GO:0017076//GO:0004715//GO:0043168//GO:0005488//GO:0032559//GO:0032549//GO:0016773//GO:0004713//GO:0000166//GO:0001883//GO:0004672//GO:0001882//GO:0016772	ion binding//molecular_function//small molecule binding//kinase activity//ribonucleotide binding//ATP binding//purine ribonucleoside triphosphate binding//purine ribonucleotide binding//purine ribonucleoside binding//organic cyclic compound binding//heterocyclic compound binding//adenyl nucleotide binding//catalytic activity//transferase activity//carbohydrate derivative binding//nucleoside phosp…	K14638 solute carrier family 15 (peptide/histidine transporter), member 3/4 | (RefSeq) protein NRT1/ PTR FAMILY 2.3-like	http://www.genome.jp/dbget-bin/www_bget?sot:102582054	--	PREDICTED: probable nitrate excretion transporter 3-like [Solanum tuberosum]
271	Novel03397	15.1326	1.34057	3.4967	0.013206	0.0375	UP	GO:0023052//GO:0050789//GO:0008150//GO:0009987//GO:0051716//GO:0007154//GO:0050896//GO:0050794//GO:0065007//GO:0007165	signaling//regulation of biological process//biological_process//cellular process//cellular response to stimulus//cell communication//response to stimulus//regulation of cellular process//biological regulation//signal transduction	GO:0005737//GO:0005739//GO:0043227//GO:0005575//GO:0043231//GO:0043226//GO:0044424//GO:0043229//GO:0005623//GO:0044444//GO:0044464//GO:0005622	cytoplasm//mitochondrion//membrane-bounded organelle//cellular_component//intracellular membrane-bounded organelle//organelle//intracellular part//intracellular organelle//cell//cytoplasmic part//cell part//intracellular	GO:0003674//GO:0005488//GO:0005515	molecular_function//binding//protein binding	no KO assigned | (RefSeq) toll/interleukin-1 receptor-like protein	http://www.genome.jp/dbget-bin/www_bget?sot:102596837	--	PREDICTED: TMV resistance protein N-like [Solanum tuberosum]
272	Novel03412	123.411	37.7521	1.7088	0.00082538	0.0034703	UP	--	--	--	--	--	--	--	--	--	--
273	Novel03418	260.486	31.4141	3.0517	3.7826e-12	9.9028e-11	UP	--	--	--	--	--	--	no KO assigned | (RefSeq) uncharacterized LOC102595796	http://www.genome.jp/dbget-bin/www_bget?sot:102595796	--	PREDICTED: stress response protein nst1-like isoform X1 [Solanum tuberosum]>gi|565382799|ref|XP_006357719.1| PREDICTED: stress response protein nst1-like isoform X2 [Solanum tuberosum]
274	Novel03424	84.3707	16.6478	2.3414	1.9549e-05	0.00012734	UP	--	--	--	--	--	--	--	--	--	--
275	Novel03425	88.4479	8.49741	3.3797	1.1539e-08	1.5722e-07	UP	--	--	--	--	--	--	no KO assigned | (RefSeq) embryonic stem cell-specific 5-hydroxymethylcytosine-binding protein	http://www.genome.jp/dbget-bin/www_bget?sot:102588447	--	PREDICTED: embryonic stem cell-specific 5-hydroxymethylcytosine-binding protein isoform X2 [Nicotiana tomentosiformis]
276	Novel03434	584.24	256.994	1.1848	2.2042e-05	0.00014179	UP	GO:0051301//GO:0044237//GO:0000279//GO:0022402//GO:0000226//GO:0051128//GO:0043170//GO:0032886//GO:0033043//GO:0044848//GO:0065007//GO:0070507//GO:0044267//GO:0050794//GO:0022403//GO:0006996//GO:0071840//GO:0019538//GO:0007010//GO:0051322//GO:0044238//GO:0007049//GO:0016043//GO:0007017//GO:0007059//GO:1903047//GO:0000087//GO:0000090//GO:0008152//GO:0044260//GO:0071704//GO:0098763//GO:0050789//GO:…	cell division//cellular metabolic process//M phase//cell cycle process//microtubule cytoskeleton organization//regulation of cellular component organization//macromolecule metabolic process//regulation of microtubule-based process//regulation of organelle organization//biological phase//biological regulation//regulation of microtubule cytoskeleton organization//cellular protein metabolic process/…	GO:0043232//GO:0044424//GO:0005874//GO:0044422//GO:0044446//GO:0043229//GO:0016272//GO:0005694//GO:0000777//GO:0044427//GO:0043228//GO:0005819//GO:0005623//GO:0005622//GO:0044464//GO:0000793//GO:0005876//GO:0000776//GO:0000779//GO:0005575//GO:0032991//GO:0015630//GO:0005856//GO:0098687//GO:0044430//GO:0000940//GO:0000775//GO:0043226	intracellular non-membrane-bounded organelle//intracellular part//microtubule//organelle part//intracellular organelle part//intracellular organelle//prefoldin complex//chromosome//condensed chromosome kinetochore//chromosomal part//non-membrane-bounded organelle//spindle//cell//intracellular//cell part//condensed chromosome//spindle microtubule//kinetochore//condensed chromosome, centromeric reg…	GO:0005488//GO:0008017//GO:0005515//GO:0044877//GO:0051082//GO:0008092//GO:0015631//GO:0003674	binding//microtubule binding//protein binding//protein-containing complex binding//unfolded protein binding//cytoskeletal protein binding//tubulin binding//molecular_function	no KO assigned | (RefSeq) protein FAR1-RELATED SEQUENCE 5-like	http://www.genome.jp/dbget-bin/www_bget?sot:102592457	--	PREDICTED: protein FAR1-RELATED SEQUENCE 5-like isoform X1 [Solanum tuberosum]
277	Novel03455	49.7307	9.30325	2.4183	0.00032462	0.0015469	UP	GO:0046483//GO:0044238//GO:0090304//GO:0006807//GO:0006310//GO:0034641//GO:0006259//GO:0043170//GO:0006313//GO:0044237//GO:1901360//GO:0006139//GO:0009987//GO:0008150//GO:0071704//GO:0006725//GO:0044260//GO:0008152//GO:0032196	heterocycle metabolic process//primary metabolic process//nucleic acid metabolic process//nitrogen compound metabolic process//DNA recombination//cellular nitrogen compound metabolic process//DNA metabolic process//macromolecule metabolic process//transposition, DNA-mediated//cellular metabolic process//organic cyclic compound metabolic process//nucleobase-containing compound metabolic process//c…	--	--	GO:0003677//GO:0005488//GO:0097159//GO:0003676//GO:1901363//GO:0003824//GO:0016788//GO:0004803//GO:0003674//GO:0016787	DNA binding//binding//organic cyclic compound binding//nucleic acid binding//heterocyclic compound binding//catalytic activity//hydrolase activity, acting on ester bonds//transposase activity//molecular_function//hydrolase activity	no KO assigned | (RefSeq) uncharacterized LOC102583785	http://www.genome.jp/dbget-bin/www_bget?sot:102583785	--	PREDICTED: uncharacterized protein LOC101252695 isoform X1 [Solanum lycopersicum]>gi|723707254|ref|XP_010322370.1| PREDICTED: uncharacterized protein LOC101252695 isoform X1 [Solanum lycopersicum]
278	Novel03456	99.1923	9.45412	3.3912	2.5536e-09	3.963e-08	UP	--	--	--	--	--	--	--	--	--	Ulp1 protease family, C-terminal catalytic domain containing protein [Solanum demissum]
279	Novel03478	238.364	31.1923	2.9339	3.2497e-05	0.00020124	UP	GO:0008150//GO:0008152	biological_process//metabolic process	GO:0005575//GO:0016020	cellular_component//membrane	GO:0003824//GO:0003674	catalytic activity//molecular_function	K01897 long-chain acyl-CoA synthetase [EC:6.2.1.3] | (RefSeq) long chain acyl-CoA synthetase 6, peroxisomal-like	http://www.genome.jp/dbget-bin/www_bget?sot:102590588	--	PREDICTED: long chain acyl-CoA synthetase 6, peroxisomal-like [Solanum tuberosum]
280	Novel03490	25.0418	1.91651	3.7078	0.0016604	0.0063557	UP	GO:0006950//GO:0009611//GO:0050896//GO:0008150	response to stress//response to wounding//response to stimulus//biological_process	--	--	GO:0004857//GO:0098772//GO:0030414//GO:0061135//GO:0003674//GO:0061134//GO:0004866//GO:0030234//GO:0004867	enzyme inhibitor activity//molecular function regulator//peptidase inhibitor activity//endopeptidase regulator activity//molecular_function//peptidase regulator activity//endopeptidase inhibitor activity//enzyme regulator activity//serine-type endopeptidase inhibitor activity	no KO assigned | (RefSeq) proteinase inhibitor I-B-like	http://www.genome.jp/dbget-bin/www_bget?sot:102605208	--	PREDICTED: proteinase inhibitor I-B-like [Solanum tuberosum]
281	Novel03494	437.373	201.117	1.1208	0.00011659	0.00062409	UP	GO:0055114//GO:0008150//GO:0008152	oxidation-reduction process//biological_process//metabolic process	--	--	GO:0016491//GO:0003824//GO:0003674	oxidoreductase activity//catalytic activity//molecular_function	no KO assigned | (RefSeq) 1-aminocyclopropane-1-carboxylate oxidase homolog	http://www.genome.jp/dbget-bin/www_bget?sot:102597238	--	PREDICTED: 1-aminocyclopropane-1-carboxylate oxidase homolog [Solanum tuberosum]
282	Novel03496	560.165	224.769	1.3174	0.00036271	0.0017036	UP	GO:0008213//GO:0006139//GO:1901360//GO:0044403//GO:0032259//GO:0006479//GO:0044237//GO:0006464//GO:0043414//GO:0051704//GO:0044255//GO:0006399//GO:0043170//GO:0009877//GO:0006629//GO:0034641//GO:0016070//GO:0044419//GO:0044267//GO:0019752//GO:0006807//GO:0034470//GO:0019538//GO:0009058//GO:0010467//GO:0090304//GO:0043436//GO:0044238//GO:0046483//GO:0036211//GO:0031365//GO:0032787//GO:0009311//GO:…	protein alkylation//nucleobase-containing compound metabolic process//organic cyclic compound metabolic process//symbiont process//methylation//protein methylation//cellular metabolic process//cellular protein modification process//macromolecule methylation//multi-organism process//cellular lipid metabolic process//tRNA metabolic process//macromolecule metabolic process//nodulation//lipid metabol…	--	--	GO:0051287//GO:0016278//GO:0004497//GO:0042054//GO:0050661//GO:0005488//GO:0004499//GO:0043168//GO:0048037//GO:0016616//GO:0008276//GO:1901265//GO:0016614//GO:0071949//GO:0016705//GO:0000166//GO:0008757//GO:0051998//GO:0010340//GO:0008677//GO:0016709//GO:0016741//GO:0008168//GO:0003674//GO:0016279//GO:0036094//GO:0008171//GO:0043167//GO:0008170//GO:0016740//GO:0016491//GO:0018024//GO:0003857//GO:…	NAD binding//lysine N-methyltransferase activity//monooxygenase activity//histone methyltransferase activity//NADP binding//binding//N,N-dimethylaniline monooxygenase activity//anion binding//cofactor binding//oxidoreductase activity, acting on the CH-OH group of donors, NAD or NADP as acceptor//protein methyltransferase activity//nucleoside phosphate binding//oxidoreductase activity, acting on C…	K00574 cyclopropane-fatty-acyl-phospholipid synthase [EC:2.1.1.79] | (RefSeq) uncharacterized LOC102604983	http://www.genome.jp/dbget-bin/www_bget?sot:102604983	--	PREDICTED: uncharacterized protein LOC102604983 [Solanum tuberosum]
283	Novel03497	39.1434	1.08308	5.1756	4.3048e-07	4.1793e-06	UP	--	--	--	--	--	--	--	--	--	PREDICTED: uncharacterized protein PB18E9.04c-like [Solanum lycopersicum]
284	Novel03499	801.338	385.106	1.0572	0.0016956	0.006471	UP	--	--	--	--	--	--	--	--	--	hypothetical protein M569_00260, partial [Genlisea aurea]
285	Novel03500	262.482	37.1738	2.8199	6.4212e-14	2.1912e-12	UP	GO:0033554//GO:0009987//GO:0006281//GO:0008150//GO:0044260//GO:0006725//GO:0071704//GO:0008152//GO:0006807//GO:0006310//GO:0090304//GO:0044238//GO:0046483//GO:0006259//GO:0034641//GO:0050896//GO:0043170//GO:0006139//GO:1901360//GO:0006950//GO:0006974//GO:0051716//GO:0044237	cellular response to stress//cellular process//DNA repair//biological_process//cellular macromolecule metabolic process//cellular aromatic compound metabolic process//organic substance metabolic process//metabolic process//nitrogen compound metabolic process//DNA recombination//nucleic acid metabolic process//primary metabolic process//heterocycle metabolic process//DNA metabolic process//cellula…	--	--	GO:0098519//GO:0097159//GO:0016462//GO:0004386//GO:0009378//GO:0016788//GO:0019001//GO:0016740//GO:0003824//GO:0030554//GO:0003676//GO:1901363//GO:0003674//GO:0016818//GO:0036094//GO:0016791//GO:0043167//GO:0016787//GO:0032550//GO:0043531//GO:0035639//GO:0032555//GO:0032553//GO:0005524//GO:0016301//GO:0017111//GO:0003678//GO:0032561//GO:0001882//GO:0016772//GO:0005525//GO:0042578//GO:0001883//GO:…	nucleotide phosphatase activity, acting on free nucleotides//organic cyclic compound binding//pyrophosphatase activity//helicase activity//four-way junction helicase activity//hydrolase activity, acting on ester bonds//guanyl nucleotide binding//transferase activity//catalytic activity//adenyl nucleotide binding//nucleic acid binding//heterocyclic compound binding//molecular_function//hydrolase a…	K11269 chromosome transmission fidelity protein 18 | (RefSeq) chromosome transmission fidelity protein 18 homolog	http://www.genome.jp/dbget-bin/www_bget?sot:102583470	--	PREDICTED: chromosome transmission fidelity protein 18 homolog isoform X1 [Solanum tuberosum]
286	Novel03535	188.664	67.6094	1.4805	0.0035556	0.012223	UP	--	--	--	--	GO:0003674//GO:0005488//GO:0005515	molecular_function//binding//protein binding	no KO assigned | (RefSeq) protein CIA1-like	http://www.genome.jp/dbget-bin/www_bget?sot:102594719	--	PREDICTED: probable cytosolic iron-sulfur protein assembly protein Ciao1-like [Solanum tuberosum]
287	Novel03566	287.239	80.6534	1.8324	8.6123e-08	9.7254e-07	UP	--	--	--	--	--	--	--	--	--	--
288	Novel03567	221.624	105.221	1.0747	0.0017922	0.0067911	UP	GO:0008150//GO:0016567//GO:0043412//GO:0009987//GO:0032446//GO:0006508//GO:0008152//GO:0044260//GO:0071704//GO:0070647//GO:0044267//GO:0019538//GO:0036211//GO:0044238//GO:0044237//GO:0006464//GO:0043170	biological_process//protein ubiquitination//macromolecule modification//cellular process//protein modification by small protein conjugation//proteolysis//metabolic process//cellular macromolecule metabolic process//organic substance metabolic process//protein modification by small protein conjugation or removal//cellular protein metabolic process//protein metabolic process//protein modification p…	--	--	GO:0016740//GO:0017171//GO:0003824//GO:0070011//GO:0004175//GO:0016787//GO:0004252//GO:0003674//GO:0008236//GO:0004842//GO:0005515//GO:0005488//GO:0019787//GO:0008233	transferase activity//serine hydrolase activity//catalytic activity//peptidase activity, acting on L-amino acid peptides//endopeptidase activity//hydrolase activity//serine-type endopeptidase activity//molecular_function//serine-type peptidase activity//ubiquitin-protein transferase activity//protein binding//binding//ubiquitin-like protein transferase activity//peptidase activity	K09561 STIP1 homology and U-box containing protein 1 [EC:2.3.2.27] | (RefSeq) E3 ubiquitin-protein ligase CHIP	http://www.genome.jp/dbget-bin/www_bget?sot:102589792	--	PREDICTED: E3 ubiquitin-protein ligase CHIP-like isoform X1 [Nicotiana tomentosiformis]>gi|697127049|ref|XP_009617555.1| PREDICTED: E3 ubiquitin-protein ligase CHIP-like isoform X1 [Nicotiana tomentosiformis]
289	Novel03601	669.759	264.539	1.3402	8.1085e-07	7.4367e-06	UP	GO:0008152//GO:0006793//GO:0071704//GO:0044260//GO:0043412//GO:0008150//GO:0009987//GO:0006796//GO:0044237//GO:0043170//GO:0016310//GO:0006464//GO:0044267//GO:0044238//GO:0006468//GO:0036211//GO:0019538	metabolic process//phosphorus metabolic process//organic substance metabolic process//cellular macromolecule metabolic process//macromolecule modification//biological_process//cellular process//phosphate-containing compound metabolic process//cellular metabolic process//macromolecule metabolic process//phosphorylation//cellular protein modification process//cellular protein metabolic process//pri…	--	--	GO:0016301//GO:0032553//GO:0005524//GO:0035639//GO:0032555//GO:0032550//GO:0043167//GO:0003674//GO:0036094//GO:1901363//GO:0030554//GO:0003824//GO:0016740//GO:0097159//GO:0043168//GO:0005488//GO:0032559//GO:0032549//GO:0097367//GO:1901265//GO:0017076//GO:0000166//GO:0001883//GO:0004672//GO:0001882//GO:0016772//GO:0016773	kinase activity//ribonucleotide binding//ATP binding//purine ribonucleoside triphosphate binding//purine ribonucleotide binding//purine ribonucleoside binding//ion binding//molecular_function//small molecule binding//heterocyclic compound binding//adenyl nucleotide binding//catalytic activity//transferase activity//organic cyclic compound binding//anion binding//binding//adenyl ribonucleotide bin…	no KO assigned | (RefSeq) uncharacterized LOC102600492	http://www.genome.jp/dbget-bin/www_bget?sot:102600492	--	PREDICTED: uncharacterized protein LOC102600492 [Solanum tuberosum]
290	Novel03618	25.5349	4.21208	2.5999	0.0079577	0.024346	UP	GO:0071704//GO:0071669//GO:0042546//GO:0005975//GO:0008152//GO:0009987//GO:0009664//GO:0040007//GO:0070726//GO:0008150//GO:0010215//GO:0016049//GO:0043062//GO:0071668//GO:0016043//GO:0071554//GO:0030198//GO:0044238//GO:0009058//GO:0071555//GO:0022607//GO:0009832//GO:0071840//GO:0045229//GO:0044085	organic substance metabolic process//plant-type cell wall organization or biogenesis//cell wall biogenesis//carbohydrate metabolic process//metabolic process//cellular process//plant-type cell wall organization//growth//cell wall assembly//biological_process//cellulose microfibril organization//cell growth//extracellular structure organization//plant-type cell wall assembly//cellular component or…	GO:0016020//GO:0005575//GO:0044425//GO:0031225//GO:0031224	membrane//cellular_component//membrane part//anchored component of membrane//intrinsic component of membrane	GO:0003674//GO:0004553//GO:0016787//GO:0003824//GO:0016740//GO:0030246//GO:0016798//GO:0005488	molecular_function//hydrolase activity, hydrolyzing O-glycosyl compounds//hydrolase activity//catalytic activity//transferase activity//carbohydrate binding//hydrolase activity, acting on glycosyl bonds//binding	no KO assigned | (RefSeq) COBRA-like protein 7	http://www.genome.jp/dbget-bin/www_bget?sot:102583248	--	PREDICTED: COBRA-like protein 7-like [Solanum tuberosum]
291	Novel03630	79.6093	10.714	2.8934	1.0659e-06	9.5168e-06	UP	--	--	--	--	--	--	no KO assigned | (RefSeq) uncharacterized LOC102602995	http://www.genome.jp/dbget-bin/www_bget?sot:102602995	--	PREDICTED: uncharacterized protein LOC102602995 [Solanum tuberosum]
292	PGSC0003DMG400000001	11495.2	3267.2	1.8149	6.8743e-15	2.732e-13	UP	GO:0008150//GO:0051179//GO:0009987//GO:0006810//GO:0051234//GO:0055085	biological_process//localization//cellular process//transport//establishment of localization//transmembrane transport	GO:0016021//GO:0005575//GO:0031224//GO:0044425//GO:0016020	integral component of membrane//cellular_component//intrinsic component of membrane//membrane part//membrane	--	--	K15277 solute carrier family 35 (adenosine 3'-phospho 5'-phosphosulfate transporter), member B3 | (RefSeq) UDP-galactose/UDP-glucose transporter 4-like	http://www.genome.jp/dbget-bin/www_bget?sot:102596365	UTR2	UAA transporter
293	PGSC0003DMG400000045	126.979	9.95107	3.6736	4.4897e-12	1.1683e-10	UP	GO:0008150//GO:0006810//GO:0051234//GO:0051179	biological_process//transport//establishment of localization//localization	GO:0044425//GO:0031224//GO:0016020//GO:0016021//GO:0005575	membrane part//intrinsic component of membrane//membrane//integral component of membrane//cellular_component	GO:0005215//GO:0003674	transporter activity//molecular_function	K09872 aquaporin PIP | (RefSeq) probable aquaporin PIP1-5	http://www.genome.jp/dbget-bin/www_bget?sot:102598096	-	Major intrinsic protein, conserved site||Aquaporin transporter||Aquaporin-like||Major intrinsic protein
294	PGSC0003DMG400000050	128.86	47.6974	1.4338	0.00059163	0.002595	UP	--	--	--	--	--	--	K12604 CCR4-NOT transcription complex subunit 1 | (RefSeq) CCR4-NOT transcription complex subunit 1-like	http://www.genome.jp/dbget-bin/www_bget?sot:102589155	-	CCR4-NOT transcription complex subunit 1, TTP binding domain
295	PGSC0003DMG400000067	5252.14	1457.9	1.849	1.0844e-13	3.6131e-12	UP	GO:0050896//GO:0001101//GO:0006950//GO:0009414//GO:0042221//GO:0009628//GO:0008150//GO:0010035//GO:1901700//GO:0009269//GO:0009415	response to stimulus//response to acid chemical//response to stress//response to water deprivation//response to chemical//response to abiotic stimulus//biological_process//response to inorganic substance//response to oxygen-containing compound//response to desiccation//response to water	--	--	--	--	no KO assigned | (RefSeq) desiccation protectant protein Lea14 homolog	http://www.genome.jp/dbget-bin/www_bget?sot:102586655	-	Water stress and hypersensitive response domain||Immunoglobulin-like fold||Late embryogenesis abundant protein, LEA-14
296	PGSC0003DMG400000121	38.8319	6.73522	2.5274	0.0015157	0.0058727	UP	GO:0008150//GO:0046942//GO:0006810//GO:0051234//GO:0015711//GO:0015740//GO:0015743//GO:0071702//GO:0006811//GO:0051179//GO:0015849//GO:0006835//GO:0006820	biological_process//carboxylic acid transport//transport//establishment of localization//organic anion transport//C4-dicarboxylate transport//malate transport//organic substance transport//ion transport//localization//organic acid transport//dicarboxylic acid transport//anion transport	GO:0044425//GO:0016021//GO:0005575//GO:0031224//GO:0016020	membrane part//integral component of membrane//cellular_component//intrinsic component of membrane//membrane	--	--	--	--	-	Aluminum-activated malate transporter
297	PGSC0003DMG400000133	1045.27	359.832	1.5385	3.668e-09	5.5277e-08	UP	--	--	--	--	GO:0003674//GO:0003824	molecular_function//catalytic activity	K01115 phospholipase D1/2 [EC:3.1.4.4] | (RefSeq) phospholipase D gamma 1-like	http://www.genome.jp/dbget-bin/www_bget?sot:102599532	-	Phospholipase D family||Phospholipase D, C-terminal||Phospholipase D/Transphosphatidylase
298	PGSC0003DMG400000136	1018.53	383.545	1.409	4.4522e-06	3.3961e-05	UP	GO:0016070//GO:1903506//GO:1901360//GO:0034641//GO:0006139//GO:0006366//GO:0009889//GO:0050789//GO:1902680//GO:0044271//GO:0044249//GO:0031323//GO:0008150//GO:0031326//GO:0006355//GO:0032774//GO:2000112//GO:0010468//GO:0065007//GO:0006357//GO:0048522//GO:0044237//GO:0051173//GO:0050794//GO:0018130//GO:0060255//GO:0051252//GO:0010556//GO:0019438//GO:0034654//GO:0009891//GO:0045935//GO:0031325//GO:…	RNA metabolic process//regulation of nucleic acid-templated transcription//organic cyclic compound metabolic process//cellular nitrogen compound metabolic process//nucleobase-containing compound metabolic process//transcription by RNA polymerase II//regulation of biosynthetic process//regulation of biological process//positive regulation of RNA biosynthetic process//cellular nitrogen compound bio…	GO:0044424//GO:0005623//GO:0043229//GO:0005575//GO:0005622//GO:0043231//GO:0005634//GO:0044464//GO:0043226//GO:0043227	intracellular part//cell//intracellular organelle//cellular_component//intracellular//intracellular membrane-bounded organelle//nucleus//cell part//organelle//membrane-bounded organelle	GO:0046983//GO:0043565//GO:0005488//GO:0000977//GO:0003677//GO:0003676//GO:0000976//GO:1901363//GO:0005515//GO:0003674//GO:0001067//GO:0044212//GO:0003700//GO:0001012//GO:0097159	protein dimerization activity//sequence-specific DNA binding//binding//RNA polymerase II regulatory region sequence-specific DNA binding//DNA binding//nucleic acid binding//transcription regulatory region sequence-specific DNA binding//heterocyclic compound binding//protein binding//molecular_function//regulatory region nucleic acid binding//transcription regulatory region DNA binding//DNA-bindin…	K09264 MADS-box transcription factor, plant | (RefSeq) MADS-box transcription factor 6	http://www.genome.jp/dbget-bin/www_bget?sot:102602212	-	Transcription factor, MADS-box||Transcription factor, K-box||MADS MEF2-like
299	PGSC0003DMG400000150	67.7938	12.9976	2.3829	7.5966e-05	0.00042795	UP	--	--	--	--	--	--	no KO assigned | (RefSeq) uncharacterized LOC102601572	http://www.genome.jp/dbget-bin/www_bget?sot:102601572	--	--
300	PGSC0003DMG400000153	4496.16	2046.54	1.1355	8.4987e-07	7.7634e-06	UP	GO:0006813//GO:0051179//GO:0006811//GO:0030001//GO:0006810//GO:0006812//GO:0051234//GO:0008150//GO:0015672	potassium ion transport//localization//ion transport//metal ion transport//transport//cation transport//establishment of localization//biological_process//monovalent inorganic cation transport	--	--	--	--	no KO assigned | (RefSeq) K(+) efflux antiporter 2, chloroplastic	http://www.genome.jp/dbget-bin/www_bget?sot:102583128	-	NAD(P)-binding domain||Regulator of K+ conductance, N-terminal
301	PGSC0003DMG400000158	181.238	68.2338	1.4093	0.00021656	0.0010829	UP	GO:0071840//GO:0006996//GO:0007015//GO:0007010//GO:0008154//GO:0009987//GO:0016043//GO:0030042//GO:0030036//GO:0030029//GO:0008150//GO:0032984//GO:0043624//GO:0051261//GO:0043933//GO:0022411	cellular component organization or biogenesis//organelle organization//actin filament organization//cytoskeleton organization//actin polymerization or depolymerization//cellular process//cellular component organization//actin filament depolymerization//actin cytoskeleton organization//actin filament-based process//biological_process//protein-containing complex disassembly//cellular protein comple…	GO:0043229//GO:0005575//GO:0005622//GO:0043226//GO:0044464//GO:0043232//GO:0015629//GO:0005856//GO:0043228//GO:0044424//GO:0005623	intracellular organelle//cellular_component//intracellular//organelle//cell part//intracellular non-membrane-bounded organelle//actin cytoskeleton//cytoskeleton//non-membrane-bounded organelle//intracellular part//cell	GO:0005515//GO:0003674//GO:0005488//GO:0003779//GO:0008092	protein binding//molecular_function//binding//actin binding//cytoskeletal protein binding	K05765 cofilin | (RefSeq) actin-depolymerizing factor 12	http://www.genome.jp/dbget-bin/www_bget?sot:102586653	-	Actin-depolymerising factor homology domain||ADF-H/Gelsolin-like domain||ADF/Cofilin
302	PGSC0003DMG400000160	219.958	92.211	1.2542	0.00032854	0.0015631	UP	--	--	GO:0016021//GO:0005575//GO:0016020//GO:0031224//GO:0044425	integral component of membrane//cellular_component//membrane//intrinsic component of membrane//membrane part	--	--	--	--	--	--
303	PGSC0003DMG400000174	175.593	19.3276	3.1835	6.4376e-13	1.9423e-11	UP	GO:0008152//GO:0009744//GO:0044237//GO:0050896//GO:0008150//GO:0042221//GO:0006259//GO:0044249//GO:1901360//GO:0034641//GO:0006139//GO:0006725//GO:0090304//GO:0010033//GO:0044238//GO:0046483//GO:0071704//GO:0034645//GO:0009987//GO:0043170//GO:1901700//GO:0009058//GO:0009059//GO:0006807//GO:0009743//GO:0006260//GO:0044260//GO:0034285//GO:1901576	metabolic process//response to sucrose//cellular metabolic process//response to stimulus//biological_process//response to chemical//DNA metabolic process//cellular biosynthetic process//organic cyclic compound metabolic process//cellular nitrogen compound metabolic process//nucleobase-containing compound metabolic process//cellular aromatic compound metabolic process//nucleic acid metabolic proce…	GO:0005623//GO:0044424//GO:0043228//GO:0043232//GO:0044427//GO:0043227//GO:0043226//GO:0032991//GO:0044464//GO:0005694//GO:0043231//GO:0000808//GO:0005634//GO:0005575//GO:0005622//GO:0044446//GO:0043229//GO:0044422	cell//intracellular part//non-membrane-bounded organelle//intracellular non-membrane-bounded organelle//chromosomal part//membrane-bounded organelle//organelle//protein-containing complex//cell part//chromosome//intracellular membrane-bounded organelle//origin recognition complex//nucleus//cellular_component//intracellular//intracellular organelle part//intracellular organelle//organelle part	--	--	K02607 origin recognition complex subunit 5 | (RefSeq) origin of replication complex subunit 5	http://www.genome.jp/dbget-bin/www_bget?sot:102599857	ORC5	P-loop containing nucleoside triphosphate hydrolase||Origin recognition complex, subunit 5
304	PGSC0003DMG400000194	42.701	12.906	1.7262	0.013152	0.037378	UP	--	--	--	--	--	--	K11985 TRAF-interacting protein [EC:2.3.2.27] | (RefSeq) uncharacterized LOC102584672	http://www.genome.jp/dbget-bin/www_bget?sot:102584672	-	Zinc finger, RING/FYVE/PHD-type||Zinc finger, RING-type
305	PGSC0003DMG400000196	178.936	22.26	3.0069	4.6342e-12	1.2026e-10	UP	--	--	--	--	--	--	--	--	--	--
306	PGSC0003DMG400000210	839.501	383.708	1.1295	2.2106e-05	0.00014214	UP	GO:0055085//GO:0008150//GO:0051234//GO:0006810//GO:0051179//GO:0009987	transmembrane transport//biological_process//establishment of localization//transport//localization//cellular process	GO:0044425//GO:0016021//GO:0005575//GO:0016020//GO:0031224	membrane part//integral component of membrane//cellular_component//membrane//intrinsic component of membrane	--	--	K14684 solute carrier family 25 (mitochondrial phosphate transporter), member 23/24/25/41 | (RefSeq) mitochondrial carrier-like protein	http://www.genome.jp/dbget-bin/www_bget?sot:102577527	-	Mitochondrial carrier protein||Mitochondrial substrate/solute carrier||Mitochondrial carrier domain
307	PGSC0003DMG400000233	8768.75	3927.09	1.1589	5.0537e-07	4.8336e-06	UP	GO:0010033//GO:0009725//GO:0009719//GO:0009735//GO:0050896//GO:0042221//GO:0008150	response to organic substance//response to hormone//response to endogenous stimulus//response to cytokinin//response to stimulus//response to chemical//biological_process	GO:0005739//GO:0016020//GO:0043227//GO:0043229//GO:0016021//GO:0043231//GO:0005575//GO:0044424//GO:0044425//GO:0005737//GO:0043226//GO:0044464//GO:0031224//GO:0005622//GO:0044444//GO:0005623	mitochondrion//membrane//membrane-bounded organelle//intracellular organelle//integral component of membrane//intracellular membrane-bounded organelle//cellular_component//intracellular part//membrane part//cytoplasm//organelle//cell part//intrinsic component of membrane//intracellular//cytoplasmic part//cell	--	--	no KO assigned | (RefSeq) fiber protein Fb11	http://www.genome.jp/dbget-bin/www_bget?sot:102587205	--	--
308	PGSC0003DMG400000235	2178.91	943.958	1.2068	5.2453e-07	4.9992e-06	UP	--	--	--	--	--	--	no KO assigned | (RefSeq) uncharacterized LOC102588082	http://www.genome.jp/dbget-bin/www_bget?sot:102588082	-	WD40-repeat-containing domain||WD40 repeat||WD40/YVTN repeat-like-containing domain
309	PGSC0003DMG400000240	93.1487	22.5819	2.0444	6.9597e-05	0.00039575	UP	--	--	--	--	--	--	no KO assigned | (RefSeq) pentatricopeptide repeat-containing protein At5g08510	http://www.genome.jp/dbget-bin/www_bget?sot:102592727	-	Tetratricopeptide-like helical domain||Pentatricopeptide repeat
310	PGSC0003DMG400000304	108.281	11.7953	3.1985	0.0047712	0.015702	UP	GO:0007165//GO:0009987//GO:0035556//GO:0050794//GO:0050896//GO:0023052//GO:0065007//GO:0008150//GO:0050789//GO:0007154//GO:0007264//GO:0051716	signal transduction//cellular process//intracellular signal transduction//regulation of cellular process//response to stimulus//signaling//biological regulation//biological_process//regulation of biological process//cell communication//small GTPase mediated signal transduction//cellular response to stimulus	GO:0044464//GO:0005622//GO:0005623//GO:0016020//GO:0005575	cell part//intracellular//cell//membrane//cellular_component	GO:0097159//GO:0016462//GO:0032561//GO:0017111//GO:0001883//GO:0005525//GO:0003824//GO:1901363//GO:0000166//GO:0019001//GO:0001882//GO:0043167//GO:1901265//GO:0097367//GO:0016818//GO:0036094//GO:0003674//GO:0017076//GO:0043168//GO:0032553//GO:0003924//GO:0016787//GO:0032550//GO:0016817//GO:0032549//GO:0005488//GO:0032555//GO:0035639	organic cyclic compound binding//pyrophosphatase activity//guanyl ribonucleotide binding//nucleoside-triphosphatase activity//purine nucleoside binding//GTP binding//catalytic activity//heterocyclic compound binding//nucleotide binding//guanyl nucleotide binding//nucleoside binding//ion binding//nucleoside phosphate binding//carbohydrate derivative binding//hydrolase activity, acting on acid anhy…	K04392 Ras-related C3 botulinum toxin substrate 1 | (RefSeq) rac-like GTP-binding protein ARAC7	http://www.genome.jp/dbget-bin/www_bget?sot:102597002	-	Small GTP-binding protein domain||Small GTPase superfamily||Small GTPase superfamily, Rho type||P-loop containing nucleoside triphosphate hydrolase
311	PGSC0003DMG400000357	90.9394	17.7795	2.3547	8.2218e-06	5.8604e-05	UP	--	--	--	--	--	--	no KO assigned | (RefSeq) protein IQ-DOMAIN 14-like	http://www.genome.jp/dbget-bin/www_bget?sot:102603748	-	IQ motif, EF-hand binding site||Domain of unknown function DUF4005
312	PGSC0003DMG400000359	2694.26	972.967	1.4694	1.1818e-09	1.9689e-08	UP	--	--	--	--	GO:1901363//GO:0020037//GO:0046914//GO:0043169//GO:0097159//GO:0005488//GO:0008270//GO:0046906//GO:0003674//GO:0046872//GO:0043167	heterocyclic compound binding//heme binding//transition metal ion binding//cation binding//organic cyclic compound binding//binding//zinc ion binding//tetrapyrrole binding//molecular_function//metal ion binding//ion binding	no KO assigned | (RefSeq) cytochrome B5-like protein	http://www.genome.jp/dbget-bin/www_bget?sot:102604534	-	Cytochrome b5-like heme/steroid binding domain||Cytochrome b5, heme-binding site||Zinc finger, RING-type||Zinc finger, RING/FYVE/PHD-type||Zinc finger, RING-CH-type
313	PGSC0003DMG400000366	363.987	135.548	1.4251	5.5147e-06	4.0997e-05	UP	--	--	GO:0031224//GO:0016020//GO:0005575//GO:0016021//GO:0044425	intrinsic component of membrane//membrane//cellular_component//integral component of membrane//membrane part	--	--	no KO assigned | (RefSeq) probable glycosyltransferase At3g07620	http://www.genome.jp/dbget-bin/www_bget?sot:102601062	-	Exostosin-like
314	PGSC0003DMG400000405	2786.24	822.024	1.7611	3.9751e-13	1.2306e-11	UP	GO:0009987//GO:0006325//GO:0031497//GO:0016043//GO:0006996//GO:0071840//GO:0022607//GO:0034728//GO:0043933//GO:0044085//GO:0008150//GO:0071103//GO:0065003//GO:0071824//GO:0070271//GO:0065004//GO:0034622//GO:0006334//GO:0051276//GO:0006323//GO:0006333	cellular process//chromatin organization//chromatin assembly//cellular component organization//organelle organization//cellular component organization or biogenesis//cellular component assembly//nucleosome organization//protein-containing complex subunit organization//cellular component biogenesis//biological_process//DNA conformation change//protein-containing complex assembly//protein-DNA compl…	GO:0000785//GO:0044464//GO:0032993//GO:0043226//GO:0005622//GO:0005634//GO:0005623//GO:0044427//GO:0043228//GO:0005694//GO:0032991//GO:0043227//GO:0044422//GO:0043229//GO:0044446//GO:0044815//GO:0000786//GO:0005575//GO:0043231//GO:0044424//GO:0043232	chromatin//cell part//protein-DNA complex//organelle//intracellular//nucleus//cell//chromosomal part//non-membrane-bounded organelle//chromosome//protein-containing complex//membrane-bounded organelle//organelle part//intracellular organelle//intracellular organelle part//DNA packaging complex//nucleosome//cellular_component//intracellular membrane-bounded organelle//intracellular part//intracell…	GO:0097159//GO:0005515//GO:0003676//GO:0003677//GO:1901363//GO:0046983//GO:0003674//GO:0046982//GO:0005488	organic cyclic compound binding//protein binding//nucleic acid binding//DNA binding//heterocyclic compound binding//protein dimerization activity//molecular_function//protein heterodimerization activity//binding	K11254 histone H4 | (RefSeq) histone H4	http://www.genome.jp/dbget-bin/www_bget?sot:102597419	-	CENP-T/Histone H4, histone fold||Histone H4||Histone H4, conserved site||Histone-fold
315	PGSC0003DMG400000408	740.903	19.7737	5.2276	1.7241e-08	2.2658e-07	UP	GO:0044036//GO:0044237//GO:0044264//GO:0008152//GO:0044260//GO:0042546//GO:0005975//GO:0071704//GO:0043170//GO:0044262//GO:0010411//GO:0044042//GO:0008150//GO:0044085//GO:0045229//GO:0010383//GO:0071840//GO:0071555//GO:0044238//GO:0006073//GO:0009987//GO:0071554//GO:0005976//GO:0010410//GO:0016043	cell wall macromolecule metabolic process//cellular metabolic process//cellular polysaccharide metabolic process//metabolic process//cellular macromolecule metabolic process//cell wall biogenesis//carbohydrate metabolic process//organic substance metabolic process//macromolecule metabolic process//cellular carbohydrate metabolic process//xyloglucan metabolic process//glucan metabolic process//bio…	GO:0071944//GO:0005575//GO:0048046//GO:0030312//GO:0005618//GO:0005623//GO:0005576//GO:0044464	cell periphery//cellular_component//apoplast//external encapsulating structure//cell wall//cell//extracellular region//cell part	GO:0016787//GO:0016798//GO:0004553//GO:0016757//GO:0003674//GO:0016758//GO:0016740//GO:0003824//GO:0016762	hydrolase activity//hydrolase activity, acting on glycosyl bonds//hydrolase activity, hydrolyzing O-glycosyl compounds//transferase activity, transferring glycosyl groups//molecular_function//transferase activity, transferring hexosyl groups//transferase activity//catalytic activity//xyloglucan:xyloglucosyl transferase activity	K08235 xyloglucan:xyloglucosyl transferase [EC:2.4.1.207] | (RefSeq) xyloglucan endotransglucosylase/hydrolase protein 31-like	http://www.genome.jp/dbget-bin/www_bget?sot:102599489	-	Xyloglucan endotransglucosylase/hydrolase||Xyloglucan endo-transglycosylase, C-terminal||Concanavalin A-like lectin/glucanase domain||Glycoside hydrolase family 16
316	PGSC0003DMG400000414	131.006	64.4637	1.0231	0.010673	0.031235	UP	GO:0051321//GO:0007059//GO:1903046//GO:0022402//GO:0071840//GO:0006996//GO:0016043//GO:0007049//GO:0098813//GO:0009987//GO:0000003//GO:0008150//GO:0045132//GO:0000280//GO:0048285	meiotic cell cycle//chromosome segregation//meiotic cell cycle process//cell cycle process//cellular component organization or biogenesis//organelle organization//cellular component organization//cell cycle//nuclear chromosome segregation//cellular process//reproduction//biological_process//meiotic chromosome segregation//nuclear division//organelle fission	GO:0043231//GO:0005575//GO:0043229//GO:0044446//GO:0044422//GO:0043227//GO:0005694//GO:0043232//GO:0044424//GO:0005634//GO:0000775//GO:0005622//GO:0043226//GO:0044464//GO:0043228//GO:0044427//GO:0005623//GO:0098687	intracellular membrane-bounded organelle//cellular_component//intracellular organelle//intracellular organelle part//organelle part//membrane-bounded organelle//chromosome//intracellular non-membrane-bounded organelle//intracellular part//nucleus//chromosome, centromeric region//intracellular//organelle//cell part//non-membrane-bounded organelle//chromosomal part//cell//chromosomal region	--	--	no KO assigned | (RefSeq) uncharacterized LOC102603395	http://www.genome.jp/dbget-bin/www_bget?sot:102603395	-	Shugoshin, C-terminal
317	PGSC0003DMG400000415	327.168	76.8462	2.09	4.9567e-08	5.8744e-07	UP	--	--	--	--	--	--	no KO assigned | (RefSeq) uncharacterized LOC102603960	http://www.genome.jp/dbget-bin/www_bget?sot:102603960	-	Protein of unknown function DUF1635
318	PGSC0003DMG400000432	102.952	44.8014	1.2004	0.0090964	0.027284	UP	GO:0008150//GO:0008152	biological_process//metabolic process	--	--	GO:0003824//GO:0016740//GO:0016758//GO:0003674//GO:0016757	catalytic activity//transferase activity//transferase activity, transferring hexosyl groups//molecular_function//transferase activity, transferring glycosyl groups	K13495 cis-zeatin O-glucosyltransferase [EC:2.4.1.215] | (RefSeq) zeatin O-glucosyltransferase-like	http://www.genome.jp/dbget-bin/www_bget?sot:102585941	-	UDP-glycosyltransferase family, conserved site||UDP-glucuronosyl/UDP-glucosyltransferase
319	PGSC0003DMG400000441	1567.48	343.957	2.1881	4.7494e-09	6.9561e-08	UP	GO:0010556//GO:0060255//GO:0034654//GO:0019438//GO:0050794//GO:0018130//GO:0010468//GO:2000112//GO:0032774//GO:0065007//GO:0031326//GO:0008150//GO:0006355//GO:0050789//GO:0031323//GO:0044249//GO:0016070//GO:0009889//GO:0034641//GO:1901362//GO:0090304//GO:0080090//GO:0046483//GO:0044238//GO:0051171//GO:0009987//GO:0009058//GO:0006807//GO:0010467//GO:0008152//GO:0051252//GO:0044237//GO:0044271//GO:…	regulation of macromolecule biosynthetic process//regulation of macromolecule metabolic process//nucleobase-containing compound biosynthetic process//aromatic compound biosynthetic process//regulation of cellular process//heterocycle biosynthetic process//regulation of gene expression//regulation of cellular macromolecule biosynthetic process//RNA biosynthetic process//biological regulation//regu…	GO:0005623//GO:0043226//GO:0044464//GO:0005634//GO:0005622//GO:0044424//GO:0043227//GO:0043231//GO:0005575//GO:0043229	cell//organelle//cell part//nucleus//intracellular//intracellular part//membrane-bounded organelle//intracellular membrane-bounded organelle//cellular_component//intracellular organelle	GO:1901363//GO:0003677//GO:0003676//GO:0097159//GO:0005488//GO:0003674	heterocyclic compound binding//DNA binding//nucleic acid binding//organic cyclic compound binding//binding//molecular_function	no KO assigned | (RefSeq) dof zinc finger protein DOF5.1-like	http://www.genome.jp/dbget-bin/www_bget?sot:102592912	-	Zinc finger, Dof-type
320	PGSC0003DMG400000490	1177.48	538.175	1.1296	8.8379e-06	6.2635e-05	UP	--	--	--	--	--	--	K11877 proteasome assembly chaperone 3 | (RefSeq) uncharacterized LOC102580791	http://www.genome.jp/dbget-bin/www_bget?sot:102580791	-	Proteasome assembly chaperone 3
321	PGSC0003DMG400000493	6486.36	414.692	3.9673	0.0074003	0.022862	UP	GO:0015976//GO:0008150	carbon utilization//biological_process	--	--	GO:0003824//GO:0043169//GO:0016836//GO:0046914//GO:0016829//GO:0008270//GO:0005488//GO:0004089//GO:0016835//GO:0043167//GO:0046872//GO:0003674	catalytic activity//cation binding//hydro-lyase activity//transition metal ion binding//lyase activity//zinc ion binding//binding//carbonate dehydratase activity//carbon-oxygen lyase activity//ion binding//metal ion binding//molecular_function	K01673 carbonic anhydrase [EC:4.2.1.1] | (RefSeq) carbonic anhydrase, chloroplastic	http://www.genome.jp/dbget-bin/www_bget?sot:102591490	-	Carbonic anhydrase, prokaryotic-like, conserved site||Carbonic anhydrase
322	PGSC0003DMG400000502	390.81	117.01	1.7398	3.8235e-05	0.00023222	UP	--	--	GO:0031224//GO:0016020//GO:0005575//GO:0016021//GO:0044425	intrinsic component of membrane//membrane//cellular_component//integral component of membrane//membrane part	--	--	no KO assigned | (RefSeq) uncharacterized LOC102585981	http://www.genome.jp/dbget-bin/www_bget?sot:102585981	-	Six-bladed beta-propeller, TolB-like||NHL repeat
323	PGSC0003DMG400000503	195.835	44.5609	2.1358	4.5206e-07	4.3673e-06	UP	--	--	--	--	--	--	no KO assigned | (RefSeq) uncharacterized LOC102590628	http://www.genome.jp/dbget-bin/www_bget?sot:102590628	--	--
324	PGSC0003DMG400000511	324.957	115.924	1.4871	0.00057568	0.0025395	UP	GO:0044237//GO:0008152//GO:0006950//GO:0042744//GO:0009056//GO:0055114//GO:0009987//GO:0044248//GO:0042743//GO:0008150//GO:0072593//GO:0050896//GO:0006979	cellular metabolic process//metabolic process//response to stress//hydrogen peroxide catabolic process//catabolic process//oxidation-reduction process//cellular process//cellular catabolic process//hydrogen peroxide metabolic process//biological_process//reactive oxygen species metabolic process//response to stimulus//response to oxidative stress	GO:0005575//GO:0005576	cellular_component//extracellular region	GO:0003674//GO:0046872//GO:0043167//GO:0005488//GO:0046906//GO:0004601//GO:0016209//GO:0043169//GO:0097159//GO:0016491//GO:1901363//GO:0020037//GO:0016684//GO:0003824	molecular_function//metal ion binding//ion binding//binding//tetrapyrrole binding//peroxidase activity//antioxidant activity//cation binding//organic cyclic compound binding//oxidoreductase activity//heterocyclic compound binding//heme binding//oxidoreductase activity, acting on peroxide as acceptor//catalytic activity	K00430 peroxidase [EC:1.11.1.7] | (RefSeq) peroxidase 63	http://www.genome.jp/dbget-bin/www_bget?sot:102580657	-	Secretory peroxidase||Haem peroxidase, plant/fungal/bacterial||Haem peroxidase||Plant peroxidase||Peroxidase, active site||Peroxidases heam-ligand binding site
325	PGSC0003DMG400000521	591.031	133.073	2.151	1.1895e-05	8.1746e-05	UP	GO:0008150//GO:0006629//GO:0008202//GO:0006694//GO:0009058//GO:0008610//GO:0055114//GO:0044238//GO:1901362//GO:1901360//GO:0008152//GO:1901576//GO:0071704	biological_process//lipid metabolic process//steroid metabolic process//steroid biosynthetic process//biosynthetic process//lipid biosynthetic process//oxidation-reduction process//primary metabolic process//organic cyclic compound biosynthetic process//organic cyclic compound metabolic process//metabolic process//organic substance biosynthetic process//organic substance metabolic process	--	--	GO:0016491//GO:0016229//GO:0033764//GO:0003824//GO:0003854//GO:0016616//GO:0003674//GO:0016614	oxidoreductase activity//steroid dehydrogenase activity//steroid dehydrogenase activity, acting on the CH-OH group of donors, NAD or NADP as acceptor//catalytic activity//3-beta-hydroxy-delta5-steroid dehydrogenase activity//oxidoreductase activity, acting on the CH-OH group of donors, NAD or NADP as acceptor//molecular_function//oxidoreductase activity, acting on CH-OH group of donors	no KO assigned | (RefSeq) tetraketide alpha-pyrone reductase 1	http://www.genome.jp/dbget-bin/www_bget?sot:102593519	-	3-beta hydroxysteroid dehydrogenase/isomerase||NAD(P)-binding domain
326	PGSC0003DMG400000529	544.512	158.955	1.7763	6.7965e-10	1.201e-08	UP	GO:0009653//GO:0009860//GO:0009856//GO:0003006//GO:0048468//GO:0030001//GO:0050801//GO:0065007//GO:0072507//GO:0008150//GO:0051234//GO:0032989//GO:0098662//GO:0006810//GO:0055082//GO:0055065//GO:0015672//GO:0016043//GO:0000902//GO:0006873//GO:0098655//GO:0019725//GO:0009826//GO:0009987//GO:0070838//GO:0030154//GO:0098771//GO:0071840//GO:0071805//GO:0051179//GO:0032502//GO:0040007//GO:0072503//GO:…	anatomical structure morphogenesis//pollen tube growth//pollination//developmental process involved in reproduction//cell development//metal ion transport//ion homeostasis//biological regulation//divalent inorganic cation homeostasis//biological_process//establishment of localization//cellular component morphogenesis//inorganic cation transmembrane transport//transport//cellular chemical homeosta…	GO:0005623//GO:0016324//GO:0098590//GO:0031224//GO:0044464//GO:0098589//GO:0044459//GO:0071944//GO:0044425//GO:0005886//GO:0016020//GO:0098805//GO:0045177//GO:0005575//GO:0016021	cell//apical plasma membrane//plasma membrane region//intrinsic component of membrane//cell part//membrane region//plasma membrane part//cell periphery//membrane part//plasma membrane//membrane//whole membrane//apical part of cell//cellular_component//integral component of membrane	GO:0015075//GO:0008324//GO:0005244//GO:0022890//GO:0022857//GO:0005249//GO:0072509//GO:0022803//GO:0005261//GO:0046873//GO:0005267//GO:0005262//GO:0005215//GO:0022838//GO:0015079//GO:0022832//GO:0015085//GO:0015267//GO:0022843//GO:0005216//GO:0003674//GO:0015077//GO:0022836	ion transmembrane transporter activity//cation transmembrane transporter activity//voltage-gated ion channel activity//inorganic cation transmembrane transporter activity//transmembrane transporter activity//voltage-gated potassium channel activity//divalent inorganic cation transmembrane transporter activity//passive transmembrane transporter activity//cation channel activity//metal ion transmem…	K05391 cyclic nucleotide gated channel, other eukaryote | (RefSeq) putative cyclic nucleotide-gated ion channel 18	http://www.genome.jp/dbget-bin/www_bget?sot:102586859	ATCNGC17	RmlC-like jelly roll fold||Cyclic nucleotide-binding domain||Ion transport domain||Potassium channel, voltage-dependent, EAG/ELK/ERG||Cyclic nucleotide-binding-like
327	PGSC0003DMG400000531	1283.24	419.149	1.6143	2.4005e-08	3.0679e-07	UP	GO:0070647//GO:0043412//GO:0044267//GO:0016567//GO:0008150//GO:0044238//GO:0009987//GO:0036211//GO:0019538//GO:0008152//GO:0044237//GO:0032446//GO:0071704//GO:0043170//GO:0044260//GO:0006464	protein modification by small protein conjugation or removal//macromolecule modification//cellular protein metabolic process//protein ubiquitination//biological_process//primary metabolic process//cellular process//protein modification process//protein metabolic process//metabolic process//cellular metabolic process//protein modification by small protein conjugation//organic substance metabolic p…	--	--	GO:0003824//GO:0016740//GO:0004842//GO:0019787//GO:0003674	catalytic activity//transferase activity//ubiquitin-protein transferase activity//ubiquitin-like protein transferase activity//molecular_function	no KO assigned | (RefSeq) U-box domain-containing protein 40	http://www.genome.jp/dbget-bin/www_bget?sot:102580324	-	Armadillo-type fold||Armadillo||Zinc finger, RING/FYVE/PHD-type||U box domain||Armadillo-like helical
328	PGSC0003DMG400000538	114.316	19.489	2.5523	2.4206e-07	2.4763e-06	UP	--	--	--	--	--	--	K06228 fused [EC:2.7.11.1] | (RefSeq) serine/threonine-protein kinase TIO	http://www.genome.jp/dbget-bin/www_bget?sot:102603505	-	Armadillo-like helical
329	PGSC0003DMG400000540	234.798	45.3835	2.3712	0.0026294	0.0094448	UP	GO:0044260//GO:0051438//GO:0006464//GO:0032268//GO:0031399//GO:0048518//GO:0031398//GO:0071704//GO:0043085//GO:0043170//GO:1903320//GO:0019222//GO:0032446//GO:0031396//GO:0048522//GO:0044237//GO:0050790//GO:0031325//GO:0008152//GO:0009893//GO:0044093//GO:0051340//GO:0019538//GO:0044238//GO:1904666//GO:0051338//GO:0009987//GO:0036211//GO:0032270//GO:0080090//GO:0010604//GO:0065009//GO:1904668//GO:…	cellular macromolecule metabolic process//regulation of ubiquitin-protein transferase activity//cellular protein modification process//regulation of cellular protein metabolic process//regulation of protein modification process//positive regulation of biological process//positive regulation of protein ubiquitination//organic substance metabolic process//positive regulation of catalytic activity//…	--	--	GO:0003674//GO:0055103//GO:0097027//GO:0005488//GO:0098772//GO:0030234//GO:0010997//GO:0005515//GO:0044877//GO:0055106	molecular_function//ligase regulator activity//ubiquitin-protein transferase activator activity//binding//molecular function regulator//enzyme regulator activity//anaphase-promoting complex binding//protein binding//protein-containing complex binding//ubiquitin-protein transferase regulator activity	K03363 cell division cycle 20, cofactor of APC complex | (RefSeq) cell division cycle 20.2, cofactor of APC complex-like	http://www.genome.jp/dbget-bin/www_bget?sot:102602712	-	WD40 repeat, conserved site||WD40/YVTN repeat-like-containing domain||WD40-repeat-containing domain||The WD repeat Cdc20/Fizzy family||Anaphase-promoting complex subunit 4, WD40 domain||WD40 repeat
330	PGSC0003DMG400000546	760.592	91.2251	3.0596	1.8339e-22	1.9727e-20	UP	--	--	--	--	--	--	no KO assigned | (RefSeq) ribonuclease Y-like	http://www.genome.jp/dbget-bin/www_bget?sot:102598380	--	--
331	PGSC0003DMG400000547	12.83	0.30619	5.3889	0.012499	0.035743	UP	--	--	--	--	--	--	no KO assigned | (RefSeq) uncharacterized LOC102598055	http://www.genome.jp/dbget-bin/www_bget?sot:102598055	--	--
332	PGSC0003DMG400000548	930.034	395.949	1.232	2.1018e-06	1.7347e-05	UP	GO:0046483//GO:0044238//GO:0007275//GO:0009987//GO:0048513//GO:0048367//GO:0000902//GO:0090304//GO:0007049//GO:0016043//GO:0006996//GO:0032502//GO:0045927//GO:0040008//GO:0040007//GO:0044786//GO:0071840//GO:0006260//GO:0030307//GO:0006807//GO:0030154//GO:0009058//GO:0048468//GO:0009653//GO:0050794//GO:0006261//GO:0034641//GO:0048731//GO:0050789//GO:0044249//GO:0010090//GO:0001558//GO:0008150//GO:…	heterocycle metabolic process//primary metabolic process//multicellular organism development//cellular process//animal organ development//shoot system development//cell morphogenesis//nucleic acid metabolic process//cell cycle//cellular component organization//organelle organization//developmental process//positive regulation of growth//regulation of growth//growth//cell cycle DNA replication//ce…	GO:0044464//GO:0043226//GO:0005622//GO:0009330//GO:0005634//GO:0005623//GO:0032991//GO:0043227//GO:0043229//GO:0005575//GO:0043231//GO:0044424	cell part//organelle//intracellular//DNA topoisomerase complex (ATP-hydrolyzing)//nucleus//cell//protein-containing complex//membrane-bounded organelle//intracellular organelle//cellular_component//intracellular membrane-bounded organelle//intracellular part	GO:0097159//GO:0003677//GO:0003676//GO:1901363//GO:0003690//GO:0003674//GO:0005488	organic cyclic compound binding//DNA binding//nucleic acid binding//heterocyclic compound binding//double-stranded DNA binding//molecular_function//binding	no KO assigned | (RefSeq) DNA-binding protein BIN4	http://www.genome.jp/dbget-bin/www_bget?sot:102604513	BIN4	DNA-binding protein BIN4
333	PGSC0003DMG400000581	52.6202	11.1254	2.2418	0.00076799	0.0032548	UP	--	--	--	--	--	--	no KO assigned | (RefSeq) uncharacterized LOC102591225	http://www.genome.jp/dbget-bin/www_bget?sot:102591225	--	--
334	PGSC0003DMG400000620	589.819	201.23	1.5514	0.0032768	0.011386	UP	--	--	--	--	GO:0009055//GO:0003674	electron transfer activity//molecular_function	no KO assigned | (RefSeq) cucumber peeling cupredoxin-like	http://www.genome.jp/dbget-bin/www_bget?sot:102600455	-	Cupredoxin||Blue (type 1) copper protein, binding site||Phytocyanin domain
335	PGSC0003DMG400000627	82.5512	7.8254	3.3991	1.8456e-06	1.5409e-05	UP	--	--	GO:0005856//GO:0043228//GO:0005623//GO:0044430//GO:0005622//GO:0043226//GO:0044464//GO:0043232//GO:0005874//GO:0044424//GO:0005575//GO:0043229//GO:0044446//GO:0044422//GO:0015630//GO:0032991	cytoskeleton//non-membrane-bounded organelle//cell//cytoskeletal part//intracellular//organelle//cell part//intracellular non-membrane-bounded organelle//microtubule//intracellular part//cellular_component//intracellular organelle//intracellular organelle part//organelle part//microtubule cytoskeleton//protein-containing complex	GO:0005515//GO:0044877//GO:0008017//GO:0005488//GO:0008092//GO:0003674//GO:0015631	protein binding//protein-containing complex binding//microtubule binding//binding//cytoskeletal protein binding//molecular_function//tubulin binding	K10436 microtubule-associated protein, RP/EB family | (RefSeq) microtubule-associated protein RP/EB family member 1B	http://www.genome.jp/dbget-bin/www_bget?sot:102591204	-	EB1, C-terminal||Microtubule-associated protein RP/EB||Calponin homology domain
336	PGSC0003DMG400000653	4402.02	1962.24	1.1657	5.9296e-07	5.5888e-06	UP	GO:0009309//GO:0008150//GO:1901564//GO:0042401//GO:1901566//GO:0009308//GO:0044249//GO:0009446//GO:0034641//GO:0006596//GO:0009987//GO:0009058//GO:0006595//GO:0006807//GO:0006576//GO:0008152//GO:0044237//GO:0044271//GO:0097164//GO:0071704//GO:0044106//GO:0009445//GO:1901576	amine biosynthetic process//biological_process//organonitrogen compound metabolic process//cellular biogenic amine biosynthetic process//organonitrogen compound biosynthetic process//amine metabolic process//cellular biosynthetic process//putrescine biosynthetic process//cellular nitrogen compound metabolic process//polyamine biosynthetic process//cellular process//biosynthetic process//polyamine…	--	--	GO:0003824//GO:0016810//GO:0016813//GO:0016787//GO:0004668//GO:0047632//GO:0003674	catalytic activity//hydrolase activity, acting on carbon-nitrogen (but not peptide) bonds//hydrolase activity, acting on carbon-nitrogen (but not peptide) bonds, in linear amidines//hydrolase activity//protein-arginine deiminase activity//agmatine deiminase activity//molecular_function	K10536 agmatine deiminase [EC:3.5.3.12] | (RefSeq) agmatine deiminase	http://www.genome.jp/dbget-bin/www_bget?sot:102601245	EMB1873	Agmatine deiminase||Peptidyl-arginine deiminase, Porphyromonas-type
337	PGSC0003DMG400000676	2730.91	155.925	4.1305	6.1647e-51	4.916e-48	UP	GO:0090305//GO:0006807//GO:0010467//GO:0090304//GO:0006396//GO:0009987//GO:0046483//GO:0044238//GO:0008150//GO:0034641//GO:0016070//GO:0090502//GO:0090501//GO:0044260//GO:0006725//GO:0043170//GO:0071704//GO:0006139//GO:1901360//GO:0008152//GO:0044237	nucleic acid phosphodiester bond hydrolysis//nitrogen compound metabolic process//gene expression//nucleic acid metabolic process//RNA processing//cellular process//heterocycle metabolic process//primary metabolic process//biological_process//cellular nitrogen compound metabolic process//RNA metabolic process//RNA phosphodiester bond hydrolysis, endonucleolytic//RNA phosphodiester bond hydrolysis…	GO:0031224//GO:0005575//GO:0016021//GO:0016020//GO:0044425	intrinsic component of membrane//cellular_component//integral component of membrane//membrane//membrane part	GO:0004519//GO:0004518//GO:0004521//GO:0016788//GO:0032296//GO:0003824//GO:0016891//GO:0004540//GO:0003674//GO:0016893//GO:0004525//GO:0016787	endonuclease activity//nuclease activity//endoribonuclease activity//hydrolase activity, acting on ester bonds//double-stranded RNA-specific ribonuclease activity//catalytic activity//endoribonuclease activity, producing 5'-phosphomonoesters//ribonuclease activity//molecular_function//endonuclease activity, active with either ribo- or deoxyribonucleic acids and producing 5'-phosphomonoesters//rib…	no KO assigned | (RefSeq) ribonuclease 3-like protein 3	http://www.genome.jp/dbget-bin/www_bget?sot:102599637	-	Double-stranded RNA-binding domain||Ribonuclease III domain
338	PGSC0003DMG400000697	59.7556	16.6175	1.8464	0.0025397	0.0091704	UP	--	--	--	--	--	--	--	--	--	--
339	PGSC0003DMG400000721	49.0082	10.0025	2.2927	0.0090775	0.027238	UP	GO:0080090//GO:0090304//GO:1901362//GO:0046483//GO:0044238//GO:0051171//GO:0009987//GO:0006807//GO:0009058//GO:0010467//GO:0060255//GO:0010556//GO:0019438//GO:0034654//GO:0050794//GO:0018130//GO:0008150//GO:0031326//GO:0006355//GO:2000112//GO:0032774//GO:0010468//GO:0065007//GO:0016070//GO:0034641//GO:0009889//GO:0050789//GO:0031323//GO:0044249//GO:0019222//GO:0006725//GO:0097659//GO:0071704//GO:…	regulation of primary metabolic process//nucleic acid metabolic process//organic cyclic compound biosynthetic process//heterocycle metabolic process//primary metabolic process//regulation of nitrogen compound metabolic process//cellular process//nitrogen compound metabolic process//biosynthetic process//gene expression//regulation of macromolecule metabolic process//regulation of macromolecule bi…	--	--	GO:0097159//GO:0003677//GO:0003676//GO:1901363//GO:0003690//GO:0003674//GO:0005488	organic cyclic compound binding//DNA binding//nucleic acid binding//heterocyclic compound binding//double-stranded DNA binding//molecular_function//binding	K15032 mTERF domain-containing protein, mitochondrial | (RefSeq) uncharacterized LOC102604575	http://www.genome.jp/dbget-bin/www_bget?sot:102604575	-	Transcription termination factor, mitochondrial/chloroplastic
340	PGSC0003DMG400000724	384.753	60.2922	2.6739	5.8628e-09	8.4616e-08	UP	GO:0044237//GO:0008152//GO:0006793//GO:0043170//GO:0071704//GO:0016310//GO:0006464//GO:0044260//GO:0043412//GO:0044267//GO:0008150//GO:0036211//GO:0009987//GO:0006468//GO:0044238//GO:0006796//GO:0019538	cellular metabolic process//metabolic process//phosphorus metabolic process//macromolecule metabolic process//organic substance metabolic process//phosphorylation//cellular protein modification process//cellular macromolecule metabolic process//macromolecule modification//cellular protein metabolic process//biological_process//protein modification process//cellular process//protein phosphorylatio…	GO:0044425//GO:0016020//GO:0016021//GO:0005575//GO:0031224	membrane part//membrane//integral component of membrane//cellular_component//intrinsic component of membrane	GO:0016301//GO:0043168//GO:0005524//GO:0032553//GO:0005488//GO:0032555//GO:0035639//GO:0032550//GO:0032549//GO:0032559//GO:0097367//GO:1901265//GO:0043167//GO:0017076//GO:0036094//GO:0003674//GO:1901363//GO:0000166//GO:0001883//GO:0003824//GO:0030554//GO:0004672//GO:0016772//GO:0016740//GO:0001882//GO:0004674//GO:0097159//GO:0016773	kinase activity//anion binding//ATP binding//ribonucleotide binding//binding//purine ribonucleotide binding//purine ribonucleoside triphosphate binding//purine ribonucleoside binding//ribonucleoside binding//adenyl ribonucleotide binding//carbohydrate derivative binding//nucleoside phosphate binding//ion binding//purine nucleotide binding//small molecule binding//molecular_function//heterocyclic …	K04733 interleukin-1 receptor-associated kinase 4 [EC:2.7.11.1] | (RefSeq) probable receptor-like serine/threonine-protein kinase At4g34500	http://www.genome.jp/dbget-bin/www_bget?sot:102584374	-	Protein kinase, ATP binding site||Protein kinase domain||Serine/threonine-protein kinase, active site||Protein kinase-like domain
341	PGSC0003DMG400000725	181.284	69.4356	1.3845	0.012096	0.034743	UP	--	--	GO:0031224//GO:0044425//GO:0016020//GO:0005575//GO:0016021	intrinsic component of membrane//membrane part//membrane//cellular_component//integral component of membrane	--	--	no KO assigned | (RefSeq) uncharacterized protein At1g01500-like	http://www.genome.jp/dbget-bin/www_bget?sot:102585029	--	--
342	PGSC0003DMG400000729	461.769	196.293	1.2342	2.4295e-05	0.00015484	UP	--	--	--	--	--	--	no KO assigned | (RefSeq) uncharacterized LOC102588007	http://www.genome.jp/dbget-bin/www_bget?sot:102588007	--	--
343	PGSC0003DMG400000740	793.876	241.278	1.7182	2.7649e-10	5.2417e-09	UP	--	--	--	--	--	--	no KO assigned | (RefSeq) probable cyclic nucleotide-gated ion channel 17	http://www.genome.jp/dbget-bin/www_bget?sot:102592125	-	Cyclic nucleotide-binding-like||RmlC-like jelly roll fold||Cyclic nucleotide-binding domain
344	PGSC0003DMG400000750	110.655	42.8917	1.3673	0.0019132	0.0071888	UP	--	--	--	--	--	--	K15223 upstream activation factor subunit UAF30 | (RefSeq) upstream activation factor subunit spp27-like	http://www.genome.jp/dbget-bin/www_bget?sot:102599905	-	SWIB/MDM2 domain||SWIB domain||DEK, C-terminal
345	PGSC0003DMG400000776	1321.01	435.858	1.5997	0.0052429	0.017003	UP	GO:0009664//GO:0071555//GO:0045229//GO:0071840//GO:0071554//GO:0016043//GO:0009987//GO:0008150//GO:0071669	plant-type cell wall organization//cell wall organization//external encapsulating structure organization//cellular component organization or biogenesis//cell wall organization or biogenesis//cellular component organization//cellular process//biological_process//plant-type cell wall organization or biogenesis	--	--	GO:0005198//GO:0003674//GO:0005199	structural molecule activity//molecular_function//structural constituent of cell wall	--	--	-	Extensin domain
346	PGSC0003DMG400000783	66208.2	28670.4	1.2074	0.004431	0.014731	UP	GO:0071669//GO:0071840//GO:0045229//GO:0071555//GO:0009664//GO:0009987//GO:0016043//GO:0071554//GO:0008150	plant-type cell wall organization or biogenesis//cellular component organization or biogenesis//external encapsulating structure organization//cell wall organization//plant-type cell wall organization//cellular process//cellular component organization//cell wall organization or biogenesis//biological_process	--	--	GO:0003674//GO:0005199//GO:0005198	molecular_function//structural constituent of cell wall//structural molecule activity	--	--	-	Extensin domain
347	PGSC0003DMG400000827	437.864	198.595	1.1407	0.0012051	0.0048153	UP	--	--	GO:0043227//GO:0043231//GO:0005575//GO:0043229//GO:0005737//GO:0044424//GO:0005794//GO:0012505//GO:0043226//GO:0044464//GO:0005622//GO:0005623//GO:0044444	membrane-bounded organelle//intracellular membrane-bounded organelle//cellular_component//intracellular organelle//cytoplasm//intracellular part//Golgi apparatus//endomembrane system//organelle//cell part//intracellular//cell//cytoplasmic part	GO:0003674//GO:0016757//GO:0003824//GO:0016740	molecular_function//transferase activity, transferring glycosyl groups//catalytic activity//transferase activity	no KO assigned | (RefSeq) probable galacturonosyltransferase-like 3	http://www.genome.jp/dbget-bin/www_bget?sot:102584036	GATL3	Glycosyl transferase, family 8||Nucleotide-diphospho-sugar transferases
348	PGSC0003DMG400000839	115.195	54.4864	1.0801	0.011054	0.032163	UP	GO:0008150//GO:0032259//GO:0008152	biological_process//methylation//metabolic process	--	--	GO:0097159//GO:0005515//GO:0003824//GO:0003676//GO:0003677//GO:1901363//GO:0016740//GO:0046983//GO:0008171//GO:0008168//GO:0003674//GO:0016741//GO:0005488	organic cyclic compound binding//protein binding//catalytic activity//nucleic acid binding//DNA binding//heterocyclic compound binding//transferase activity//protein dimerization activity//O-methyltransferase activity//methyltransferase activity//molecular_function//transferase activity, transferring one-carbon groups//binding	no KO assigned | (RefSeq) uncharacterized LOC102601585	http://www.genome.jp/dbget-bin/www_bget?sot:102601585	-	O-methyltransferase COMT-type||Plant methyltransferase dimerisation||O-methyltransferase, family 2||Myb-like domain||Homeobox domain-like||Winged helix-turn-helix DNA-binding domain||S-adenosyl-L-methionine-dependent methyltransferase
349	PGSC0003DMG400000843	211.221	72.3596	1.5455	2.6127e-05	0.00016528	UP	GO:0008150//GO:0008152	biological_process//metabolic process	--	--	GO:0003824//GO:0003674//GO:0016787	catalytic activity//molecular_function//hydrolase activity	K18551 pyrimidine and pyridine-specific 5'-nucleotidase [EC:3.1.3.-] | (RefSeq) uncharacterized protein C24B11.05	http://www.genome.jp/dbget-bin/www_bget?sot:102604280	-	Pyrimidine 5-nucleotidase||HAD hydrolase, subfamily IA||HAD-like domain
350	PGSC0003DMG400000846	454.122	197.416	1.2018	3.1296e-05	0.00019447	UP	--	--	GO:0016020//GO:0016021//GO:0005575//GO:0044425//GO:0031224	membrane//integral component of membrane//cellular_component//membrane part//intrinsic component of membrane	--	--	--	--	--	--
351	PGSC0003DMG400000896	395.722	152.975	1.3712	5.7257e-06	4.2358e-05	UP	--	--	--	--	--	--	no KO assigned | (RefSeq) filament-like plant protein	http://www.genome.jp/dbget-bin/www_bget?sot:102593908	-	Filament-like plant protein
352	PGSC0003DMG400000897	79.5127	16.9369	2.231	8.192e-05	0.00045741	UP	--	--	--	--	--	--	no KO assigned | (RefSeq) lysM domain-containing GPI-anchored protein 1-like	http://www.genome.jp/dbget-bin/www_bget?sot:102593587	-	LysM domain
353	PGSC0003DMG400000936	2773.23	1373.71	1.0135	1.895e-05	0.00012392	UP	--	--	--	--	--	--	K17278 membrane-associated progesterone receptor component | (RefSeq) probable steroid-binding protein 3	http://www.genome.jp/dbget-bin/www_bget?sot:102583872	AtMAPR4	Cytochrome b5-like heme/steroid binding domain||-
354	PGSC0003DMG400001047	1160.22	523.029	1.1494	5.156e-06	3.8703e-05	UP	GO:0050794//GO:0008150//GO:0065007//GO:0050789//GO:0009987//GO:0045454//GO:0019725//GO:0042592//GO:0065008	regulation of cellular process//biological_process//biological regulation//regulation of biological process//cellular process//cell redox homeostasis//cellular homeostasis//homeostatic process//regulation of biological quality	GO:0005623//GO:0031224//GO:0044425//GO:0016020//GO:0005575//GO:0016021	cell//intrinsic component of membrane//membrane part//membrane//cellular_component//integral component of membrane	--	--	no KO assigned | (RefSeq) protein disulfide isomerase-like 5-4	http://www.genome.jp/dbget-bin/www_bget?sot:102606188	-	Thioredoxin-like fold||Thioredoxin domain||Endoplasmic reticulum vesicle transporter, C-terminal
355	PGSC0003DMG400001053	431.257	131.889	1.7092	1.128e-08	1.539e-07	UP	--	--	--	--	--	--	K07976 Rab family, other | (RefSeq) septum-promoting GTP-binding protein 1-like	http://www.genome.jp/dbget-bin/www_bget?sot:102579847	--	--
356	PGSC0003DMG400001088	13.2477	0.30619	5.4352	0.0045137	0.014961	UP	--	--	--	--	--	--	--	--	--	--
357	PGSC0003DMG400001119	2003.99	37.3383	5.7461	1.2846e-72	2.9336e-69	UP	--	--	GO:0043228//GO:0044427//GO:0005623//GO:0005622//GO:0005634//GO:0044464//GO:0000785//GO:0043226//GO:0032993//GO:0043232//GO:0044424//GO:0005575//GO:0043231//GO:0044422//GO:0000786//GO:0044815//GO:0044446//GO:0043229//GO:0043227//GO:0005694//GO:0032991	non-membrane-bounded organelle//chromosomal part//cell//intracellular//nucleus//cell part//chromatin//organelle//protein-DNA complex//intracellular non-membrane-bounded organelle//intracellular part//cellular_component//intracellular membrane-bounded organelle//organelle part//nucleosome//DNA packaging complex//intracellular organelle part//intracellular organelle//membrane-bounded organelle//chr…	GO:0046983//GO:0003677//GO:0003676//GO:1901363//GO:0005515//GO:0097159//GO:0046982//GO:0005488//GO:0003674	protein dimerization activity//DNA binding//nucleic acid binding//heterocyclic compound binding//protein binding//organic cyclic compound binding//protein heterodimerization activity//binding//molecular_function	K11253 histone H3 | (RefSeq) histone H3.2-like	http://www.genome.jp/dbget-bin/www_bget?sot:102584625	-	Histone-fold||Histone H3/CENP-A||Histone H2A/H2B/H3
358	PGSC0003DMG400001120	160.6	49.883	1.6868	2.4252e-05	0.00015464	UP	--	--	--	--	--	--	no KO assigned | (RefSeq) uncharacterized LOC102585265	http://www.genome.jp/dbget-bin/www_bget?sot:102585265	-	Ribosomal protein L7Ae/L30e/S12e/Gadd45||50S ribosomal protein L30e-like
359	PGSC0003DMG400001127	2866.84	1266	1.1792	1.4431e-06	1.2426e-05	UP	GO:0006323//GO:0051276//GO:0006333//GO:0034622//GO:0071824//GO:0065004//GO:0070271//GO:0006334//GO:0044085//GO:0043933//GO:0008150//GO:0071103//GO:0065003//GO:0031497//GO:0016043//GO:0006325//GO:0009987//GO:0034728//GO:0006996//GO:0022607//GO:0071840	DNA packaging//chromosome organization//chromatin assembly or disassembly//cellular protein-containing complex assembly//protein-DNA complex subunit organization//protein-DNA complex assembly//obsolete protein complex biogenesis//nucleosome assembly//cellular component biogenesis//protein-containing complex subunit organization//biological_process//DNA conformation change//protein-containing comp…	GO:0044424//GO:0043232//GO:0043227//GO:0005694//GO:0032991//GO:0005575//GO:0043231//GO:0044422//GO:0044815//GO:0000786//GO:0043229//GO:0044446//GO:0005623//GO:0043228//GO:0044427//GO:0044464//GO:0000785//GO:0043226//GO:0032993//GO:0005622//GO:0005634	intracellular part//intracellular non-membrane-bounded organelle//membrane-bounded organelle//chromosome//protein-containing complex//cellular_component//intracellular membrane-bounded organelle//organelle part//DNA packaging complex//nucleosome//intracellular organelle//intracellular organelle part//cell//non-membrane-bounded organelle//chromosomal part//cell part//chromatin//organelle//protein-…	GO:0005488//GO:0003674//GO:0003677//GO:0003676//GO:1901363//GO:0097159	binding//molecular_function//DNA binding//nucleic acid binding//heterocyclic compound binding//organic cyclic compound binding	K11275 histone H1/5 | (RefSeq) histone H1-like	http://www.genome.jp/dbget-bin/www_bget?sot:102591139	-	Winged helix-turn-helix DNA-binding domain||Histone H5||Linker histone H1/H5, domain H15
360	PGSC0003DMG400001137	86.7632	28.5678	1.6027	0.00094273	0.0038921	UP	--	--	--	--	--	--	no KO assigned | (RefSeq) uncharacterized mitochondrial protein AtMg01110-like	http://www.genome.jp/dbget-bin/www_bget?sot:102585573	-	RNA-dependent RNA polymerase, mitoviral
361	PGSC0003DMG400001179	2273.46	731.66	1.6356	1.767e-11	4.1667e-10	UP	GO:0008152//GO:0008150	metabolic process//biological_process	GO:0016020//GO:0016021//GO:0005575//GO:0044425//GO:0031224	membrane//integral component of membrane//cellular_component//membrane part//intrinsic component of membrane	GO:0003674//GO:0016787//GO:0003824	molecular_function//hydrolase activity//catalytic activity	K15889 prenylcysteine alpha-carboxyl methylesterase [EC:3.1.1.-] | (RefSeq) isoprenylcysteine alpha-carbonyl methylesterase ICME-like	http://www.genome.jp/dbget-bin/www_bget?sot:102602467	-	Alpha/beta hydrolase fold-3||Alpha/Beta hydrolase fold||Carboxylesterase, type B
362	PGSC0003DMG400001204	2612.68	1283.58	1.0254	0.013474	0.038126	UP	GO:0006972//GO:0050896//GO:0009628//GO:0008150//GO:0006970//GO:0006950//GO:0009651//GO:0042538	hyperosmotic response//response to stimulus//response to abiotic stimulus//biological_process//response to osmotic stress//response to stress//response to salt stress//hyperosmotic salinity response	GO:0044464//GO:0005829//GO:0005622//GO:0005623//GO:0044444//GO:0005575//GO:0005737//GO:0044424	cell part//cytosol//intracellular//cell//cytoplasmic part//cellular_component//cytoplasm//intracellular part	GO:0043169//GO:0043167//GO:0046872//GO:0003674//GO:0005488//GO:0005509	cation binding//ion binding//metal ion binding//molecular_function//binding//calcium ion binding	K02183 calmodulin | (RefSeq) calmodulin	http://www.genome.jp/dbget-bin/www_bget?sot:102593468	ATCP1	EF-hand domain pair||EF-Hand 1, calcium-binding site||EF-hand domain
363	PGSC0003DMG400001294	71.1516	26.6148	1.4187	0.0082323	0.025051	UP	--	--	--	--	--	--	no KO assigned | (RefSeq) F-box/kelch-repeat protein At3g23880-like	http://www.genome.jp/dbget-bin/www_bget?sot:102578815	-	F-box associated interaction domain||F-box domain
364	PGSC0003DMG400001358	15.3766	1.53709	3.3225	0.018032	0.048849	UP	--	--	--	--	--	--	no KO assigned | (RefSeq) uncharacterized LOC102585644	http://www.genome.jp/dbget-bin/www_bget?sot:102585644	-	Spo12
365	PGSC0003DMG400001377	28.992	4.5898	2.6592	0.0161	0.044352	UP	GO:0044271//GO:1903506//GO:1901360//GO:0006139//GO:0048522//GO:0044237//GO:0051173//GO:0031325//GO:0008152//GO:0009893//GO:0051252//GO:0045935//GO:0044260//GO:1901576//GO:2001141//GO:0051254//GO:0031328//GO:0045893//GO:0009059//GO:0019219//GO:0048518//GO:0045944//GO:0097659//GO:0071704//GO:0034645//GO:0006351//GO:0043170//GO:0006725//GO:0019222//GO:0050789//GO:1902680//GO:0044249//GO:0031323//GO:…	cellular nitrogen compound biosynthetic process//regulation of nucleic acid-templated transcription//organic cyclic compound metabolic process//nucleobase-containing compound metabolic process//positive regulation of cellular process//cellular metabolic process//positive regulation of nitrogen compound metabolic process//positive regulation of cellular metabolic process//metabolic process//positi…	GO:0044424//GO:0043229//GO:0043231//GO:0005575//GO:0043227//GO:0005623//GO:0005634//GO:0005622//GO:0043226//GO:0044464	intracellular part//intracellular organelle//intracellular membrane-bounded organelle//cellular_component//membrane-bounded organelle//cell//nucleus//intracellular//organelle//cell part	GO:0005488//GO:0003674//GO:0044212//GO:0001067//GO:0003700//GO:0001012//GO:0043565//GO:0000977//GO:0046983//GO:0000976//GO:1901363//GO:0003677//GO:0003676//GO:0005515//GO:0097159	binding//molecular_function//transcription regulatory region DNA binding//regulatory region nucleic acid binding//DNA-binding transcription factor activity//RNA polymerase II regulatory region DNA binding//sequence-specific DNA binding//RNA polymerase II regulatory region sequence-specific DNA binding//protein dimerization activity//transcription regulatory region sequence-specific DNA binding//h…	K09264 MADS-box transcription factor, plant | (RefSeq) developmental protein SEPALLATA 1	http://www.genome.jp/dbget-bin/www_bget?sot:102601754	-	Transcription factor, MADS-box||MADS MEF2-like||Transcription factor, K-box
366	PGSC0003DMG400001453	5609.27	2450.85	1.1945	3.0801e-07	3.083e-06	UP	--	--	GO:0031224//GO:0044425//GO:0016020//GO:0016021//GO:0005575	intrinsic component of membrane//membrane part//membrane//integral component of membrane//cellular_component	GO:1901363//GO:0003676//GO:0097159//GO:0003723//GO:0005488//GO:0003674	heterocyclic compound binding//nucleic acid binding//organic cyclic compound binding//RNA binding//binding//molecular_function	K12741 heterogeneous nuclear ribonucleoprotein A1/A3 | (RefSeq) RNA-binding protein precursor	http://www.genome.jp/dbget-bin/www_bget?sot:102577603	-	RNA recognition motif domain
367	PGSC0003DMG400001510	253.452	116.523	1.1211	0.00077248	0.0032696	UP	GO:0044238//GO:0009987//GO:0036211//GO:0006796//GO:0016311//GO:0019538//GO:0043412//GO:0044267//GO:0008150//GO:0071704//GO:0043170//GO:0044260//GO:0006464//GO:0044237//GO:0008152//GO:0006470//GO:0006793	primary metabolic process//cellular process//protein modification process//phosphate-containing compound metabolic process//dephosphorylation//protein metabolic process//macromolecule modification//cellular protein metabolic process//biological_process//organic substance metabolic process//macromolecule metabolic process//cellular macromolecule metabolic process//cellular protein modification pro…	--	--	GO:0043169//GO:0042578//GO:0003824//GO:0004722//GO:0016788//GO:0046872//GO:0043167//GO:0016791//GO:0003674//GO:0005488//GO:0004721//GO:0016787	cation binding//phosphoric ester hydrolase activity//catalytic activity//protein serine/threonine phosphatase activity//hydrolase activity, acting on ester bonds//metal ion binding//ion binding//phosphatase activity//molecular_function//binding//phosphoprotein phosphatase activity//hydrolase activity	K14803 protein phosphatase PTC2/3 [EC:3.1.3.16] | (RefSeq) probable protein phosphatase 2C 47	http://www.genome.jp/dbget-bin/www_bget?sot:102604344	-	PPM-type phosphatase domain||Protein phosphatase 2C family||PPM-type phosphatase, divalent cation binding
368	PGSC0003DMG400001522	456.551	162.714	1.4884	4.1917e-07	4.0815e-06	UP	--	--	--	--	--	--	no KO assigned | (RefSeq) uncharacterized LOC102592062	http://www.genome.jp/dbget-bin/www_bget?sot:102592062	--	--
369	PGSC0003DMG400001551	4908.9	1701.01	1.529	7.4254e-11	1.547e-09	UP	GO:0006725//GO:0071704//GO:0043170//GO:0044260//GO:0008152//GO:0044237//GO:1901360//GO:0006139//GO:0090304//GO:0044238//GO:0046483//GO:0009987//GO:0006396//GO:0006807//GO:0010467//GO:0008150//GO:0016070//GO:0034641	cellular aromatic compound metabolic process//organic substance metabolic process//macromolecule metabolic process//cellular macromolecule metabolic process//metabolic process//cellular metabolic process//organic cyclic compound metabolic process//nucleobase-containing compound metabolic process//nucleic acid metabolic process//primary metabolic process//heterocycle metabolic process//cellular pr…	--	--	--	--	no KO assigned | (RefSeq) uncharacterized LOC102581917	http://www.genome.jp/dbget-bin/www_bget?sot:102581917	-	HAT (Half-A-TPR) repeat||Tetratricopeptide repeat-containing domain||Tetratricopeptide-like helical domain
370	PGSC0003DMG400001558	325.043	135.092	1.2667	5.1427e-05	0.00030257	UP	--	--	GO:0005575//GO:0016021//GO:0016020//GO:0044425//GO:0031224	cellular_component//integral component of membrane//membrane//membrane part//intrinsic component of membrane	--	--	--	--	--	--
371	PGSC0003DMG400001562	409.829	204.657	1.0018	0.000784	0.0033132	UP	--	--	--	--	--	--	K15203 general transcription factor 3C polypeptide 6 | (RefSeq) general transcription factor 3C polypeptide 6-like	http://www.genome.jp/dbget-bin/www_bget?sot:102602778	-	Transcription factor TFIIIC, tau55-related
372	PGSC0003DMG400001591	21636.7	9451.62	1.1948	2.6154e-07	2.6564e-06	UP	GO:0006355//GO:0008150//GO:0031326//GO:0065007//GO:2000112//GO:0032774//GO:0010468//GO:0034641//GO:0009889//GO:0016070//GO:0031323//GO:0044249//GO:0050789//GO:0019438//GO:0034654//GO:0060255//GO:0010556//GO:0018130//GO:0050794//GO:0006807//GO:0009058//GO:0010467//GO:0080090//GO:0090304//GO:1901362//GO:0051171//GO:0009987//GO:0046483//GO:0044238//GO:1901360//GO:0006139//GO:1903506//GO:0044271//GO:…	regulation of transcription, DNA-templated//biological_process//regulation of cellular biosynthetic process//biological regulation//regulation of cellular macromolecule biosynthetic process//RNA biosynthetic process//regulation of gene expression//cellular nitrogen compound metabolic process//regulation of biosynthetic process//RNA metabolic process//regulation of cellular metabolic process//cell…	--	--	GO:0003676//GO:0003677//GO:1901363//GO:0046914//GO:0097159//GO:0043169//GO:0008270//GO:0005488//GO:0003674//GO:0043167//GO:0046872	nucleic acid binding//DNA binding//heterocyclic compound binding//transition metal ion binding//organic cyclic compound binding//cation binding//zinc ion binding//binding//molecular_function//ion binding//metal ion binding	no KO assigned | (RefSeq) glycine-rich protein 2-like	http://www.genome.jp/dbget-bin/www_bget?sot:102589937	-	Cold-shock protein, DNA-binding||Cold-shock conserved site||Zinc finger, CCHC-type||Cold shock domain||Nucleic acid-binding, OB-fold
373	PGSC0003DMG400001611	207.049	91.8289	1.173	0.00070515	0.0030239	UP	GO:0050896//GO:0042221//GO:0008150//GO:0010033//GO:0009725//GO:0009733//GO:0009719	response to stimulus//response to chemical//biological_process//response to organic substance//response to hormone//response to auxin//response to endogenous stimulus	--	--	--	--	--	--	-	Small auxin-up RNA
374	PGSC0003DMG400001634	870.316	171.006	2.3475	4.9642e-07	4.7633e-06	UP	--	--	GO:0031224//GO:0016020//GO:0005575//GO:0016021//GO:0044425	intrinsic component of membrane//membrane//cellular_component//integral component of membrane//membrane part	--	--	--	--	--	--
375	PGSC0003DMG400001655	421.401	130.082	1.6958	2.199e-08	2.8262e-07	UP	GO:0009733//GO:0009719//GO:0010033//GO:0009725//GO:0042221//GO:0008150//GO:0050896	response to auxin//response to endogenous stimulus//response to organic substance//response to hormone//response to chemical//biological_process//response to stimulus	--	--	--	--	K14488 SAUR family protein | (RefSeq) auxin-induced protein 6B	http://www.genome.jp/dbget-bin/www_bget?sot:102600202	-	Small auxin-up RNA
376	PGSC0003DMG400001661	3277.25	1420.21	1.2064	3.7385e-07	3.6848e-06	UP	GO:0008150//GO:0055114//GO:0008152	biological_process//oxidation-reduction process//metabolic process	--	--	GO:0016491//GO:0003824//GO:0003674	oxidoreductase activity//catalytic activity//molecular_function	K00011 aldehyde reductase [EC:1.1.1.21] | (RefSeq) NADP-dependent D-sorbitol-6-phosphate dehydrogenase-like	http://www.genome.jp/dbget-bin/www_bget?sot:102596820	-	NADP-dependent oxidoreductase domain||Aldo/keto reductase, conserved site||Aldo/keto reductase
377	PGSC0003DMG400001682	1027.06	364.348	1.4951	8.2051e-09	1.155e-07	UP	--	--	--	--	GO:0001882//GO:0019001//GO:0000166//GO:1901363//GO:0005525//GO:0003824//GO:0001883//GO:0017111//GO:0016462//GO:0032561//GO:0097159//GO:0035639//GO:0005488//GO:0032555//GO:0016817//GO:0032549//GO:0016787//GO:0032550//GO:0032553//GO:0003924//GO:0043168//GO:0017076//GO:0003674//GO:0016818//GO:0036094//GO:0097367//GO:0043167//GO:1901265	nucleoside binding//guanyl nucleotide binding//nucleotide binding//heterocyclic compound binding//GTP binding//catalytic activity//purine nucleoside binding//nucleoside-triphosphatase activity//pyrophosphatase activity//guanyl ribonucleotide binding//organic cyclic compound binding//purine ribonucleoside triphosphate binding//binding//purine ribonucleotide binding//hydrolase activity, acting on a…	no KO assigned | (RefSeq) dynamin-related protein 1E-like	http://www.genome.jp/dbget-bin/www_bget?sot:102582323	-	Dynamin central domain||GTPase effector domain||Dynamin superfamily||Dynamin GTPase effector
378	PGSC0003DMG400001685	3276.45	1614.55	1.021	1.3849e-05	9.3462e-05	UP	GO:0032787//GO:0008152//GO:0016053//GO:0044237//GO:0046394//GO:0006631//GO:1901576//GO:0044255//GO:0071704//GO:0006629//GO:0008150//GO:0044249//GO:0044283//GO:0019752//GO:0006633//GO:0008610//GO:0072330//GO:0009058//GO:0006082//GO:0044281//GO:0009987//GO:0044238//GO:0043436	monocarboxylic acid metabolic process//metabolic process//organic acid biosynthetic process//cellular metabolic process//carboxylic acid biosynthetic process//fatty acid metabolic process//organic substance biosynthetic process//cellular lipid metabolic process//organic substance metabolic process//lipid metabolic process//biological_process//cellular biosynthetic process//small molecule biosynth…	GO:0043233//GO:0005759//GO:0005737//GO:0044424//GO:0043231//GO:0005575//GO:0043229//GO:0044446//GO:0044422//GO:0070013//GO:0043227//GO:0044429//GO:0005739//GO:0044444//GO:0005623//GO:0005622//GO:0031974//GO:0043226//GO:0044464	organelle lumen//mitochondrial matrix//cytoplasm//intracellular part//intracellular membrane-bounded organelle//cellular_component//intracellular organelle//intracellular organelle part//organelle part//intracellular organelle lumen//membrane-bounded organelle//mitochondrial part//mitochondrion//cytoplasmic part//cell//intracellular//membrane-enclosed lumen//organelle//cell part	--	--	K03955 NADH dehydrogenase (ubiquinone) 1 alpha/beta subcomplex 1 | (RefSeq) acyl carrier protein 1, mitochondrial	http://www.genome.jp/dbget-bin/www_bget?sot:102585513	MTACP-1	Phosphopantetheine attachment site||Phosphopantetheine binding ACP domain||Acyl carrier protein (ACP)
379	PGSC0003DMG400001688	6454.13	2172.61	1.5708	1.703e-11	4.0317e-10	UP	--	--	--	--	--	--	no KO assigned | (RefSeq) uncharacterized LOC102588165	http://www.genome.jp/dbget-bin/www_bget?sot:102588165	-	Zf-FLZ domain
380	PGSC0003DMG400001703	251.302	92.3118	1.4448	3.0819e-05	0.00019169	UP	GO:0008150//GO:0048285//GO:0000280//GO:0071840//GO:0000278//GO:0007064//GO:0006996//GO:0098813//GO:0009987//GO:0016043//GO:0007049//GO:0000819//GO:0007059//GO:1903047//GO:0007062//GO:0022402//GO:0051276//GO:0000070	biological_process//organelle fission//nuclear division//cellular component organization or biogenesis//mitotic cell cycle//mitotic sister chromatid cohesion//organelle organization//nuclear chromosome segregation//cellular process//cellular component organization//cell cycle//sister chromatid segregation//chromosome segregation//mitotic cell cycle process//sister chromatid cohesion//cell cycle p…	GO:0044427//GO:0043228//GO:0005623//GO:0005622//GO:0043226//GO:0044464//GO:0043232//GO:0044424//GO:0044446//GO:0043229//GO:0044422//GO:0005575//GO:0032991//GO:0031390//GO:0005694	chromosomal part//non-membrane-bounded organelle//cell//intracellular//organelle//cell part//intracellular non-membrane-bounded organelle//intracellular part//intracellular organelle part//intracellular organelle//organelle part//cellular_component//protein-containing complex//Ctf18 RFC-like complex//chromosome	--	--	K11271 sister chromatid cohesion protein DCC1 | (RefSeq) sister chromatid cohesion protein DCC1	http://www.genome.jp/dbget-bin/www_bget?sot:102578670	-	Sister chromatid cohesion protein Dcc1
381	PGSC0003DMG400001718	5337.61	2128.74	1.3262	6.0932e-06	4.4756e-05	UP	GO:0044237//GO:0008152//GO:0071704//GO:0043170//GO:0044260//GO:0044267//GO:0008150//GO:0044238//GO:0009987//GO:0006457//GO:0019538	cellular metabolic process//metabolic process//organic substance metabolic process//macromolecule metabolic process//cellular macromolecule metabolic process//cellular protein metabolic process//biological_process//primary metabolic process//cellular process//protein folding//protein metabolic process	GO:0044424//GO:0005737//GO:0005575//GO:0005623//GO:0044464//GO:0005622	intracellular part//cytoplasm//cellular_component//cell//cell part//intracellular	--	--	K04078 chaperonin GroES | (RefSeq) 10 kDa chaperonin	http://www.genome.jp/dbget-bin/www_bget?sot:102586513	-	GroES-like||GroES chaperonin family
382	PGSC0003DMG400001739	420.145	81.8832	2.3592	8.0845e-06	5.7765e-05	UP	--	--	--	--	--	--	no KO assigned | (RefSeq) uncharacterized LOC102584571	http://www.genome.jp/dbget-bin/www_bget?sot:102584571	-	Alpha/beta hydrolase fold-1||Alpha/Beta hydrolase fold
383	PGSC0003DMG400001772	1364.8	615.439	1.149	4.8539e-06	3.6667e-05	UP	GO:0065007//GO:0032774//GO:2000112//GO:0010468//GO:0006355//GO:0008150//GO:0031326//GO:0044249//GO:0031323//GO:0050789//GO:0034641//GO:0009889//GO:0016070//GO:0019438//GO:0034654//GO:0060255//GO:0010556//GO:0018130//GO:0050794//GO:0009058//GO:0006807//GO:0010467//GO:1901362//GO:0080090//GO:0090304//GO:0009987//GO:0051171//GO:0044238//GO:0046483//GO:0044271//GO:1901360//GO:0006139//GO:1903506//GO:…	biological regulation//RNA biosynthetic process//regulation of cellular macromolecule biosynthetic process//regulation of gene expression//regulation of transcription, DNA-templated//biological_process//regulation of cellular biosynthetic process//cellular biosynthetic process//regulation of cellular metabolic process//regulation of biological process//cellular nitrogen compound metabolic process…	GO:0005623//GO:0005634//GO:0005622//GO:0031224//GO:0043226//GO:0044464//GO:0044425//GO:0044424//GO:0043231//GO:0005575//GO:0043229//GO:0016021//GO:0016020//GO:0043227	cell//nucleus//intracellular//intrinsic component of membrane//organelle//cell part//membrane part//intracellular part//intracellular membrane-bounded organelle//cellular_component//intracellular organelle//integral component of membrane//membrane//membrane-bounded organelle	GO:1901363//GO:0003676//GO:0003677//GO:0097159//GO:0005488//GO:0003674	heterocyclic compound binding//nucleic acid binding//DNA binding//organic cyclic compound binding//binding//molecular_function	no KO assigned | (RefSeq) DNA-binding protein S1FA-like	http://www.genome.jp/dbget-bin/www_bget?sot:102588755	-	DNA binding protein S1FA
384	PGSC0003DMG400001776	4450.91	1542	1.5293	0.0003934	0.0018271	UP	--	--	GO:0016020//GO:0016021//GO:0005575//GO:0044425//GO:0031224	membrane//integral component of membrane//cellular_component//membrane part//intrinsic component of membrane	GO:0046872//GO:0043167//GO:0003674//GO:0005488//GO:0008270//GO:0043169//GO:0046914	metal ion binding//ion binding//molecular_function//binding//zinc ion binding//cation binding//transition metal ion binding	no KO assigned | (RefSeq) uncharacterized LOC102593861	http://www.genome.jp/dbget-bin/www_bget?sot:102593861	-	E3 ubiquitin-protein ligase MARCH-like||Zinc finger, RING-CH-type||Zinc finger, RING/FYVE/PHD-type
385	PGSC0003DMG400001780	314.941	149.037	1.0794	0.00061974	0.0027017	UP	--	--	GO:0044430//GO:0005819//GO:0005623//GO:0044444//GO:0005856//GO:0043228//GO:0043226//GO:0044464//GO:0009524//GO:0005622//GO:0005874//GO:0044424//GO:0005876//GO:0005737//GO:0043232//GO:0032991//GO:0015630//GO:0043229//GO:0044446//GO:0044422//GO:0005575	cytoskeletal part//spindle//cell//cytoplasmic part//cytoskeleton//non-membrane-bounded organelle//organelle//cell part//phragmoplast//intracellular//microtubule//intracellular part//spindle microtubule//cytoplasm//intracellular non-membrane-bounded organelle//protein-containing complex//microtubule cytoskeleton//intracellular organelle//intracellular organelle part//organelle part//cellular_compo…	GO:0044877//GO:0005515//GO:0051011//GO:0008092//GO:0005488//GO:0008017//GO:0015631//GO:0003674	protein-containing complex binding//protein binding//microtubule minus-end binding//cytoskeletal protein binding//binding//microtubule binding//tubulin binding//molecular_function	no KO assigned | (RefSeq) AUGMIN subunit 7	http://www.genome.jp/dbget-bin/www_bget?sot:102588601	-	Plant AUGMIN subunit 7||HAUS augmin-like complex subunit 7-like
386	PGSC0003DMG400001786	148.837	23.8656	2.6407	1.2423e-08	1.6811e-07	UP	--	--	--	--	--	--	no KO assigned | (RefSeq) F-box/kelch-repeat protein SKIP25-like	http://www.genome.jp/dbget-bin/www_bget?sot:102593919	-	Kelch-type beta propeller
387	PGSC0003DMG400001788	1516.31	745.762	1.0238	3.3282e-05	0.00020551	UP	GO:0009059//GO:1901576//GO:0044260//GO:0006725//GO:0071704//GO:0097659//GO:0043170//GO:0006351//GO:0034645//GO:0044271//GO:0006139//GO:1901360//GO:0008152//GO:0044237//GO:0009058//GO:0006807//GO:0010467//GO:1901362//GO:0090304//GO:0046483//GO:0044238//GO:0009987//GO:0032774//GO:0008150//GO:0044249//GO:0016070//GO:0034641//GO:0034654//GO:0019438//GO:0018130	macromolecule biosynthetic process//organic substance biosynthetic process//cellular macromolecule metabolic process//cellular aromatic compound metabolic process//organic substance metabolic process//nucleic acid-templated transcription//macromolecule metabolic process//transcription, DNA-templated//cellular macromolecule biosynthetic process//cellular nitrogen compound biosynthetic process//nuc…	--	--	--	--	K03016 DNA-directed RNA polymerases I, II, and III subunit RPABC3 | (RefSeq) DNA-directed RNA polymerases II, IV and V subunit 8B-like	http://www.genome.jp/dbget-bin/www_bget?sot:102594913	-	Nucleic acid-binding, OB-fold||RNA polymerase, Rpb8
388	PGSC0003DMG400001841	6797.97	2684.92	1.3402	5.1501e-09	7.5023e-08	UP	--	--	--	--	--	--	K19042 E3 ubiquitin-protein ligase BOI and related proteins [EC:2.3.2.27] | (RefSeq) BOI-related E3 ubiquitin-protein ligase 1	http://www.genome.jp/dbget-bin/www_bget?sot:102582679	-	Zinc finger, RING-type||E3 ubiquitin-protein ligase BOI-like
389	PGSC0003DMG400001882	2040.28	943.53	1.1126	3.7508e-06	2.9173e-05	UP	--	--	--	--	--	--	K08819 cyclin-dependent kinase 12/13 [EC:2.7.11.22 2.7.11.23] | (RefSeq) cyclin-dependent kinase C-1-like	http://www.genome.jp/dbget-bin/www_bget?sot:102582666	--	--
390	PGSC0003DMG400001883	65.6153	18.7999	1.8033	0.001361	0.005353	UP	GO:0055085//GO:0008150//GO:0051234//GO:0006810//GO:0009987//GO:0051179	transmembrane transport//biological_process//establishment of localization//transport//cellular process//localization	GO:0044425//GO:0016020//GO:0005575//GO:0016021//GO:0031224	membrane part//membrane//cellular_component//integral component of membrane//intrinsic component of membrane	--	--	no KO assigned | (RefSeq) probable mitochondrial adenine nucleotide transporter BTL3	http://www.genome.jp/dbget-bin/www_bget?sot:102583762	-	Mitochondrial carrier domain||Mitochondrial substrate/solute carrier||Mitochondrial carrier protein
391	PGSC0003DMG400001886	2630.4	1267.88	1.0529	7.9262e-06	5.6729e-05	UP	--	--	GO:0031224//GO:0016020//GO:0016021//GO:0005575//GO:0044425	intrinsic component of membrane//membrane//integral component of membrane//cellular_component//membrane part	--	--	no KO assigned | (RefSeq) putative membrane-bound O-acyltransferase C24H6.01c	http://www.genome.jp/dbget-bin/www_bget?sot:102586308	-	Membrane bound O-acyl transferase, MBOAT
392	PGSC0003DMG400001888	67.2998	18.4866	1.8641	0.0013452	0.0053009	UP	--	--	--	--	--	--	no KO assigned | (RefSeq) uncharacterized LOC102587312	http://www.genome.jp/dbget-bin/www_bget?sot:102587312	-	Domain of unknown function DUF4057
393	PGSC0003DMG400001924	120.92	48.7876	1.3095	0.0021169	0.0078302	UP	GO:0019538//GO:0044238//GO:0008150//GO:0043170//GO:0071704//GO:0006508//GO:0008152	protein metabolic process//primary metabolic process//biological_process//macromolecule metabolic process//organic substance metabolic process//proteolysis//metabolic process	GO:0031012//GO:0005575	extracellular matrix//cellular_component	GO:0046914//GO:0043169//GO:0070011//GO:0003824//GO:0003674//GO:0008233//GO:0043167//GO:0046872//GO:0008270//GO:0016787//GO:0004175//GO:0008237//GO:0004222//GO:0005488	transition metal ion binding//cation binding//peptidase activity, acting on L-amino acid peptides//catalytic activity//molecular_function//peptidase activity//ion binding//metal ion binding//zinc ion binding//hydrolase activity//endopeptidase activity//metallopeptidase activity//metalloendopeptidase activity//binding	no KO assigned | (RefSeq) metalloendoproteinase 3-MMP-like	http://www.genome.jp/dbget-bin/www_bget?sot:102592421	-	Metallopeptidase, catalytic domain||Peptidoglycan binding-like||Peptidase, metallopeptidase||Peptidase M10, metallopeptidase||Peptidase M10A, catalytic domain||Peptidase M10A
394	PGSC0003DMG400001950	123.341	39.5515	1.6408	0.00018267	0.00093021	UP	--	--	GO:0031224//GO:0016021//GO:0005575//GO:0016020//GO:0044425	intrinsic component of membrane//integral component of membrane//cellular_component//membrane//membrane part	--	--	no KO assigned | (RefSeq) uncharacterized LOC102602791	http://www.genome.jp/dbget-bin/www_bget?sot:102602791	-	Immunoglobulin-like fold
395	PGSC0003DMG400001958	80.5792	34.4017	1.2279	0.0099883	0.029547	UP	GO:0055085//GO:0009987//GO:0051179//GO:0008150//GO:0006810//GO:0051234	transmembrane transport//cellular process//localization//biological_process//transport//establishment of localization	GO:0016020//GO:0005575//GO:0016021//GO:0044425//GO:0031224	membrane//cellular_component//integral component of membrane//membrane part//intrinsic component of membrane	GO:0003674//GO:0005215//GO:0022857	molecular_function//transporter activity//transmembrane transporter activity	no KO assigned | (RefSeq) WAT1-related protein At4g19185-like	http://www.genome.jp/dbget-bin/www_bget?sot:102580801	-	EamA domain||WAT1-related protein
396	PGSC0003DMG400001967	1249.16	395.692	1.6585	4.9523e-08	5.8744e-07	UP	--	--	GO:0044425//GO:0016021//GO:0005575//GO:0016020//GO:0031224	membrane part//integral component of membrane//cellular_component//membrane//intrinsic component of membrane	GO:0035639//GO:0005488//GO:0032555//GO:0032559//GO:0016817//GO:0032549//GO:0016787//GO:0032550//GO:0032553//GO:0005524//GO:0043168//GO:0017076//GO:0003674//GO:0016818//GO:0036094//GO:0097367//GO:1901265//GO:0043167//GO:0001882//GO:0016887//GO:0000166//GO:1901363//GO:0030554//GO:0003824//GO:0001883//GO:0017111//GO:0016462//GO:0097159	purine ribonucleoside triphosphate binding//binding//purine ribonucleotide binding//adenyl ribonucleotide binding//hydrolase activity, acting on acid anhydrides//ribonucleoside binding//hydrolase activity//purine ribonucleoside binding//ribonucleotide binding//ATP binding//anion binding//purine nucleotide binding//molecular_function//hydrolase activity, acting on acid anhydrides, in phosphorus-co…	no KO assigned | (RefSeq) ABC transporter G family member 14	http://www.genome.jp/dbget-bin/www_bget?sot:102579805	-	ABC transporter-like||P-loop containing nucleoside triphosphate hydrolase||AAA+ ATPase domain||ABC transporter, conserved site||ABC-2 type transporter
397	PGSC0003DMG400002007	43.8667	10.7951	2.0228	0.0044288	0.014728	UP	--	--	GO:0016020//GO:0016021//GO:0005575//GO:0044425//GO:0031224	membrane//integral component of membrane//cellular_component//membrane part//intrinsic component of membrane	--	--	--	--	-	Zinc finger, RING/FYVE/PHD-type||Zinc finger, RING-type
398	PGSC0003DMG400002020	44.0937	13.1823	1.742	0.010486	0.03076	UP	GO:0071840//GO:0022607//GO:0006360//GO:0010467//GO:0009058//GO:0006807//GO:0009987//GO:0042790//GO:0046483//GO:0044238//GO:1901362//GO:0016043//GO:0090304//GO:0044249//GO:0070897//GO:0009303//GO:0034641//GO:0016070//GO:0034660//GO:0065003//GO:0006361//GO:0032774//GO:0008150//GO:0018130//GO:0006352//GO:0043933//GO:0001188//GO:0034654//GO:0044085//GO:0019438//GO:1901576//GO:0044260//GO:0009059//GO:…	cellular component organization or biogenesis//cellular component assembly//transcription by RNA polymerase I//gene expression//biosynthetic process//nitrogen compound metabolic process//cellular process//nucleolar large rRNA transcription by RNA polymerase I//heterocycle metabolic process//primary metabolic process//organic cyclic compound biosynthetic process//cellular component organization//n…	GO:0031974//GO:0005634//GO:0005622//GO:0043226//GO:0044464//GO:0044798//GO:0005730//GO:0043228//GO:0005667//GO:0005623//GO:0043229//GO:0044446//GO:0070860//GO:0070013//GO:0044422//GO:0043231//GO:0005575//GO:0032991//GO:0044452//GO:0000120//GO:0043227//GO:0044428//GO:0043233//GO:0043232//GO:0044424//GO:0031981	membrane-enclosed lumen//nucleus//intracellular//organelle//cell part//nuclear transcription factor complex//nucleolus//non-membrane-bounded organelle//transcription factor complex//cell//intracellular organelle//intracellular organelle part//RNA polymerase I core factor complex//intracellular organelle lumen//organelle part//intracellular membrane-bounded organelle//cellular_component//protein-c…	GO:0001186//GO:0097159//GO:0043565//GO:0001169//GO:1901363//GO:0000976//GO:0003676//GO:0003677//GO:0001163//GO:0001164//GO:0001013//GO:0003674//GO:0001047//GO:0044212//GO:0001067//GO:0001046//GO:0001167//GO:0001082//GO:0003700//GO:0000988//GO:0005488//GO:0001134//GO:0000989	transcription factor activity, RNA polymerase I transcription factor recruiting//organic cyclic compound binding//sequence-specific DNA binding//obsolete transcription factor activity, RNA polymerase I CORE element sequence-specific binding//heterocyclic compound binding//transcription regulatory region sequence-specific DNA binding//nucleic acid binding//DNA binding//RNA polymerase I regulatory …	no KO assigned | (RefSeq) TATA box-binding protein-associated factor RNA polymerase I subunit B	http://www.genome.jp/dbget-bin/www_bget?sot:102596822	-	RNA polymerase I transcription initiation factor TAF1B/Rrn7
399	PGSC0003DMG400002027	40058.6	14804.5	1.4361	0.0006361	0.0027629	UP	--	--	GO:0005575//GO:0005576	cellular_component//extracellular region	--	--	K13449 pathogenesis-related protein 1 | (RefSeq) PR1B, pr1-1; pathogenesis-related protein 1b precursor	http://www.genome.jp/dbget-bin/www_bget?sot:102577780	-	Pathogenesis-related protein 1-like, SCP domain||CAP domain||Cysteine-rich secretory protein, allergen V5/Tpx-1-related||Allergen V5/Tpx-1-related, conserved site
400	PGSC0003DMG400002028	8340.95	1408.83	2.5657	1.1251e-08	1.5364e-07	UP	--	--	GO:0005575//GO:0005576	cellular_component//extracellular region	--	--	K13449 pathogenesis-related protein 1 | (RefSeq) PR1B, pr1-1; pathogenesis-related protein 1b precursor	http://www.genome.jp/dbget-bin/www_bget?sot:102577780	-	Pathogenesis-related protein 1-like, SCP domain||CAP domain||Allergen V5/Tpx-1-related, conserved site||Cysteine-rich secretory protein, allergen V5/Tpx-1-related
401	PGSC0003DMG400002029	24773.8	5014.69	2.3046	9.4458e-07	8.5417e-06	UP	--	--	GO:0005575//GO:0005576	cellular_component//extracellular region	--	--	K13449 pathogenesis-related protein 1 | (RefSeq) PR1B, pr1-1; pathogenesis-related protein 1b precursor	http://www.genome.jp/dbget-bin/www_bget?sot:102577780	-	Pathogenesis-related protein 1-like, SCP domain||CAP domain||Cysteine-rich secretory protein, allergen V5/Tpx-1-related||Allergen V5/Tpx-1-related, conserved site
402	PGSC0003DMG400002049	478.764	136.028	1.8154	4.4251e-07	4.282e-06	UP	GO:0010166//GO:1901576//GO:0006631//GO:0046394//GO:0000038//GO:0071704//GO:0009555//GO:0042761//GO:0032501//GO:0044255//GO:0032787//GO:0048856//GO:0044237//GO:0016053//GO:0008152//GO:0006082//GO:0032502//GO:0072330//GO:0009058//GO:0008610//GO:0007275//GO:0043436//GO:0044238//GO:0009987//GO:0044281//GO:0044249//GO:0008150//GO:0006629//GO:0006633//GO:0019752//GO:0010025//GO:0048229//GO:0044283	wax metabolic process//organic substance biosynthetic process//fatty acid metabolic process//carboxylic acid biosynthetic process//very long-chain fatty acid metabolic process//organic substance metabolic process//pollen development//very long-chain fatty acid biosynthetic process//multicellular organismal process//cellular lipid metabolic process//monocarboxylic acid metabolic process//anatomica…	GO:0043229//GO:0043231//GO:0005575//GO:0043227//GO:0044424//GO:0005737//GO:0005634//GO:0005622//GO:0043226//GO:0044464//GO:0012505//GO:0005783//GO:0005623//GO:0044444	intracellular organelle//intracellular membrane-bounded organelle//cellular_component//membrane-bounded organelle//intracellular part//cytoplasm//nucleus//intracellular//organelle//cell part//endomembrane system//endoplasmic reticulum//cell//cytoplasmic part	GO:0003674//GO:0016746//GO:0016747//GO:0016740//GO:0003824	molecular_function//transferase activity, transferring acyl groups//transferase activity, transferring acyl groups other than amino-acyl groups//transferase activity//catalytic activity	no KO assigned | (RefSeq) protein ECERIFERUM 1	http://www.genome.jp/dbget-bin/www_bget?sot:102582961	-	Transferase
403	PGSC0003DMG400002051	262.494	121.849	1.1072	0.00063223	0.0027485	UP	--	--	--	--	--	--	no KO assigned | (RefSeq) protein SABRE-like	http://www.genome.jp/dbget-bin/www_bget?sot:102586371	-	FMP27, C-terminal
404	PGSC0003DMG400002075	32.7529	0.918571	5.1561	5.973e-06	4.3947e-05	UP	GO:0030198//GO:0071554//GO:0016043//GO:0009987//GO:0009664//GO:0071555//GO:0040007//GO:0045229//GO:0071840//GO:0009832//GO:0022607//GO:0044085//GO:0070726//GO:0008150//GO:0010215//GO:0016049//GO:0071669//GO:0042546//GO:0043062//GO:0071668	extracellular matrix organization//cell wall organization or biogenesis//cellular component organization//cellular process//plant-type cell wall organization//cell wall organization//growth//external encapsulating structure organization//cellular component organization or biogenesis//plant-type cell wall biogenesis//cellular component assembly//cellular component biogenesis//cell wall assembly//b…	GO:0031224//GO:0016020//GO:0005575//GO:0044425//GO:0031225	intrinsic component of membrane//membrane//cellular_component//membrane part//anchored component of membrane	--	--	no KO assigned | (RefSeq) COBRA-like protein 10	http://www.genome.jp/dbget-bin/www_bget?sot:102598381	-	CRIB domain||COBRA, plant
405	PGSC0003DMG400002187	188.069	56.6801	1.7303	5.905e-06	4.3499e-05	UP	--	--	--	--	--	--	--	--	--	--
406	PGSC0003DMG400002238	95.6589	25.1155	1.9293	7.0802e-05	0.0004019	UP	--	--	--	--	--	--	--	--	--	--
407	PGSC0003DMG400002279	143.098	18.3582	2.9625	5.6354e-10	1.0097e-08	UP	--	--	--	--	--	--	no KO assigned | (RefSeq) 187-kDa microtubule-associated protein AIR9	http://www.genome.jp/dbget-bin/www_bget?sot:102590895	--	--
408	PGSC0003DMG400002408	2129.48	557.328	1.9339	6.3991e-15	2.5603e-13	UP	GO:0030163//GO:0030162//GO:0043170//GO:0009894//GO:0071704//GO:0019222//GO:0032268//GO:0044260//GO:0045862//GO:0048518//GO:0044257//GO:0044237//GO:0044265//GO:0009893//GO:0051603//GO:0031325//GO:0045732//GO:0008152//GO:0031331//GO:0048522//GO:0006508//GO:1903362//GO:1903050//GO:0042176//GO:0032270//GO:1903364//GO:0009987//GO:0044238//GO:0044248//GO:0031329//GO:0010604//GO:1901800//GO:0080090//GO:…	protein catabolic process//regulation of proteolysis//macromolecule metabolic process//regulation of catabolic process//organic substance metabolic process//regulation of metabolic process//regulation of cellular protein metabolic process//cellular macromolecule metabolic process//positive regulation of proteolysis//positive regulation of biological process//cellular protein catabolic process//ce…	GO:0005575//GO:0044424//GO:0005737//GO:0044464//GO:0005622//GO:0005623	cellular_component//intracellular part//cytoplasm//cell part//intracellular//cell	GO:0097367//GO:0036402//GO:1901265//GO:0043167//GO:0017076//GO:0036094//GO:0016818//GO:0003674//GO:0043168//GO:0005524//GO:0032553//GO:0042623//GO:0032555//GO:0005488//GO:0035639//GO:0032550//GO:0016787//GO:0032549//GO:0016817//GO:0032559//GO:0016462//GO:0097159//GO:0017111//GO:1901363//GO:0016887//GO:0000166//GO:0001883//GO:0003824//GO:0030554//GO:0001882	carbohydrate derivative binding//proteasome-activating ATPase activity//nucleoside phosphate binding//ion binding//purine nucleotide binding//small molecule binding//hydrolase activity, acting on acid anhydrides, in phosphorus-containing anhydrides//molecular_function//anion binding//ATP binding//ribonucleotide binding//ATPase activity, coupled//purine ribonucleotide binding//binding//purine ribo…	K03063 26S proteasome regulatory subunit T3 | (RefSeq) 26S protease regulatory subunit 6B homolog	http://www.genome.jp/dbget-bin/www_bget?sot:102579765	-	26S proteasome regulatory subunit P45-like||AAA+ ATPase domain||ATPase, AAA-type, core||ATPase, AAA-type, conserved site||P-loop containing nucleoside triphosphate hydrolase||26S Proteasome regulatory subunit 6B
409	PGSC0003DMG400002455	448.816	124.101	1.8546	1.1402e-09	1.9093e-08	UP	--	--	--	--	--	--	no KO assigned | (RefSeq) uncharacterized LOC102595323	http://www.genome.jp/dbget-bin/www_bget?sot:102595323	-	Protein of unknown function DUF1365
410	PGSC0003DMG400002464	489.606	190.008	1.3656	3.1745e-06	2.5092e-05	UP	--	--	--	--	GO:0008270//GO:0005488//GO:0003674//GO:0043167//GO:0046872//GO:0046914//GO:0043169	zinc ion binding//binding//molecular_function//ion binding//metal ion binding//transition metal ion binding//cation binding	--	--	-	DYW domain||Pentatricopeptide repeat||Tetratricopeptide-like helical domain
411	PGSC0003DMG400002474	599.425	200.511	1.5799	2.6597e-08	3.3715e-07	UP	--	--	--	--	--	--	--	--	-	P-loop containing nucleoside triphosphate hydrolase
412	PGSC0003DMG400002525	4068.36	1955.57	1.0569	5.3535e-06	3.9944e-05	UP	GO:0019752//GO:0046128//GO:0033500//GO:1901135//GO:0009119//GO:0072521//GO:0009116//GO:0006091//GO:0006163//GO:0009126//GO:0006732//GO:0009185//GO:0009135//GO:0006090//GO:0009259//GO:0034641//GO:0019693//GO:1901657//GO:0065007//GO:0008150//GO:1901564//GO:0006757//GO:0055082//GO:0009199//GO:0006733//GO:0019725//GO:0006165//GO:0046483//GO:0044238//GO:0046031//GO:0043436//GO:0009987//GO:0044281//GO:…	carboxylic acid metabolic process//purine ribonucleoside metabolic process//carbohydrate homeostasis//carbohydrate derivative metabolic process//ribonucleoside metabolic process//purine-containing compound metabolic process//nucleoside metabolic process//generation of precursor metabolites and energy//purine nucleotide metabolic process//purine nucleoside monophosphate metabolic process//coenzyme…	GO:0009536//GO:0005623//GO:0009527//GO:0044444//GO:0031967//GO:0019867//GO:0042170//GO:0044434//GO:0043226//GO:0009941//GO:0044464//GO:0031975//GO:0031224//GO:0005622//GO:0044424//GO:0044425//GO:0009507//GO:0005737//GO:0031969//GO:0009707//GO:0031968//GO:0098588//GO:0031090//GO:0043227//GO:0016020//GO:0044435//GO:0043229//GO:0044446//GO:0044422//GO:0016021//GO:0098805//GO:0043231//GO:0009526//GO:…	plastid//cell//plastid outer membrane//cytoplasmic part//organelle envelope//outer membrane//plastid membrane//chloroplast part//organelle//chloroplast envelope//cell part//envelope//intrinsic component of membrane//intracellular//intracellular part//membrane part//chloroplast//cytoplasm//chloroplast membrane//chloroplast outer membrane//organelle outer membrane//bounding membrane of organelle//o…	GO:1901363//GO:0000166//GO:0001883//GO:0030554//GO:0003824//GO:0030246//GO:0016740//GO:0016772//GO:0001882//GO:0097159//GO:0016773//GO:0016301//GO:0005524//GO:0043168//GO:0032553//GO:0032555//GO:0005488//GO:0035639//GO:0032550//GO:0032559//GO:0032549//GO:0004396//GO:0097367//GO:0043167//GO:1901265//GO:0048029//GO:0019200//GO:0017076//GO:0036094//GO:0003674//GO:0005536	heterocyclic compound binding//nucleotide binding//purine nucleoside binding//adenyl nucleotide binding//catalytic activity//carbohydrate binding//transferase activity//transferase activity, transferring phosphorus-containing groups//nucleoside binding//organic cyclic compound binding//phosphotransferase activity, alcohol group as acceptor//kinase activity//ATP binding//anion binding//ribonucleot…	K00844 hexokinase [EC:2.7.1.1] | (RefSeq) HXK1, StHK1, hexokinase, hxk; hexokinase-1	http://www.genome.jp/dbget-bin/www_bget?sot:102604144	-	Hexokinase, binding site||Hexokinase, C-terminal||Hexokinase||Hexokinase, N-terminal
413	PGSC0003DMG400002527	1070.4	342.252	1.645	2.6123e-10	4.9714e-09	UP	--	--	--	--	--	--	K15075 DNA repair/transcription protein MET18/MMS19 | (RefSeq) MMS19 nucleotide excision repair protein homolog	http://www.genome.jp/dbget-bin/www_bget?sot:102585560	-	Armadillo-like helical
414	PGSC0003DMG400002533	110.295	52.1085	1.0818	0.013373	0.037886	UP	--	--	--	--	--	--	no KO assigned | (RefSeq) uncharacterized LOC102582031	http://www.genome.jp/dbget-bin/www_bget?sot:102582031	--	--
415	PGSC0003DMG400002535	29.415	0.361026	6.3483	2.5928e-06	2.0945e-05	UP	--	--	GO:0044425//GO:0071944//GO:0005575//GO:0016021//GO:0016020//GO:0005886//GO:0005623//GO:0031224//GO:0044464	membrane part//cell periphery//cellular_component//integral component of membrane//membrane//plasma membrane//cell//intrinsic component of membrane//cell part	--	--	no KO assigned | (RefSeq) CASP-like protein 3A1	http://www.genome.jp/dbget-bin/www_bget?sot:102582702	-	Casparian strip membrane protein||Domain of unknown function DUF588
416	PGSC0003DMG400002545	103.647	39.1922	1.403	0.0018676	0.0070371	UP	GO:0007017//GO:0009987//GO:0008150	microtubule-based process//cellular process//biological_process	GO:0044422//GO:0044446//GO:0043229//GO:0005875//GO:0005575//GO:0030286//GO:0032991//GO:0015630//GO:0043232//GO:0044424//GO:1902494//GO:0005622//GO:0044464//GO:0043226//GO:0043228//GO:0005856//GO:0044430//GO:0005623	organelle part//intracellular organelle part//intracellular organelle//microtubule associated complex//cellular_component//dynein complex//protein-containing complex//microtubule cytoskeleton//intracellular non-membrane-bounded organelle//intracellular part//catalytic complex//intracellular//cell part//organelle//non-membrane-bounded organelle//cytoskeleton//cytoskeletal part//cell	--	--	K10418 dynein light chain LC8-type | (RefSeq) dynein light chain 1, cytoplasmic-like	http://www.genome.jp/dbget-bin/www_bget?sot:102589624	-	Dynein light chain, type 1/2
417	PGSC0003DMG400002561	804.443	149.551	2.4274	3.4333e-10	6.3985e-09	UP	--	--	--	--	--	--	no KO assigned | (RefSeq) F-box/kelch-repeat protein At1g80440-like	http://www.genome.jp/dbget-bin/www_bget?sot:102600650	-	Kelch repeat type 1||Kelch-type beta propeller||F-box domain
418	PGSC0003DMG400002614	14.7143	0.667216	4.4629	0.0056259	0.018066	UP	--	--	--	--	--	--	no KO assigned | (RefSeq) uncharacterized LOC102585896	http://www.genome.jp/dbget-bin/www_bget?sot:102585896	--	--
419	PGSC0003DMG400002621	280.938	127.139	1.1438	0.00043556	0.0019955	UP	--	--	--	--	--	--	K17925 sorting nexin-13 | (RefSeq) uncharacterized LOC102586355	http://www.genome.jp/dbget-bin/www_bget?sot:102586355	--	--
420	PGSC0003DMG400002660	15.2782	0	Inf	0.00048538	0.0021926	UP	GO:0009737//GO:0010467//GO:1901700//GO:0009058//GO:0010557//GO:0006807//GO:0010628//GO:0044238//GO:0046483//GO:0009987//GO:0051171//GO:1901362//GO:0090304//GO:0080090//GO:0010604//GO:0050789//GO:1902680//GO:0044249//GO:0031323//GO:0016070//GO:0009889//GO:0034641//GO:0010468//GO:0032774//GO:2000112//GO:0065007//GO:0042221//GO:0031326//GO:0008150//GO:0006355//GO:0050794//GO:0018130//GO:0050896//GO:…	response to abscisic acid//gene expression//response to oxygen-containing compound//biosynthetic process//positive regulation of macromolecule biosynthetic process//nitrogen compound metabolic process//positive regulation of gene expression//primary metabolic process//heterocycle metabolic process//cellular process//regulation of nitrogen compound metabolic process//organic cyclic compound biosyn…	GO:0005634//GO:0005622//GO:0043226//GO:0044464//GO:0005623//GO:0043229//GO:0043231//GO:0005575//GO:0043227//GO:0044424	nucleus//intracellular//organelle//cell part//cell//intracellular organelle//intracellular membrane-bounded organelle//cellular_component//membrane-bounded organelle//intracellular part	GO:0003674//GO:0003700	molecular_function//DNA-binding transcription factor activity	K14432 ABA responsive element binding factor | (RefSeq) protein ABSCISIC ACID-INSENSITIVE 5	http://www.genome.jp/dbget-bin/www_bget?sot:102594056	ABI5	Basic-leucine zipper domain||Protein ABSCISIC ACID-INSENSITIVE 5
421	PGSC0003DMG400002662	522.523	243.301	1.1028	0.00021158	0.0010605	UP	--	--	--	--	--	--	--	--	--	--
422	PGSC0003DMG400002663	65.7737	22.0649	1.5758	0.0051816	0.01685	UP	--	--	--	--	GO:1901363//GO:0003676//GO:0003723//GO:0097159//GO:0005488//GO:0003674	heterocyclic compound binding//nucleic acid binding//RNA binding//organic cyclic compound binding//binding//molecular_function	no KO assigned | (RefSeq) APO protein 3, mitochondrial	http://www.genome.jp/dbget-bin/www_bget?sot:102585880	APO3	APO domain
423	PGSC0003DMG400002664	56.4441	13.0007	2.1182	0.0011583	0.0046606	UP	GO:0009987//GO:0044238//GO:0006468//GO:0036211//GO:0006796//GO:0019538//GO:0043412//GO:0044267//GO:0008150//GO:0043170//GO:0071704//GO:0016310//GO:0006464//GO:0044260//GO:0044237//GO:0008152//GO:0006793	cellular process//primary metabolic process//protein phosphorylation//protein modification process//phosphate-containing compound metabolic process//protein metabolic process//macromolecule modification//cellular protein metabolic process//biological_process//macromolecule metabolic process//organic substance metabolic process//phosphorylation//cellular protein modification process//cellular macr…	--	--	GO:0097159//GO:0016773//GO:0000166//GO:1901363//GO:0003824//GO:0030554//GO:0001883//GO:0004672//GO:0001882//GO:0016772//GO:0016740//GO:0097367//GO:1901265//GO:0043167//GO:0017076//GO:0003674//GO:0036094//GO:0016301//GO:0032553//GO:0043168//GO:0005524//GO:0035639//GO:0032555//GO:0005488//GO:0032549//GO:0032559//GO:0032550	organic cyclic compound binding//phosphotransferase activity, alcohol group as acceptor//nucleotide binding//heterocyclic compound binding//catalytic activity//adenyl nucleotide binding//purine nucleoside binding//protein kinase activity//nucleoside binding//transferase activity, transferring phosphorus-containing groups//transferase activity//carbohydrate derivative binding//nucleoside phosphate…	no KO assigned | (RefSeq) serine/threonine-protein kinase KIPK-like	http://www.genome.jp/dbget-bin/www_bget?sot:102586543	-	Serine/threonine-protein kinase, active site||Protein kinase domain||Protein kinase-like domain
424	PGSC0003DMG400002689	10.4295	0.30619	5.0901	0.015884	0.043867	UP	GO:0009987//GO:0006468//GO:0044238//GO:0036211//GO:0071554//GO:0071840//GO:0006796//GO:0009832//GO:0019538//GO:0043412//GO:0044267//GO:0044085//GO:0008150//GO:0043170//GO:0071704//GO:0016310//GO:0006464//GO:0044260//GO:0009834//GO:0042546//GO:0071669//GO:0044237//GO:0008152//GO:0006793	cellular process//protein phosphorylation//primary metabolic process//protein modification process//cell wall organization or biogenesis//cellular component organization or biogenesis//phosphate-containing compound metabolic process//plant-type cell wall biogenesis//protein metabolic process//macromolecule modification//cellular protein metabolic process//cellular component biogenesis//biological…	GO:0044464//GO:0031224//GO:0005623//GO:0005886//GO:0016020//GO:0016021//GO:0005575//GO:0071944//GO:0044425	cell part//intrinsic component of membrane//cell//plasma membrane//membrane//integral component of membrane//cellular_component//cell periphery//membrane part	GO:0097159//GO:0016773//GO:0000166//GO:1901363//GO:0003824//GO:0030554//GO:0001883//GO:0004672//GO:0001882//GO:0016772//GO:0016740//GO:0097367//GO:1901265//GO:0043167//GO:0017076//GO:0003674//GO:0036094//GO:0016301//GO:0032553//GO:0043168//GO:0005524//GO:0035639//GO:0005488//GO:0032555//GO:0032549//GO:0032559//GO:0032550	organic cyclic compound binding//phosphotransferase activity, alcohol group as acceptor//nucleotide binding//heterocyclic compound binding//catalytic activity//adenyl nucleotide binding//purine nucleoside binding//protein kinase activity//nucleoside binding//transferase activity, transferring phosphorus-containing groups//transferase activity//carbohydrate derivative binding//nucleoside phosphate…	no KO assigned | (RefSeq) leucine-rich repeat receptor-like protein kinase PXC1	http://www.genome.jp/dbget-bin/www_bget?sot:102599868	-	Serine-threonine/tyrosine-protein kinase, catalytic domain||Protein kinase-like domain||Leucine-rich repeat-containing N-terminal, plant-type||Protein kinase domain||Leucine-rich repeat||Leucine-rich repeat domain, L domain-like
425	PGSC0003DMG400002707	42.4488	1.95908	4.4375	1.308e-06	1.1411e-05	UP	--	--	GO:0044427//GO:0043228//GO:0005623//GO:0005622//GO:0005634//GO:0000785//GO:0044464//GO:0032993//GO:0043226//GO:0043232//GO:0044424//GO:0044422//GO:0043229//GO:0044446//GO:0000786//GO:0044815//GO:0005575//GO:0043231//GO:0005694//GO:0032991//GO:0043227	chromosomal part//non-membrane-bounded organelle//cell//intracellular//nucleus//chromatin//cell part//protein-DNA complex//organelle//intracellular non-membrane-bounded organelle//intracellular part//organelle part//intracellular organelle//intracellular organelle part//nucleosome//DNA packaging complex//cellular_component//intracellular membrane-bounded organelle//chromosome//protein-containing …	GO:0046983//GO:0003676//GO:0003677//GO:1901363//GO:0005515//GO:0097159//GO:0046982//GO:0005488//GO:0003674	protein dimerization activity//nucleic acid binding//DNA binding//heterocyclic compound binding//protein binding//organic cyclic compound binding//protein heterodimerization activity//binding//molecular_function	K11251 histone H2A | (RefSeq) histone H2AX-like	http://www.genome.jp/dbget-bin/www_bget?sot:102587542	-	Histone H2A conserved site||Histone-fold||Histone H2A||Histone H2A/H2B/H3||Histone H2A, C-terminal domain
426	PGSC0003DMG400002713	1457.33	689.7	1.0793	1.1503e-05	7.9364e-05	UP	--	--	--	--	GO:0016787//GO:0003674//GO:0003824	hydrolase activity//molecular_function//catalytic activity	no KO assigned | (RefSeq) uncharacterized LOC102591403	http://www.genome.jp/dbget-bin/www_bget?sot:102591403	-	Calcineurin-like phosphoesterase domain, ApaH type||Metallo-dependent phosphatase-like||Serine/threonine-specific protein phosphatase/bis(5-nucleosyl)-tetraphosphatase
427	PGSC0003DMG400002752	13.2367	0	Inf	0.001365	0.0053667	UP	GO:0051179//GO:0009987//GO:0008150//GO:0051234//GO:0006810//GO:0055085	localization//cellular process//biological_process//establishment of localization//transport//transmembrane transport	GO:0031224//GO:0016021//GO:0005575//GO:0016020//GO:0044425	intrinsic component of membrane//integral component of membrane//cellular_component//membrane//membrane part	GO:0005215//GO:0022857//GO:0003674	transporter activity//transmembrane transporter activity//molecular_function	no KO assigned | (RefSeq) WAT1-related protein At1g09380	http://www.genome.jp/dbget-bin/www_bget?sot:102591428	-	WAT1-related protein||EamA domain
428	PGSC0003DMG400002758	163.754	78.7958	1.0553	0.0050596	0.016501	UP	--	--	--	--	--	--	no KO assigned | (RefSeq) uncharacterized LOC102580710	http://www.genome.jp/dbget-bin/www_bget?sot:102580710	-	Agenet-like domain||Agenet domain, plant type
429	PGSC0003DMG400002787	54.592	4.53668	3.589	1.606e-06	1.3642e-05	UP	--	--	GO:0016021//GO:0005575//GO:0016020//GO:0044425//GO:0031224	integral component of membrane//cellular_component//membrane//membrane part//intrinsic component of membrane	GO:0003674//GO:0016787//GO:0016788//GO:0003824	molecular_function//hydrolase activity//hydrolase activity, acting on ester bonds//catalytic activity	no KO assigned | (RefSeq) GDSL esterase/lipase At1g09390-like	http://www.genome.jp/dbget-bin/www_bget?sot:102592882	-	GDSL lipase/esterase-like, plant||SGNH hydrolase-type esterase domain||GDSL lipase/esterase
430	PGSC0003DMG400002807	359.14	174.409	1.0421	0.00052346	0.0023403	UP	--	--	--	--	--	--	no KO assigned | (RefSeq) uncharacterized LOC102600562	http://www.genome.jp/dbget-bin/www_bget?sot:102600562	-	DUF3741-associated sequence motif||Domain of unknown function DUF4378
431	PGSC0003DMG400002808	107.628	12.856	3.0655	3.728e-06	2.9011e-05	UP	GO:0009415//GO:0071462//GO:0044260//GO:0070417//GO:0006725//GO:0009409//GO:0043170//GO:0007154//GO:0071704//GO:0071496//GO:0009605//GO:0009991//GO:0006139//GO:1901360//GO:0006950//GO:0008152//GO:1901701//GO:0051716//GO:0044237//GO:0006807//GO:0033554//GO:0042631//GO:1901700//GO:0006310//GO:0010035//GO:0070887//GO:0090304//GO:0009266//GO:0009987//GO:0046483//GO:0044238//GO:0071229//GO:0071214//GO:…	response to water//cellular response to water stimulus//cellular macromolecule metabolic process//cellular response to cold//cellular aromatic compound metabolic process//response to cold//macromolecule metabolic process//cell communication//organic substance metabolic process//cellular response to external stimulus//response to external stimulus//response to extracellular stimulus//nucleobase-co…	--	--	GO:0003674//GO:0016818//GO:0036094//GO:0070035//GO:0017076//GO:0043167//GO:1901265//GO:0097367//GO:0016817//GO:0032549//GO:0032559//GO:0016787//GO:0032550//GO:0008026//GO:0035639//GO:0042623//GO:0005488//GO:0032555//GO:0032553//GO:0043168//GO:0005524//GO:0017111//GO:0097159//GO:0016462//GO:0004386//GO:0001882//GO:0003824//GO:0030554//GO:0001883//GO:0016887//GO:0000166//GO:0003676//GO:1901363	molecular_function//hydrolase activity, acting on acid anhydrides, in phosphorus-containing anhydrides//small molecule binding//purine NTP-dependent helicase activity//purine nucleotide binding//ion binding//nucleoside phosphate binding//carbohydrate derivative binding//hydrolase activity, acting on acid anhydrides//ribonucleoside binding//adenyl ribonucleotide binding//hydrolase activity//purine…	K10901 bloom syndrome protein [EC:3.6.4.12] | (RefSeq) ATP-dependent DNA helicase Q-like 1	http://www.genome.jp/dbget-bin/www_bget?sot:102600231	RECQI1	P-loop containing nucleoside triphosphate hydrolase||DNA/RNA helicase, ATP-dependent, DEAH-box type, conserved site||DNA helicase, ATP-dependent, RecQ type||ATP-dependent DNA helicase RecQ, zinc-binding domain||Helicase, C-terminal||Helicase superfamily 1/2, ATP-binding domain||DEAD/DEAH box helicase domain
432	PGSC0003DMG400002847	207.12	55.9147	1.8892	0.00021135	0.0010595	UP	--	--	--	--	--	--	no KO assigned | (RefSeq) uncharacterized LOC102599098	http://www.genome.jp/dbget-bin/www_bget?sot:102599098	--	--
433	PGSC0003DMG400002850	1447.9	591.569	1.2913	2.0232e-07	2.1009e-06	UP	GO:0044249//GO:0008150//GO:0006629//GO:0006796//GO:0009058//GO:0008610//GO:0006720//GO:0044238//GO:0009987//GO:0008299//GO:0006793//GO:0044237//GO:0008152//GO:0006721//GO:0016114//GO:1901576//GO:0071704//GO:0016310//GO:0044255	cellular biosynthetic process//biological_process//lipid metabolic process//phosphate-containing compound metabolic process//biosynthetic process//lipid biosynthetic process//isoprenoid metabolic process//primary metabolic process//cellular process//isoprenoid biosynthetic process//phosphorus metabolic process//cellular metabolic process//metabolic process//terpenoid metabolic process//terpenoid …	GO:0005623//GO:0044444//GO:0005829//GO:0005622//GO:0044464//GO:0044424//GO:0005737//GO:0005575	cell//cytoplasmic part//cytosol//intracellular//cell part//intracellular part//cytoplasm//cellular_component	GO:0016740//GO:0016772//GO:0001882//GO:1901363//GO:0000166//GO:0001883//GO:0030554//GO:0003824//GO:0097159//GO:0005488//GO:0032555//GO:0035639//GO:0032550//GO:0032559//GO:0032549//GO:0016301//GO:0005524//GO:0043168//GO:0032553//GO:0017076//GO:0036094//GO:0003674//GO:0097367//GO:1901265//GO:0043167	transferase activity//transferase activity, transferring phosphorus-containing groups//nucleoside binding//heterocyclic compound binding//nucleotide binding//purine nucleoside binding//adenyl nucleotide binding//catalytic activity//organic cyclic compound binding//binding//purine ribonucleotide binding//purine ribonucleoside triphosphate binding//purine ribonucleoside binding//adenyl ribonucleoti…	no KO assigned | (RefSeq) glutamate 5-kinase	http://www.genome.jp/dbget-bin/www_bget?sot:102588327	-	Fosfomycin resistance kinase, FomA-type||Aspartate/glutamate/uridylate kinase
434	PGSC0003DMG400002883	127.724	37.373	1.773	0.012209	0.03502	UP	GO:0007275//GO:0032502//GO:0008150//GO:0032501	multicellular organism development//developmental process//biological_process//multicellular organismal process	--	--	--	--	no KO assigned | (RefSeq) axial regulator YABBY 5-like	http://www.genome.jp/dbget-bin/www_bget?sot:102597616	-	YABBY protein||High mobility group box domain
435	PGSC0003DMG400002895	74750	293.144	7.9943	3.8754e-06	3.0009e-05	UP	GO:0008150//GO:0009987//GO:0044238//GO:0005985//GO:0044237//GO:0009311//GO:0008152//GO:0071704//GO:0044262//GO:0005975//GO:0005984	biological_process//cellular process//primary metabolic process//sucrose metabolic process//cellular metabolic process//oligosaccharide metabolic process//metabolic process//organic substance metabolic process//cellular carbohydrate metabolic process//carbohydrate metabolic process//disaccharide metabolic process	--	--	GO:0016157//GO:0003824//GO:0008194//GO:0016740//GO:0046527//GO:0035251//GO:0016758//GO:0016757//GO:0003674	sucrose synthase activity//catalytic activity//UDP-glycosyltransferase activity//transferase activity//glucosyltransferase activity//UDP-glucosyltransferase activity//transferase activity, transferring hexosyl groups//transferase activity, transferring glycosyl groups//molecular_function	K00695 sucrose synthase [EC:2.4.1.13] | (RefSeq) SS16, sus4; Sucrose synthase	http://www.genome.jp/dbget-bin/www_bget?sot:102577594	-	Glycosyl transferase, family 1||Sucrose synthase, plant/cyanobacteria||Sucrose synthase
436	PGSC0003DMG400002898	184.841	12.9029	3.8405	3.4676e-16	1.7389e-14	UP	GO:0009892//GO:0050790//GO:0008152//GO:0044092//GO:0019222//GO:0043086//GO:0050789//GO:0008150//GO:0065007//GO:0048519//GO:0065009	negative regulation of metabolic process//regulation of catalytic activity//metabolic process//negative regulation of molecular function//regulation of metabolic process//negative regulation of catalytic activity//regulation of biological process//biological_process//biological regulation//negative regulation of biological process//regulation of molecular function	--	--	GO:0098772//GO:0030234//GO:0003674//GO:0004857	molecular function regulator//enzyme regulator activity//molecular_function//enzyme inhibitor activity	no KO assigned | (RefSeq) 21 kDa protein-like	http://www.genome.jp/dbget-bin/www_bget?sot:102605501	-	Pectinesterase inhibitor domain
437	PGSC0003DMG400002928	70.2815	26.8999	1.3855	0.0085777	0.025945	UP	--	--	--	--	--	--	K13993 HSP20 family protein | (RefSeq) 18.2 kDa class I heat shock protein-like	http://www.genome.jp/dbget-bin/www_bget?sot:102606179	-	Alpha crystallin/Hsp20 domain||HSP20-like chaperone||Small heat shock protein HSP20
438	PGSC0003DMG400002965	592.801	278.653	1.0891	5.9564e-05	0.00034511	UP	GO:0065004//GO:0070271//GO:0071824//GO:0034622//GO:0006334//GO:0051276//GO:0006323//GO:0006333//GO:0006325//GO:0009987//GO:0016043//GO:0031497//GO:0022607//GO:0071840//GO:0006996//GO:0034728//GO:0043933//GO:0044085//GO:0065003//GO:0008150//GO:0071103	protein-DNA complex assembly//obsolete protein complex biogenesis//protein-DNA complex subunit organization//cellular protein-containing complex assembly//nucleosome assembly//chromosome organization//DNA packaging//chromatin assembly or disassembly//chromatin organization//cellular process//cellular component organization//chromatin assembly//cellular component assembly//cellular component organ…	GO:0032991//GO:0005694//GO:0043227//GO:0044815//GO:0000786//GO:0044446//GO:0043229//GO:0044422//GO:0043231//GO:0005575//GO:0044424//GO:0043232//GO:0043226//GO:0032993//GO:0044464//GO:0000785//GO:0005634//GO:0005622//GO:0005623//GO:0044427//GO:0043228	protein-containing complex//chromosome//membrane-bounded organelle//DNA packaging complex//nucleosome//intracellular organelle part//intracellular organelle//organelle part//intracellular membrane-bounded organelle//cellular_component//intracellular part//intracellular non-membrane-bounded organelle//organelle//protein-DNA complex//cell part//chromatin//nucleus//intracellular//cell//chromosomal p…	GO:0003674//GO:0005488//GO:0046982//GO:0097159//GO:0005515//GO:1901363//GO:0003677//GO:0003676//GO:0046983	molecular_function//binding//protein heterodimerization activity//organic cyclic compound binding//protein binding//heterocyclic compound binding//DNA binding//nucleic acid binding//protein dimerization activity	K11254 histone H4 | (RefSeq) histone H4	http://www.genome.jp/dbget-bin/www_bget?sot:102590298	-	Histone H4||Histone H4, conserved site||Histone-fold||CENP-T/Histone H4, histone fold
439	PGSC0003DMG400002971	454.843	76.7527	2.5671	4.348e-09	6.4349e-08	UP	GO:1901657//GO:0019693//GO:0034641//GO:0015672//GO:0009259//GO:0009199//GO:0051234//GO:0098662//GO:0006810//GO:1901564//GO:0008150//GO:0006163//GO:0009126//GO:0006091//GO:0072521//GO:0009116//GO:0009119//GO:1901135//GO:0046128//GO:0015980//GO:0051179//GO:0009060//GO:0006796//GO:0055114//GO:0009150//GO:0006807//GO:0019637//GO:0009987//GO:0044238//GO:0046483//GO:0009167//GO:0098655//GO:0044281//GO:…	glycosyl compound metabolic process//ribose phosphate metabolic process//cellular nitrogen compound metabolic process//monovalent inorganic cation transport//ribonucleotide metabolic process//ribonucleoside triphosphate metabolic process//establishment of localization//inorganic cation transmembrane transport//transport//organonitrogen compound metabolic process//biological_process//purine nucleo…	GO:0031967//GO:0005743//GO:0070469//GO:0044444//GO:0005623//GO:0019866//GO:0005622//GO:0044464//GO:0043226//GO:0031224//GO:0031975//GO:0005740//GO:0031966//GO:0044424//GO:0005737//GO:0044425//GO:0016021//GO:0044422//GO:0044446//GO:0043229//GO:0005575//GO:0043231//GO:0005739//GO:0044429//GO:0016020//GO:0043227//GO:0031090	organelle envelope//mitochondrial inner membrane//respiratory chain//cytoplasmic part//cell//organelle inner membrane//intracellular//cell part//organelle//intrinsic component of membrane//envelope//mitochondrial envelope//mitochondrial membrane//intracellular part//cytoplasm//membrane part//integral component of membrane//organelle part//intracellular organelle part//intracellular organelle//cel…	GO:0016491//GO:0022890//GO:0022857//GO:0015002//GO:1901363//GO:0008324//GO:0020037//GO:0003824//GO:0015075//GO:0005215//GO:0046914//GO:0016676//GO:0043169//GO:0097159//GO:0009055//GO:0005506//GO:0005488//GO:0004129//GO:0046906//GO:0015077//GO:0003674//GO:0046872//GO:0016675//GO:0015078//GO:0043167	oxidoreductase activity//inorganic cation transmembrane transporter activity//transmembrane transporter activity//heme-copper terminal oxidase activity//heterocyclic compound binding//cation transmembrane transporter activity//heme binding//catalytic activity//ion transmembrane transporter activity//transporter activity//transition metal ion binding//oxidoreductase activity, acting on a heme grou…	--	--	COX1	Cytochrome c oxidase-like, subunit I domain||Cytochrome c oxidase subunit I||Cytochrome c oxidase, subunit I, copper-binding site
440	PGSC0003DMG400002989	177.405	72.1205	1.2986	0.0014568	0.0056793	UP	GO:0008152//GO:0008150//GO:0009058	metabolic process//biological_process//biosynthetic process	--	--	GO:0016829//GO:0016840//GO:0003674//GO:0016844//GO:0003824//GO:0016843	lyase activity//carbon-nitrogen lyase activity//molecular_function//strictosidine synthase activity//catalytic activity//amine-lyase activity	K21407 adipocyte plasma membrane-associated protein | (RefSeq) protein STRICTOSIDINE SYNTHASE-LIKE 3-like	http://www.genome.jp/dbget-bin/www_bget?sot:102605007	-	Strictosidine synthase||Six-bladed beta-propeller, TolB-like||Strictosidine synthase, conserved region
441	PGSC0003DMG400003008	33.8974	5.32583	2.6701	0.0015233	0.0058993	UP	--	--	--	--	--	--	K10400 kinesin family member 15 | (RefSeq) phragmoplast orienting kinesin 2	http://www.genome.jp/dbget-bin/www_bget?sot:102602992	--	--
442	PGSC0003DMG400003031	135.303	32.7281	2.0476	2.9665e-06	2.3575e-05	UP	--	--	--	--	--	--	--	--	--	--
443	PGSC0003DMG400003067	793.878	361.391	1.1354	1.7501e-05	0.00011505	UP	GO:0032259//GO:0008152//GO:0008150	methylation//metabolic process//biological_process	GO:0071944//GO:0005737//GO:0098791//GO:0044424//GO:0005794//GO:0005802//GO:0005886//GO:0016020//GO:0043227//GO:0031984//GO:0043231//GO:0005575//GO:0043229//GO:0044446//GO:0044422//GO:0044431//GO:0044444//GO:0005623//GO:0012505//GO:0043226//GO:0044464//GO:0005768//GO:0005622	cell periphery//cytoplasm//Golgi subcompartment//intracellular part//Golgi apparatus//trans-Golgi network//plasma membrane//membrane//membrane-bounded organelle//organelle subcompartment//intracellular membrane-bounded organelle//cellular_component//intracellular organelle//intracellular organelle part//organelle part//Golgi apparatus part//cytoplasmic part//cell//endomembrane system//organelle//…	GO:0016741//GO:0008168//GO:0003674//GO:0003824//GO:0016740	transferase activity, transferring one-carbon groups//methyltransferase activity//molecular_function//catalytic activity//transferase activity	no KO assigned | (RefSeq) uncharacterized LOC102592036	http://www.genome.jp/dbget-bin/www_bget?sot:102592036	-	S-adenosyl-L-methionine-dependent methyltransferase||Putative S-adenosyl-L-methionine-dependent methyltransferase
444	PGSC0003DMG400003088	2180.12	1086.55	1.0047	3.3783e-05	0.00020795	UP	--	--	--	--	--	--	no KO assigned | (RefSeq) uncharacterized LOC102586072	http://www.genome.jp/dbget-bin/www_bget?sot:102586072	--	--
445	PGSC0003DMG400003103	19969.4	8811.82	1.1803	2.9256e-07	2.9393e-06	UP	GO:0008150//GO:0009987//GO:0006796//GO:0044237//GO:0008152//GO:0006793	biological_process//cellular process//phosphate-containing compound metabolic process//cellular metabolic process//metabolic process//phosphorus metabolic process	GO:0005623//GO:0044464//GO:0005622//GO:0044424//GO:0005737//GO:0005575	cell//cell part//intracellular//intracellular part//cytoplasm//cellular_component	GO:0003824//GO:0016462//GO:0043169//GO:0000287//GO:0005488//GO:0016817//GO:0004427//GO:0016787//GO:0046872//GO:0043167//GO:0003674//GO:0016818	catalytic activity//pyrophosphatase activity//cation binding//magnesium ion binding//binding//hydrolase activity, acting on acid anhydrides//inorganic diphosphatase activity//hydrolase activity//metal ion binding//ion binding//molecular_function//hydrolase activity, acting on acid anhydrides, in phosphorus-containing anhydrides	K01507 inorganic pyrophosphatase [EC:3.6.1.1] | (RefSeq) soluble inorganic pyrophosphatase 6, chloroplastic-like	http://www.genome.jp/dbget-bin/www_bget?sot:102600433	-	Inorganic pyrophosphatase
446	PGSC0003DMG400003109	445.882	132.748	1.748	7.2675e-09	1.034e-07	UP	--	--	GO:0044464//GO:0005622//GO:0005623//GO:0005575	cell part//intracellular//cell//cellular_component	GO:0043169//GO:0046914//GO:0046872//GO:0043167//GO:0003674//GO:0005488//GO:0008270	cation binding//transition metal ion binding//metal ion binding//ion binding//molecular_function//binding//zinc ion binding	no KO assigned | (RefSeq) B-box zinc finger protein 19-like	http://www.genome.jp/dbget-bin/www_bget?sot:102578169	-	B-box-type zinc finger
447	PGSC0003DMG400003123	13593.4	4819.99	1.4958	2.2194e-10	4.2868e-09	UP	GO:0044237//GO:0009144//GO:0046939//GO:0008152//GO:1901360//GO:0006139//GO:0072524//GO:0032787//GO:0009141//GO:0006793//GO:0042278//GO:0006753//GO:0009132//GO:0009123//GO:0071704//GO:0009117//GO:0019362//GO:0006096//GO:0006725//GO:0016310//GO:0009161//GO:0046496//GO:0005975//GO:0055086//GO:0016052//GO:0046034//GO:0006163//GO:0009126//GO:0006091//GO:0009116//GO:0072521//GO:1901135//GO:0009119//GO:…	cellular metabolic process//purine nucleoside triphosphate metabolic process//nucleotide phosphorylation//metabolic process//organic cyclic compound metabolic process//nucleobase-containing compound metabolic process//pyridine-containing compound metabolic process//monocarboxylic acid metabolic process//nucleoside triphosphate metabolic process//phosphorus metabolic process//purine nucleoside met…	--	--	GO:0016829//GO:0016832//GO:0004332//GO:0003674//GO:0003824//GO:0016830	lyase activity//aldehyde-lyase activity//fructose-bisphosphate aldolase activity//molecular_function//catalytic activity//carbon-carbon lyase activity	K01623 fructose-bisphosphate aldolase, class I [EC:4.1.2.13] | (RefSeq) plastidic aldolase	http://www.genome.jp/dbget-bin/www_bget?sot:102577738	-	Fructose-bisphosphate aldolase, class-I||Aldolase-type TIM barrel||Fructose-bisphosphate aldolase class-I active site
448	PGSC0003DMG400003129	383.13	31.598	3.5999	1.285e-17	7.7379e-16	UP	--	--	--	--	GO:0005488//GO:0003674//GO:1901363//GO:0003676//GO:0097159	binding//molecular_function//heterocyclic compound binding//nucleic acid binding//organic cyclic compound binding	--	--	-	RNA recognition motif domain||Mei2-like protein||Mei2/Mei2-like, C-terminal RNA recognition motif
449	PGSC0003DMG400003186	125.587	57.14	1.1361	0.014509	0.04057	UP	--	--	GO:0031224//GO:0044425//GO:0005575//GO:0016021//GO:0016020	intrinsic component of membrane//membrane part//cellular_component//integral component of membrane//membrane	--	--	--	--	--	--
450	PGSC0003DMG400003189	1811.45	601.597	1.5903	2.0415e-10	3.9638e-09	UP	--	--	--	--	--	--	no KO assigned | (RefSeq) uncharacterized LOC102597502	http://www.genome.jp/dbget-bin/www_bget?sot:102597502	-	Protein of unknown function DUF1068
451	PGSC0003DMG400003212	821.533	356.171	1.2057	5.3378e-06	3.9857e-05	UP	GO:0009987//GO:0051171//GO:0044238//GO:0046483//GO:0080090//GO:0090304//GO:1901362//GO:0006807//GO:0009058//GO:0018130//GO:0050794//GO:0019438//GO:0034654//GO:0060255//GO:0010556//GO:0034641//GO:0009889//GO:0016070//GO:0044249//GO:0031323//GO:0050789//GO:0008150//GO:0031326//GO:0065007//GO:0032774//GO:0043170//GO:0097659//GO:0071704//GO:0019222//GO:0006725//GO:2001141//GO:0044260//GO:1901576//GO:…	cellular process//regulation of nitrogen compound metabolic process//primary metabolic process//heterocycle metabolic process//regulation of primary metabolic process//nucleic acid metabolic process//organic cyclic compound biosynthetic process//nitrogen compound metabolic process//biosynthetic process//heterocycle biosynthetic process//regulation of cellular process//aromatic compound biosynthet…	--	--	GO:0003713//GO:0003712//GO:0003674//GO:0000989//GO:0000988	transcription coactivator activity//transcription coregulator activity//molecular_function//transcription factor activity, transcription factor binding//transcription factor activity, protein binding	no KO assigned | (RefSeq) GRF1-interacting factor 2-like	http://www.genome.jp/dbget-bin/www_bget?sot:102582966	-	SS18 family||AttH-like domain
452	PGSC0003DMG400003220	10.7951	0.30619	5.1398	0.015328	0.042543	UP	GO:0019222//GO:0006725//GO:0006351//GO:0034645//GO:0043170//GO:0097659//GO:0071704//GO:0019219//GO:0009059//GO:2001141//GO:0044260//GO:1901576//GO:0051252//GO:0008152//GO:0044237//GO:1901360//GO:0006139//GO:1903506//GO:0044271//GO:0080090//GO:0090304//GO:1901362//GO:0051171//GO:0009987//GO:0046483//GO:0044238//GO:0006807//GO:0009058//GO:0010467//GO:0032502//GO:0019438//GO:0034654//GO:0060255//GO:…	regulation of metabolic process//cellular aromatic compound metabolic process//transcription, DNA-templated//cellular macromolecule biosynthetic process//macromolecule metabolic process//nucleic acid-templated transcription//organic substance metabolic process//regulation of nucleobase-containing compound metabolic process//macromolecule biosynthetic process//regulation of RNA biosynthetic proces…	GO:0043227//GO:0005575//GO:0043231//GO:0043229//GO:0044424//GO:0044464//GO:0043226//GO:0005622//GO:0005634//GO:0005623	membrane-bounded organelle//cellular_component//intracellular membrane-bounded organelle//intracellular organelle//intracellular part//cell part//organelle//intracellular//nucleus//cell	GO:0043167//GO:1901265//GO:0097367//GO:0003674//GO:0036094//GO:0017076//GO:0032553//GO:0043168//GO:0005524//GO:0032549//GO:0032559//GO:0032550//GO:0035639//GO:0032555//GO:0005488//GO:0097159//GO:0030554//GO:0001883//GO:0000166//GO:1901363//GO:0001882	ion binding//nucleoside phosphate binding//carbohydrate derivative binding//molecular_function//small molecule binding//purine nucleotide binding//ribonucleotide binding//anion binding//ATP binding//ribonucleoside binding//adenyl ribonucleotide binding//purine ribonucleoside binding//purine ribonucleoside triphosphate binding//purine ribonucleotide binding//binding//organic cyclic compound bindin…	no KO assigned | (RefSeq) growth-regulating factor 3	http://www.genome.jp/dbget-bin/www_bget?sot:102583957	AtGRF7	Glutamine-Leucine-Glutamine, QLQ||WRC domain||Growth-regulating factor
453	PGSC0003DMG400003242	39.461	11.1544	1.8228	0.011714	0.033824	UP	--	--	--	--	--	--	--	--	--	--
454	PGSC0003DMG400003290	318.377	80.5324	1.9831	2.6216e-09	4.06e-08	UP	--	--	GO:0005575//GO:0016021//GO:0016020//GO:0044425//GO:0031224	cellular_component//integral component of membrane//membrane//membrane part//intrinsic component of membrane	--	--	no KO assigned | (RefSeq) uncharacterized LOC102588020	http://www.genome.jp/dbget-bin/www_bget?sot:102588020	--	--
455	PGSC0003DMG400003293	39.7109	2.19817	4.1752	7.38e-06	5.3179e-05	UP	GO:0008150//GO:0016043//GO:0007049//GO:0009987//GO:0007010//GO:0071840//GO:0006996//GO:0022402//GO:0007017//GO:0051301//GO:0000910//GO:0000226	biological_process//cellular component organization//cell cycle//cellular process//cytoskeleton organization//cellular component organization or biogenesis//organelle organization//cell cycle process//microtubule-based process//cell division//cytokinesis//microtubule cytoskeleton organization	--	--	GO:0044877//GO:0005515//GO:0008092//GO:0008017//GO:0005488//GO:0003674//GO:0015631	protein-containing complex binding//protein binding//cytoskeletal protein binding//microtubule binding//binding//molecular_function//tubulin binding	K16732 protein regulator of cytokinesis 1 | (RefSeq) 65-kDa microtubule-associated protein 5	http://www.genome.jp/dbget-bin/www_bget?sot:102591226	MAP65-5	Microtubule-associated protein, MAP65/Ase1/PRC1
456	PGSC0003DMG400003367	30.9829	6.23827	2.3123	0.0070028	0.021786	UP	--	--	--	--	--	--	no KO assigned | (RefSeq) uncharacterized LOC102585280	http://www.genome.jp/dbget-bin/www_bget?sot:102585280	-	Protein of unknown function PDDEXK-like
457	PGSC0003DMG400003384	119.196	18.2765	2.7053	4.2624e-08	5.1377e-07	UP	GO:0044249//GO:0034641//GO:0008150//GO:0006259//GO:0048229//GO:0006260//GO:0032502//GO:0009058//GO:0006807//GO:0007275//GO:0044238//GO:0046483//GO:0009987//GO:0090304//GO:0006139//GO:1901360//GO:0048856//GO:0044237//GO:0008152//GO:1901576//GO:0044260//GO:0009059//GO:0071704//GO:0043170//GO:0034645//GO:0009555//GO:0006725//GO:0032501	cellular biosynthetic process//cellular nitrogen compound metabolic process//biological_process//DNA metabolic process//gametophyte development//DNA replication//developmental process//biosynthetic process//nitrogen compound metabolic process//multicellular organism development//primary metabolic process//heterocycle metabolic process//cellular process//nucleic acid metabolic process//nucleobase-…	GO:0044427//GO:0043228//GO:0000228//GO:0005623//GO:0031974//GO:0005634//GO:0005622//GO:0043226//GO:0044464//GO:0043233//GO:0043232//GO:0044424//GO:0005664//GO:0031981//GO:0044446//GO:0043229//GO:0070013//GO:0044422//GO:0043231//GO:0000808//GO:0005575//GO:0032991//GO:0005694//GO:0043227//GO:0044428//GO:0044454	chromosomal part//non-membrane-bounded organelle//nuclear chromosome//cell//membrane-enclosed lumen//nucleus//intracellular//organelle//cell part//organelle lumen//intracellular non-membrane-bounded organelle//intracellular part//nuclear origin of replication recognition complex//nuclear lumen//intracellular organelle part//intracellular organelle//intracellular organelle lumen//organelle part//i…	GO:1901363//GO:0003677//GO:0003676//GO:0097159//GO:0005488//GO:0003674	heterocyclic compound binding//DNA binding//nucleic acid binding//organic cyclic compound binding//binding//molecular_function	K02608 origin recognition complex subunit 6 | (RefSeq) origin of replication complex subunit 6	http://www.genome.jp/dbget-bin/www_bget?sot:102584483	ORC6	Origin recognition complex, subunit 6||Origin recognition complex, subunit 6, metazoa/plant
458	PGSC0003DMG400003401	39.1218	7.7832	2.3295	0.002873	0.010169	UP	--	--	--	--	--	--	no KO assigned | (RefSeq) uncharacterized LOC102601600	http://www.genome.jp/dbget-bin/www_bget?sot:102601600	-	Pentatricopeptide repeat
459	PGSC0003DMG400003405	161.165	58.4969	1.4621	0.00024998	0.0012299	UP	--	--	--	--	--	--	K14485 transport inhibitor response 1 | (RefSeq) protein TRANSPORT INHIBITOR RESPONSE 1-like	http://www.genome.jp/dbget-bin/www_bget?sot:102578728	--	--
460	PGSC0003DMG400003447	346.047	172.544	1.004	0.00095308	0.0039323	UP	--	--	--	--	--	--	no KO assigned | (RefSeq) uncharacterized LOC102604890	http://www.genome.jp/dbget-bin/www_bget?sot:102604890	--	--
461	PGSC0003DMG400003491	124.692	29.9652	2.057	4.5675e-05	0.00027163	UP	--	--	GO:0005575//GO:0016021//GO:0016020//GO:0044425//GO:0031224	cellular_component//integral component of membrane//membrane//membrane part//intrinsic component of membrane	--	--	no KO assigned | (RefSeq) uncharacterized LOC102597124	http://www.genome.jp/dbget-bin/www_bget?sot:102597124	--	--
462	PGSC0003DMG400003502	203.208	75.8936	1.4209	9.1652e-05	0.00050369	UP	--	--	--	--	--	--	K07466 replication factor A1 | (RefSeq) replication protein A 70 kDa DNA-binding subunit B-like	http://www.genome.jp/dbget-bin/www_bget?sot:102582542	--	--
463	PGSC0003DMG400003503	1564.48	718.108	1.1234	4.4818e-06	3.4134e-05	UP	--	--	--	--	GO:0016787//GO:0016817//GO:0047429//GO:0016818//GO:0003674//GO:0003824//GO:0016462	hydrolase activity//hydrolase activity, acting on acid anhydrides//nucleoside-triphosphate diphosphatase activity//hydrolase activity, acting on acid anhydrides, in phosphorus-containing anhydrides//molecular_function//catalytic activity//pyrophosphatase activity	K06287 septum formation protein | (RefSeq) maf-like protein DDB_G0281937	http://www.genome.jp/dbget-bin/www_bget?sot:102578264	-	Inosine triphosphate pyrophosphatase-like||Maf-like protein
464	PGSC0003DMG400003510	190.816	77.1586	1.3063	0.00041494	0.0019131	UP	--	--	--	--	GO:0003676//GO:0003677//GO:1901363//GO:0097159//GO:0005488//GO:0003674	nucleic acid binding//DNA binding//heterocyclic compound binding//organic cyclic compound binding//binding//molecular_function	no KO assigned | (RefSeq) zinc-finger homeodomain protein 6-like	http://www.genome.jp/dbget-bin/www_bget?sot:102582136	-	Homeobox domain-like||ZF-HD homeobox protein, Cys/His-rich dimerisation domain||Homeodomain, ZF-HD class
465	PGSC0003DMG400003513	2630.37	1188.5	1.1461	1.676e-06	1.4155e-05	UP	GO:0008152//GO:0071704//GO:0005975//GO:0008150//GO:0044238	metabolic process//organic substance metabolic process//carbohydrate metabolic process//biological_process//primary metabolic process	GO:0044424//GO:0005737//GO:0009507//GO:0048046//GO:0044435//GO:0043227//GO:0044422//GO:0043229//GO:0044446//GO:0005575//GO:0043231//GO:0009536//GO:0005623//GO:0044444//GO:0009570//GO:0044434//GO:0044464//GO:0043226//GO:0009532//GO:0005576//GO:0005622	intracellular part//cytoplasm//chloroplast//apoplast//plastid part//membrane-bounded organelle//organelle part//intracellular organelle//intracellular organelle part//cellular_component//intracellular membrane-bounded organelle//plastid//cell//cytoplasmic part//chloroplast stroma//chloroplast part//cell part//organelle//plastid stroma//extracellular region//intracellular	GO:0005488//GO:0016853//GO:0003674//GO:0003824//GO:0030246	binding//isomerase activity//molecular_function//catalytic activity//carbohydrate binding	K01792 glucose-6-phosphate 1-epimerase [EC:5.1.3.15] | (RefSeq) putative glucose-6-phosphate 1-epimerase	http://www.genome.jp/dbget-bin/www_bget?sot:102584885	-	Aldose 1-/Glucose-6-phosphate 1-epimerase||Glycoside hydrolase-type carbohydrate-binding||Glucose-6-phosphate 1-epimerase||Galactose mutarotase-like domain
466	PGSC0003DMG400003521	180.683	31.0548	2.5406	5.2287e-06	3.912e-05	UP	GO:0071704//GO:0005975//GO:0008152//GO:0044238//GO:0008150	organic substance metabolic process//carbohydrate metabolic process//metabolic process//primary metabolic process//biological_process	--	--	GO:0003674//GO:0004553//GO:0016787//GO:0016798//GO:0003824	molecular_function//hydrolase activity, hydrolyzing O-glycosyl compounds//hydrolase activity//hydrolase activity, acting on glycosyl bonds//catalytic activity	K19355 mannan endo-1,4-beta-mannosidase [EC:3.2.1.78] | (RefSeq) mannan endo-1,4-beta-mannosidase 7-like	http://www.genome.jp/dbget-bin/www_bget?sot:102588957	-	Glycoside hydrolase superfamily||Glycoside hydrolase, family 5
467	PGSC0003DMG400003534	61.7069	22.7675	1.4385	0.014125	0.039661	UP	GO:0055085//GO:0051179//GO:0009987//GO:0051234//GO:0006810//GO:0008150	transmembrane transport//localization//cellular process//establishment of localization//transport//biological_process	GO:0044422//GO:0016021//GO:0043229//GO:0044446//GO:0005575//GO:0009526//GO:0043231//GO:0044435//GO:0016020//GO:0043227//GO:0044424//GO:0005737//GO:0009507//GO:0044425//GO:0005622//GO:0009941//GO:0044464//GO:0043226//GO:0031224//GO:0031975//GO:0031967//GO:0044434//GO:0009536//GO:0044444//GO:0005623	organelle part//integral component of membrane//intracellular organelle//intracellular organelle part//cellular_component//plastid envelope//intracellular membrane-bounded organelle//plastid part//membrane//membrane-bounded organelle//intracellular part//cytoplasm//chloroplast//membrane part//intracellular//chloroplast envelope//cell part//organelle//intrinsic component of membrane//envelope//org…	--	--	K15115 solute carrier family 25 (mitochondrial folate transporter), member 32 | (RefSeq) folate transporter 1, chloroplastic	http://www.genome.jp/dbget-bin/www_bget?sot:102596943	ATFOLT1	Mitochondrial carrier domain||Mitochondrial carrier protein||Mitochondrial substrate/solute carrier
468	PGSC0003DMG400003536	1139.1	555.778	1.0353	2.93e-05	0.00018321	UP	GO:0010817//GO:0016129//GO:0009887//GO:0048856//GO:0042814//GO:0042445//GO:0042592//GO:0048869//GO:0061458//GO:1901360//GO:0048443//GO:0090567//GO:0008152//GO:0048569//GO:0055088//GO:0042446//GO:0016049//GO:0048827//GO:0046165//GO:0016131//GO:1901576//GO:0048437//GO:0006066//GO:0048438//GO:0065008//GO:0032501//GO:0060560//GO:0071704//GO:0048878//GO:0048466//GO:0009965//GO:0048589//GO:0022414//GO:…	regulation of hormone levels//phytosteroid biosynthetic process//animal organ morphogenesis//anatomical structure development//monopolar cell growth//hormone metabolic process//homeostatic process//cellular developmental process//reproductive system development//organic cyclic compound metabolic process//stamen development//reproductive shoot system development//metabolic process//post-embryonic …	GO:0044425//GO:0005575//GO:0016021//GO:0016020//GO:0031224	membrane part//cellular_component//integral component of membrane//membrane//intrinsic component of membrane	GO:0016709//GO:0004497//GO:0005488//GO:0005506//GO:0046906//GO:0003674//GO:0043167//GO:0046872//GO:0016705//GO:0016491//GO:0003824//GO:0020037//GO:1901363//GO:0046914//GO:0097159//GO:0043169	oxidoreductase activity, acting on paired donors, with incorporation or reduction of molecular oxygen, NAD(P)H as one donor, and incorporation of one atom of oxygen//monooxygenase activity//binding//iron ion binding//tetrapyrrole binding//molecular_function//ion binding//metal ion binding//oxidoreductase activity, acting on paired donors, with incorporation or reduction of molecular oxygen//oxido…	K12637 3-epi-6-deoxocathasterone 23-monooxygenase [EC:1.14.13.112] | (RefSeq) 3-epi-6-deoxocathasterone 23-monooxygenase	http://www.genome.jp/dbget-bin/www_bget?sot:102598106	ROT3	Cytochrome P450, E-class, group IV||Cytochrome P450||Cytochrome P450, conserved site
469	PGSC0003DMG400003545	1980.87	644.996	1.6188	3.4759e-11	7.753e-10	UP	GO:0034645//GO:0006351//GO:0043170//GO:0097659//GO:0071704//GO:0006725//GO:0019222//GO:0051254//GO:0031328//GO:2001141//GO:0044260//GO:1901576//GO:0009059//GO:0045893//GO:0019219//GO:0048518//GO:0051173//GO:0044237//GO:0009893//GO:0031325//GO:0008152//GO:0045935//GO:0051252//GO:0044271//GO:1901360//GO:0006139//GO:1903506//GO:0048522//GO:0010628//GO:0009987//GO:0051171//GO:0044238//GO:0046483//GO:…	cellular macromolecule biosynthetic process//transcription, DNA-templated//macromolecule metabolic process//nucleic acid-templated transcription//organic substance metabolic process//cellular aromatic compound metabolic process//regulation of metabolic process//positive regulation of RNA metabolic process//positive regulation of cellular biosynthetic process//regulation of RNA biosynthetic proces…	GO:0043227//GO:0043229//GO:0043231//GO:0005575//GO:0044424//GO:0043226//GO:0044464//GO:0005634//GO:0005622//GO:0005623	membrane-bounded organelle//intracellular organelle//intracellular membrane-bounded organelle//cellular_component//intracellular part//organelle//cell part//nucleus//intracellular//cell	GO:0046872//GO:0043167//GO:0003700//GO:0003674//GO:0005488//GO:0008270//GO:0043169//GO:0097159//GO:0046914//GO:1901363//GO:0003676//GO:0003677//GO:0043565	metal ion binding//ion binding//DNA-binding transcription factor activity//molecular_function//binding//zinc ion binding//cation binding//organic cyclic compound binding//transition metal ion binding//heterocyclic compound binding//nucleic acid binding//DNA binding//sequence-specific DNA binding	no KO assigned | (RefSeq) GATA transcription factor 5-like	http://www.genome.jp/dbget-bin/www_bget?sot:102603672	-	Zinc finger, NHR/GATA-type||Zinc finger, GATA-type||Transcription factor, GATA, plant
470	PGSC0003DMG400003569	38.1801	11.3189	1.7541	0.0137	0.038655	UP	--	--	GO:0031224//GO:0044425//GO:0016021//GO:0005575//GO:0016020	intrinsic component of membrane//membrane part//integral component of membrane//cellular_component//membrane	--	--	no KO assigned | (RefSeq) thaumatin-like protein 1	http://www.genome.jp/dbget-bin/www_bget?sot:102592061	-	Thaumatin||Thaumatin, conserved site
471	PGSC0003DMG400003571	113.14	35.7788	1.6609	0.00037454	0.00175	UP	--	--	--	--	--	--	no KO assigned | (RefSeq) pathogenesis-related protein 5-like	http://www.genome.jp/dbget-bin/www_bget?sot:102600305	-	Thaumatin, conserved site||Thaumatin
472	PGSC0003DMG400003573	45.949	9.18879	2.3221	0.0010586	0.0043059	UP	--	--	--	--	--	--	no KO assigned | (RefSeq) thiosulfate sulfurtransferase 18	http://www.genome.jp/dbget-bin/www_bget?sot:102594050	-	Rhodanese-like domain
473	PGSC0003DMG400003596	424.502	199.412	1.09	0.0007647	0.0032446	UP	GO:0015031//GO:0045184//GO:0006886//GO:0051179//GO:0046907//GO:0070727//GO:0051234//GO:0006810//GO:0008150//GO:0034613//GO:0016192//GO:0051649//GO:0033036//GO:0051641//GO:0071702//GO:0008104	protein transport//establishment of protein localization//intracellular protein transport//localization//intracellular transport//cellular macromolecule localization//establishment of localization//transport//biological_process//cellular protein localization//vesicle-mediated transport//establishment of localization in cell//macromolecule localization//cellular localization//organic substance tra…	GO:0044464//GO:0005622//GO:0044444//GO:0005623//GO:0030119//GO:0030117//GO:0048475//GO:0098796//GO:0016020//GO:0032991//GO:0005575//GO:0005737//GO:0044425//GO:0030123//GO:0044424	cell part//intracellular//cytoplasmic part//cell//AP-type membrane coat adaptor complex//membrane coat//coated membrane//membrane protein complex//membrane//protein-containing complex//cellular_component//cytoplasm//membrane part//AP-3 adaptor complex//intracellular part	GO:0005215//GO:0008565//GO:0003674	transporter activity//protein transporter activity//molecular_function	K12399 AP-3 complex subunit sigma | (RefSeq) AP-3 complex subunit sigma-like	http://www.genome.jp/dbget-bin/www_bget?sot:102579906	-	Longin-like domain||AP-3 complex subunit sigma||Adaptor protein complex, sigma subunit||AP complex, mu/sigma subunit||Clathrin adaptor complex, small chain
474	PGSC0003DMG400003624	38.8188	2.14947	4.1747	9.8796e-06	6.9214e-05	UP	--	--	--	--	--	--	--	--	--	--
475	PGSC0003DMG400003631	350.698	50.433	2.7978	3.8334e-11	8.493e-10	UP	--	--	GO:0031224//GO:0044425//GO:0016020//GO:0005575//GO:0016021	intrinsic component of membrane//membrane part//membrane//cellular_component//integral component of membrane	--	--	no KO assigned | (RefSeq) DNA mismatch repair protein MLH3-like	http://www.genome.jp/dbget-bin/www_bget?sot:102582017	--	--
476	PGSC0003DMG400003640	33.8928	1.89811	4.1583	0.00071941	0.0030766	UP	--	--	--	--	--	--	no KO assigned | (RefSeq) uncharacterized LOC102589393	http://www.genome.jp/dbget-bin/www_bget?sot:102589393	--	--
477	PGSC0003DMG400003653	2439.28	1104.29	1.1433	1.8429e-06	1.5394e-05	UP	GO:0050896//GO:0008150//GO:0006950	response to stimulus//biological_process//response to stress	--	--	--	--	no KO assigned | (RefSeq) uncharacterized LOC102601883	http://www.genome.jp/dbget-bin/www_bget?sot:102601883	-	UspA||Rossmann-like alpha/beta/alpha sandwich fold
478	PGSC0003DMG400003656	121.261	17.7591	2.7715	0.00015694	0.00081229	UP	GO:0043170//GO:0071704//GO:0008152//GO:0006508//GO:0044238//GO:0019538//GO:0008150	macromolecule metabolic process//organic substance metabolic process//metabolic process//proteolysis//primary metabolic process//protein metabolic process//biological_process	GO:0016020//GO:0016021//GO:0005575//GO:0044425//GO:0031224	membrane//integral component of membrane//cellular_component//membrane part//intrinsic component of membrane	GO:0008233//GO:0004190//GO:0003674//GO:0004175//GO:0016787//GO:0070001//GO:0070011//GO:0003824	peptidase activity//aspartic-type endopeptidase activity//molecular_function//endopeptidase activity//hydrolase activity//aspartic-type peptidase activity//peptidase activity, acting on L-amino acid peptides//catalytic activity	no KO assigned | (RefSeq) aspartic proteinase-like protein 1	http://www.genome.jp/dbget-bin/www_bget?sot:102602891	-	Aspartic peptidase, active site||Aspartic peptidase A1 family||Aspartic peptidase domain||Xylanase inhibitor, N-terminal||Peptidase family A1 domain||Xylanase inhibitor, C-terminal
479	PGSC0003DMG400003691	9.12215	0	Inf	0.011103	0.032286	UP	--	--	--	--	--	--	no KO assigned | (RefSeq) isoflavone reductase-like protein	http://www.genome.jp/dbget-bin/www_bget?sot:102596717	-	NAD(P)-binding domain||NmrA-like domain
480	PGSC0003DMG400003753	3998.23	1728.45	1.2099	2.2248e-07	2.291e-06	UP	--	--	--	--	GO:0043168//GO:0005524//GO:0032553//GO:0032550//GO:0032549//GO:0032559//GO:0032555//GO:0005488//GO:0035639//GO:0043167//GO:1901265//GO:0097367//GO:0036094//GO:0003674//GO:0017076//GO:0001883//GO:0030554//GO:1901363//GO:0000166//GO:0001882//GO:0097159	anion binding//ATP binding//ribonucleotide binding//purine ribonucleoside binding//ribonucleoside binding//adenyl ribonucleotide binding//purine ribonucleotide binding//binding//purine ribonucleoside triphosphate binding//ion binding//nucleoside phosphate binding//carbohydrate derivative binding//small molecule binding//molecular_function//purine nucleotide binding//purine nucleoside binding//ade…	K10688 ubiquitin-conjugating enzyme E2 W [EC:2.3.2.25] | (RefSeq) probable ubiquitin-conjugating enzyme E2 16	http://www.genome.jp/dbget-bin/www_bget?sot:102605143	-	Ubiquitin-conjugating enzyme, active site||Ubiquitin-conjugating enzyme E2||Ubiquitin-conjugating enzyme/RWD-like
481	PGSC0003DMG400003778	129.678	18.9447	2.7751	8.8403e-09	1.2316e-07	UP	GO:0016143//GO:0010556//GO:0060255//GO:0006261//GO:0034654//GO:0019438//GO:0050794//GO:0009653//GO:1901135//GO:0018130//GO:0010468//GO:0032774//GO:2000112//GO:0048523//GO:0065007//GO:0031326//GO:0008150//GO:0019760//GO:0006259//GO:0032989//GO:0006355//GO:0050789//GO:0044249//GO:0031323//GO:0016070//GO:0009889//GO:1901657//GO:0034641//GO:0006790//GO:0051302//GO:1901362//GO:0016043//GO:0044281//GO:…	S-glycoside metabolic process//regulation of macromolecule biosynthetic process//regulation of macromolecule metabolic process//DNA-dependent DNA replication//nucleobase-containing compound biosynthetic process//aromatic compound biosynthetic process//regulation of cellular process//anatomical structure morphogenesis//carbohydrate derivative metabolic process//heterocycle biosynthetic process//re…	GO:0005667//GO:0005623//GO:0043228//GO:0005730//GO:0043226//GO:0044464//GO:0005634//GO:0005622//GO:0031974//GO:0031981//GO:0044424//GO:0043233//GO:0043232//GO:0043227//GO:0044428//GO:0032991//GO:0043231//GO:0005575//GO:0044446//GO:0043229//GO:0070013//GO:0044422	transcription factor complex//cell//non-membrane-bounded organelle//nucleolus//organelle//cell part//nucleus//intracellular//membrane-enclosed lumen//nuclear lumen//intracellular part//organelle lumen//intracellular non-membrane-bounded organelle//membrane-bounded organelle//nuclear part//protein-containing complex//intracellular membrane-bounded organelle//cellular_component//intracellular organ…	GO:1901363//GO:0003677//GO:0003676//GO:0043565//GO:0046983//GO:0097159//GO:0005515//GO:0005488//GO:0046982//GO:0003700//GO:0044212//GO:0001067//GO:0003674	heterocyclic compound binding//DNA binding//nucleic acid binding//sequence-specific DNA binding//protein dimerization activity//organic cyclic compound binding//protein binding//binding//protein heterodimerization activity//DNA-binding transcription factor activity//transcription regulatory region DNA binding//regulatory region nucleic acid binding//molecular_function	K06620 transcription factor E2F3 | (RefSeq) transcription factor E2FC	http://www.genome.jp/dbget-bin/www_bget?sot:102594398	ATE2F2	Winged helix-turn-helix DNA-binding domain||E2F transcription factor, CC-MB domain||E2F Family||E2F/DP family, winged-helix DNA-binding domain
482	PGSC0003DMG400003787	578.69	118.233	2.2912	0.0092183	0.027599	UP	--	--	GO:0044425//GO:0016020//GO:0005575//GO:0016021//GO:0031224	membrane part//membrane//cellular_component//integral component of membrane//intrinsic component of membrane	--	--	no KO assigned | (RefSeq) basic proline-rich protein-like	http://www.genome.jp/dbget-bin/www_bget?sot:102598061	--	--
483	PGSC0003DMG400003809	2188.84	1049.49	1.0605	8.6027e-06	6.11e-05	UP	GO:0051179//GO:0009987//GO:0051234//GO:0006810//GO:0008150//GO:0034220//GO:0055085//GO:0006811	localization//cellular process//establishment of localization//transport//biological_process//ion transmembrane transport//transmembrane transport//ion transport	GO:0031224//GO:0005575//GO:0016021//GO:0016020//GO:0044425	intrinsic component of membrane//cellular_component//integral component of membrane//membrane//membrane part	GO:0022838//GO:0005215//GO:0022803//GO:0022857//GO:0015075//GO:0003674//GO:0008381//GO:0022836//GO:0005216//GO:0015267	substrate-specific channel activity//transporter activity//passive transmembrane transporter activity//transmembrane transporter activity//ion transmembrane transporter activity//molecular_function//mechanosensitive ion channel activity//gated channel activity//ion channel activity//channel activity	no KO assigned | (RefSeq) piezo-type mechanosensitive ion channel homolog	http://www.genome.jp/dbget-bin/www_bget?sot:102605335	-	Piezo non-specific cation channel, R-Ras-binding domain||Piezo family
484	PGSC0003DMG400003816	62.6468	6.40449	3.2901	1.5403e-06	1.314e-05	UP	--	--	GO:0005623//GO:0044427//GO:0043228//GO:0032993//GO:0043226//GO:0000785//GO:0044464//GO:0005634//GO:0005622//GO:0044424//GO:0043232//GO:0032991//GO:0005694//GO:0043227//GO:0044446//GO:0043229//GO:0000786//GO:0044815//GO:0044422//GO:0043231//GO:0005575	cell//chromosomal part//non-membrane-bounded organelle//protein-DNA complex//organelle//chromatin//cell part//nucleus//intracellular//intracellular part//intracellular non-membrane-bounded organelle//protein-containing complex//chromosome//membrane-bounded organelle//intracellular organelle part//intracellular organelle//nucleosome//DNA packaging complex//organelle part//intracellular membrane-bo…	GO:1901363//GO:0003676//GO:0003677//GO:0046983//GO:0097159//GO:0005515//GO:0005488//GO:0046982//GO:0003674	heterocyclic compound binding//nucleic acid binding//DNA binding//protein dimerization activity//organic cyclic compound binding//protein binding//binding//protein heterodimerization activity//molecular_function	K11251 histone H2A | (RefSeq) histone H2AX-like	http://www.genome.jp/dbget-bin/www_bget?sot:102587542	-	Histone H2A, C-terminal domain||Histone H2A||Histone H2A/H2B/H3||Histone-fold||Histone H2A conserved site
485	PGSC0003DMG400003851	84.5692	5.14292	4.0395	3.6073e-10	6.6892e-09	UP	--	--	--	--	--	--	no KO assigned | (RefSeq) basic proline-rich protein-like	http://www.genome.jp/dbget-bin/www_bget?sot:102598061	--	--
486	PGSC0003DMG400003866	52.5073	0.924705	5.8274	4.7658e-08	5.6891e-07	UP	GO:0044085//GO:0008150//GO:0016043//GO:0044248//GO:0005976//GO:0010410//GO:0071554//GO:0009987//GO:0006073//GO:0044238//GO:0071555//GO:0009056//GO:0071840//GO:0010383//GO:0045229//GO:0008152//GO:0044264//GO:0044237//GO:0044036//GO:0016998//GO:0044042//GO:0010411//GO:0044262//GO:0043170//GO:0071704//GO:0005975//GO:0042546//GO:0044260	cellular component biogenesis//biological_process//cellular component organization//cellular catabolic process//polysaccharide metabolic process//hemicellulose metabolic process//cell wall organization or biogenesis//cellular process//cellular glucan metabolic process//primary metabolic process//cell wall organization//catabolic process//cellular component organization or biogenesis//cell wall po…	GO:0005623//GO:0005618//GO:0044464//GO:0005576//GO:0071944//GO:0030312//GO:0048046//GO:0005575	cell//cell wall//cell part//extracellular region//cell periphery//external encapsulating structure//apoplast//cellular_component	GO:0003824//GO:0016740//GO:0016762//GO:0004553//GO:0016798//GO:0016787//GO:0016758//GO:0003674//GO:0016757	catalytic activity//transferase activity//xyloglucan:xyloglucosyl transferase activity//hydrolase activity, hydrolyzing O-glycosyl compounds//hydrolase activity, acting on glycosyl bonds//hydrolase activity//transferase activity, transferring hexosyl groups//molecular_function//transferase activity, transferring glycosyl groups	K08235 xyloglucan:xyloglucosyl transferase [EC:2.4.1.207] | (RefSeq) probable xyloglucan endotransglucosylase/hydrolase protein 32	http://www.genome.jp/dbget-bin/www_bget?sot:102580643	XTH32	Xyloglucan endotransglucosylase/hydrolase||Xyloglucan endo-transglycosylase, C-terminal||Glycoside hydrolase family 16||Concanavalin A-like lectin/glucanase domain
487	PGSC0003DMG400003886	422.13	146.556	1.5262	3.8257e-07	3.7583e-06	UP	--	--	--	--	GO:0003674//GO:0016818//GO:0016817//GO:0016787//GO:0003998//GO:0003824	molecular_function//hydrolase activity, acting on acid anhydrides, in phosphorus-containing anhydrides//hydrolase activity, acting on acid anhydrides//hydrolase activity//acylphosphatase activity//catalytic activity	K01512 acylphosphatase [EC:3.6.1.7] | (RefSeq) acylphosphatase	http://www.genome.jp/dbget-bin/www_bget?sot:102603974	-	Acylphosphatase, conserved site||Acylphosphatase-like domain||Acylphosphatase
488	PGSC0003DMG400003892	827.256	399.312	1.0508	4.6323e-05	0.00027527	UP	--	--	--	--	--	--	no KO assigned | (RefSeq) probable FAD synthase	http://www.genome.jp/dbget-bin/www_bget?sot:102579774	--	--
489	PGSC0003DMG400003898	339.386	70.2442	2.2725	2.2241e-11	5.1545e-10	UP	--	--	--	--	GO:0032555//GO:0005488//GO:0035639//GO:0032550//GO:0016787//GO:0032549//GO:0016817//GO:0043168//GO:0003924//GO:0032553//GO:0017076//GO:0036094//GO:0016818//GO:0003674//GO:0097367//GO:1901265//GO:0043167//GO:0019001//GO:0001882//GO:1901363//GO:0000166//GO:0001883//GO:0003824//GO:0005525//GO:0017111//GO:0032561//GO:0016462//GO:0097159	purine ribonucleotide binding//binding//purine ribonucleoside triphosphate binding//purine ribonucleoside binding//hydrolase activity//ribonucleoside binding//hydrolase activity, acting on acid anhydrides//anion binding//GTPase activity//ribonucleotide binding//purine nucleotide binding//small molecule binding//hydrolase activity, acting on acid anhydrides, in phosphorus-containing anhydrides//mo…	K07910 Ras-related protein Rab-18 | (RefSeq) ras-related protein RABC2a-like	http://www.genome.jp/dbget-bin/www_bget?sot:102583984	-	P-loop containing nucleoside triphosphate hydrolase||Small GTP-binding protein domain||Small GTPase superfamily
490	PGSC0003DMG400003936	4436.3	1341.75	1.7252	5.789e-05	0.00033639	UP	GO:0009308//GO:1901564//GO:0008150//GO:0055114//GO:0006807//GO:0008152//GO:0071704	amine metabolic process//organonitrogen compound metabolic process//biological_process//oxidation-reduction process//nitrogen compound metabolic process//metabolic process//organic substance metabolic process	--	--	GO:0016491//GO:0016641//GO:0003824//GO:0046914//GO:0043169//GO:0016638//GO:0005488//GO:0008131//GO:0048038//GO:0005507//GO:0003674//GO:0048037//GO:0046872//GO:0043167	oxidoreductase activity//oxidoreductase activity, acting on the CH-NH2 group of donors, oxygen as acceptor//catalytic activity//transition metal ion binding//cation binding//oxidoreductase activity, acting on the CH-NH2 group of donors//binding//primary amine oxidase activity//quinone binding//copper ion binding//molecular_function//cofactor binding//metal ion binding//ion binding	K00276 primary-amine oxidase [EC:1.4.3.21] | (RefSeq) primary amine oxidase-like	http://www.genome.jp/dbget-bin/www_bget?sot:102591556	-	Copper amine oxidase, C-terminal||Copper amine oxidase, N3-terminal||Copper amine oxidase, N-terminal||Copper amine oxidase||Copper amine oxidase, N2-terminal
491	PGSC0003DMG400003954	160.315	35.3756	2.1801	4.1836e-07	4.0749e-06	UP	--	--	--	--	--	--	no KO assigned | (RefSeq) uncharacterized protein At4g22758-like	http://www.genome.jp/dbget-bin/www_bget?sot:102605038	--	--
492	PGSC0003DMG400004044	782.099	103.762	2.9141	4.4616e-17	2.4992e-15	UP	--	--	--	--	--	--	no KO assigned | (RefSeq) BTB/POZ domain-containing protein At3g08570	http://www.genome.jp/dbget-bin/www_bget?sot:102587772	-	SKP1/BTB/POZ domain||NPH3 domain||BTB/POZ domain
493	PGSC0003DMG400004073	59.1502	20.9757	1.4957	0.009448	0.028175	UP	GO:0008150//GO:0050896//GO:0006950	biological_process//response to stimulus//response to stress	--	--	--	--	no KO assigned | (RefSeq) uncharacterized LOC102599185	http://www.genome.jp/dbget-bin/www_bget?sot:102599185	-	Rossmann-like alpha/beta/alpha sandwich fold||UspA
494	PGSC0003DMG400004074	1020.66	472.855	1.11	1.4901e-05	9.9547e-05	UP	--	--	--	--	--	--	K18749 protein LSM14 | (RefSeq) protein decapping 5-like	http://www.genome.jp/dbget-bin/www_bget?sot:102599513	-	LSM domain||FDF domain||Lsm14-like, N-terminal||DFDF domain
495	PGSC0003DMG400004075	73.2423	19.3868	1.9176	0.00086459	0.0036127	UP	--	--	--	--	--	--	no KO assigned | (RefSeq) protein MIZU-KUSSEI 1-like	http://www.genome.jp/dbget-bin/www_bget?sot:102600059	-	Protein MIZU-KUSSEI 1-like, plant
496	PGSC0003DMG400004115	85.8181	29.3607	1.5474	0.0026128	0.009392	UP	--	--	GO:0031224//GO:0005575//GO:0016021//GO:0016020//GO:0044425	intrinsic component of membrane//cellular_component//integral component of membrane//membrane//membrane part	--	--	no KO assigned | (RefSeq) uncharacterized LOC102586185	http://www.genome.jp/dbget-bin/www_bget?sot:102586185	-	Six-bladed beta-propeller, TolB-like||NHL repeat
497	PGSC0003DMG400004151	5065.93	2015.4	1.3298	4.9406e-07	4.7438e-06	UP	GO:0042364//GO:0008152//GO:0072528//GO:0006767//GO:0044237//GO:0010266//GO:0044272//GO:1901698//GO:0009719//GO:0009605//GO:0009991//GO:1901360//GO:0007584//GO:0044271//GO:0031667//GO:0006725//GO:0071704//GO:0010033//GO:0014070//GO:1901576//GO:0042723//GO:0042724//GO:0019438//GO:0044283//GO:0006772//GO:0009228//GO:0050896//GO:0018130//GO:0072527//GO:0008150//GO:1901564//GO:0042221//GO:0034641//GO:…	water-soluble vitamin biosynthetic process//metabolic process//pyrimidine-containing compound biosynthetic process//water-soluble vitamin metabolic process//cellular metabolic process//response to vitamin B1//sulfur compound biosynthetic process//response to nitrogen compound//response to endogenous stimulus//response to external stimulus//response to extracellular stimulus//organic cyclic compou…	GO:0005737//GO:0009507//GO:0044424//GO:0044435//GO:0043227//GO:0005575//GO:0043231//GO:0044422//GO:0043229//GO:0044446//GO:0044444//GO:0005623//GO:0009536//GO:0044434//GO:0009570//GO:0009532//GO:0044464//GO:0043226//GO:0005622	cytoplasm//chloroplast//intracellular part//plastid part//membrane-bounded organelle//cellular_component//intracellular membrane-bounded organelle//organelle part//intracellular organelle//intracellular organelle part//cytoplasmic part//cell//plastid//chloroplast part//chloroplast stroma//plastid stroma//cell part//organelle//intracellular	GO:0019904//GO:0016817//GO:0016787//GO:0005488//GO:0051540//GO:0003674//GO:0016818//GO:0003824//GO:0080041//GO:0019144//GO:0016462//GO:0051536//GO:0005515	protein domain specific binding//hydrolase activity, acting on acid anhydrides//hydrolase activity//binding//metal cluster binding//molecular_function//hydrolase activity, acting on acid anhydrides, in phosphorus-containing anhydrides//catalytic activity//ADP-ribose pyrophosphohydrolase activity//ADP-sugar diphosphatase activity//pyrophosphatase activity//iron-sulfur cluster binding//protein bind…	K03147 phosphomethylpyrimidine synthase [EC:4.1.99.17] | (RefSeq) phosphomethylpyrimidine synthase, chloroplastic	http://www.genome.jp/dbget-bin/www_bget?sot:102594417	PY	ThiC-associated domain||Phosphomethylpyrimidine synthase
498	PGSC0003DMG400004191	155.574	8.07099	4.2687	7.051e-08	8.0854e-07	UP	--	--	GO:0031224//GO:0044425//GO:0016020//GO:0005575//GO:0016021	intrinsic component of membrane//membrane part//membrane//cellular_component//integral component of membrane	--	--	no KO assigned | (RefSeq) uncharacterized LOC102586983	http://www.genome.jp/dbget-bin/www_bget?sot:102586983	--	--
499	PGSC0003DMG400004211	1051.87	501.782	1.0678	2.0231e-05	0.00013145	UP	GO:0042221//GO:0008150//GO:0009767//GO:0019684//GO:0018298//GO:0006091//GO:0050896//GO:0044267//GO:0043412//GO:0055114//GO:0019538//GO:0009635//GO:0009636//GO:0009987//GO:0044238//GO:0036211//GO:0006950//GO:0015979//GO:0008152//GO:0044237//GO:0022900//GO:0009772//GO:0006464//GO:0044260//GO:0043170//GO:0071704	response to chemical//biological_process//photosynthetic electron transport chain//photosynthesis, light reaction//protein-chromophore linkage//generation of precursor metabolites and energy//response to stimulus//cellular protein metabolic process//macromolecule modification//oxidation-reduction process//protein metabolic process//response to herbicide//response to toxic substance//cellular proc…	GO:0044434//GO:0098796//GO:0031976//GO:0009523//GO:0044444//GO:0005623//GO:0009534//GO:0044436//GO:0009521//GO:0009536//GO:0005622//GO:0009579//GO:0034357//GO:0031224//GO:0044464//GO:0043226//GO:0042651//GO:0005737//GO:0009507//GO:0044425//GO:0055035//GO:0044424//GO:0005575//GO:0043231//GO:0044422//GO:0016021//GO:0043229//GO:0044446//GO:0044435//GO:0031984//GO:0016020//GO:0043227//GO:0009535//GO:…	chloroplast part//membrane protein complex//plastid thylakoid//photosystem II//cytoplasmic part//cell//chloroplast thylakoid//thylakoid part//photosystem//plastid//intracellular//thylakoid//photosynthetic membrane//intrinsic component of membrane//cell part//organelle//thylakoid membrane//cytoplasm//chloroplast//membrane part//plastid thylakoid membrane//intracellular part//cellular_component//in…	GO:0016491//GO:0003824//GO:1901363//GO:0046914//GO:0097159//GO:0043169//GO:0016679//GO:0016682//GO:0005506//GO:0009055//GO:0005488//GO:0046906//GO:0003674//GO:0016168//GO:0045156//GO:0043167//GO:0046872	oxidoreductase activity//catalytic activity//heterocyclic compound binding//transition metal ion binding//organic cyclic compound binding//cation binding//oxidoreductase activity, acting on diphenols and related substances as donors//oxidoreductase activity, acting on diphenols and related substances as donors, oxygen as acceptor//iron ion binding//electron transfer activity//binding//tetrapyrrol…	--	--	PSBA	Photosynthetic reaction centre, L/M||Translation protein, beta-barrel domain||Photosystem II protein D1||Translation initiation factor IF- 2, domain 3
500	PGSC0003DMG400004285	1019.76	201.098	2.3423	6.1672e-18	3.8304e-16	UP	GO:0006807//GO:0010467//GO:0090304//GO:0006304//GO:0009987//GO:0044238//GO:0046483//GO:0065007//GO:0010468//GO:0006259//GO:0044728//GO:0040029//GO:0008150//GO:0006305//GO:0050789//GO:0034641//GO:0060255//GO:0043412//GO:0043414//GO:0044260//GO:0006725//GO:0019222//GO:0043170//GO:0071704//GO:0090116//GO:0006139//GO:1901360//GO:0032776//GO:0032259//GO:0008152//GO:0006306//GO:0044237	nitrogen compound metabolic process//gene expression//nucleic acid metabolic process//DNA modification//cellular process//primary metabolic process//heterocycle metabolic process//biological regulation//regulation of gene expression//DNA metabolic process//DNA methylation or demethylation//regulation of gene expression, epigenetic//biological_process//DNA alkylation//regulation of biological proc…	GO:0005634//GO:0005622//GO:0043226//GO:0044464//GO:0005623//GO:0043231//GO:0005575//GO:0043229//GO:0043227//GO:0044424	nucleus//intracellular//organelle//cell part//cell//intracellular membrane-bounded organelle//cellular_component//intracellular organelle//membrane-bounded organelle//intracellular part	GO:0044877//GO:0003682//GO:0016740//GO:0003824//GO:0008168//GO:0003674//GO:0005488//GO:0016741	protein-containing complex binding//chromatin binding//transferase activity//catalytic activity//methyltransferase activity//molecular_function//binding//transferase activity, transferring one-carbon groups	K00558 DNA (cytosine-5)-methyltransferase 1 [EC:2.1.1.37] | (RefSeq) DNA (cytosine-5)-methyltransferase 1	http://www.genome.jp/dbget-bin/www_bget?sot:102580641	CMT3	S-adenosyl-L-methionine-dependent methyltransferase||Chromo domain||Chromo domain, conserved site||Chromo domain-like||Bromo adjacent homology (BAH) domain||Chromo/chromo shadow domain||DNA methylase, C-5 cytosine-specific, active site||C-5 cytosine methyltransferase
501	PGSC0003DMG400004287	127.02	46.2206	1.4584	0.00046447	0.0021084	UP	GO:0006810//GO:0051234//GO:0008150//GO:0051179//GO:0009987//GO:0098655//GO:0055085//GO:0006812//GO:0006811//GO:0034220	transport//establishment of localization//biological_process//localization//cellular process//cation transmembrane transport//transmembrane transport//cation transport//ion transport//ion transmembrane transport	GO:0031224//GO:0044425//GO:0016021//GO:0005575//GO:0016020	intrinsic component of membrane//membrane part//integral component of membrane//cellular_component//membrane	GO:0022857//GO:0008324//GO:0015075//GO:0005215//GO:0003674	transmembrane transporter activity//cation transmembrane transporter activity//ion transmembrane transporter activity//transporter activity//molecular_function	no KO assigned | (RefSeq) metal tolerance protein 4-like	http://www.genome.jp/dbget-bin/www_bget?sot:102582321	-	Cation efflux protein||Cation efflux protein, cytoplasmic domain
502	PGSC0003DMG400004298	83.2437	0	Inf	0.0066972	0.020962	UP	--	--	--	--	--	--	no KO assigned | (RefSeq) fasciclin-like arabinogalactan protein 2	http://www.genome.jp/dbget-bin/www_bget?sot:102578658	-	FAS1 domain||Fasciclin-like arabinogalactan protein
503	PGSC0003DMG400004304	57.0975	15.3647	1.8938	0.0016968	0.0064739	UP	GO:0008152//GO:0008150//GO:0055114	metabolic process//biological_process//oxidation-reduction process	GO:0005737//GO:0044424//GO:0043227//GO:0043231//GO:0005575//GO:0043229//GO:0044444//GO:0005623//GO:0005783//GO:0012505//GO:0043226//GO:0044464//GO:0005622	cytoplasm//intracellular part//membrane-bounded organelle//intracellular membrane-bounded organelle//cellular_component//intracellular organelle//cytoplasmic part//cell//endoplasmic reticulum//endomembrane system//organelle//cell part//intracellular	GO:0016853//GO:0003756//GO:0003674//GO:0016667//GO:0003824//GO:0016491//GO:0016864//GO:0016860//GO:0016671	isomerase activity//protein disulfide isomerase activity//molecular_function//oxidoreductase activity, acting on a sulfur group of donors//catalytic activity//oxidoreductase activity//intramolecular oxidoreductase activity, transposing S-S bonds//intramolecular oxidoreductase activity//oxidoreductase activity, acting on a sulfur group of donors, disulfide as acceptor	K10950 ERO1-like protein alpha [EC:1.8.4.-] | (RefSeq) endoplasmic reticulum oxidoreductin-1-like	http://www.genome.jp/dbget-bin/www_bget?sot:102580364	ERO2	Endoplasmic reticulum oxidoreductin 1
504	PGSC0003DMG400004398	259.903	60.6757	2.0988	4.5539e-05	0.00027088	UP	--	--	GO:0016020//GO:0005575	membrane//cellular_component	GO:0005488//GO:0003674//GO:1901363//GO:0003676//GO:0097159	binding//molecular_function//heterocyclic compound binding//nucleic acid binding//organic cyclic compound binding	no KO assigned | (RefSeq) uncharacterized LOC102587887	http://www.genome.jp/dbget-bin/www_bget?sot:102587887	-	Zinc finger C2H2-type||TB2/DP1/HVA22-related protein
505	PGSC0003DMG400004456	361.169	142.304	1.3437	0.00028044	0.0013605	UP	--	--	--	--	GO:0003674//GO:0005488//GO:0097159//GO:0005515//GO:1901363//GO:0003676//GO:0003677//GO:0046983	molecular_function//binding//organic cyclic compound binding//protein binding//heterocyclic compound binding//nucleic acid binding//DNA binding//protein dimerization activity	no KO assigned | (RefSeq) uncharacterized LOC102589543	http://www.genome.jp/dbget-bin/www_bget?sot:102589543	-	Zinc finger, BED-type||Domain of unknown function DUF659||HAT, C-terminal dimerisation domain||Ribonuclease H-like domain
506	PGSC0003DMG400004518	421.234	77.4222	2.4438	1.276e-05	8.6862e-05	UP	--	--	GO:0031224//GO:0016020//GO:0005575//GO:0016021//GO:0044425	intrinsic component of membrane//membrane//cellular_component//integral component of membrane//membrane part	--	--	--	--	--	--
507	PGSC0003DMG400004519	1310.19	572.656	1.194	2.1147e-06	1.744e-05	UP	--	--	--	--	--	--	K17278 membrane-associated progesterone receptor component | (RefSeq) membrane steroid-binding protein 2	http://www.genome.jp/dbget-bin/www_bget?sot:102604867	-	Cytochrome b5-like heme/steroid binding domain
508	PGSC0003DMG400004548	166.918	4.5411	5.2	0.0032123	0.011193	UP	GO:0044092//GO:0044260//GO:0032268//GO:0019222//GO:0071704//GO:0043170//GO:0030162//GO:0010605//GO:0010951//GO:0006508//GO:0009892//GO:0051336//GO:0050790//GO:0008152//GO:0010466//GO:0044237//GO:0052547//GO:0045861//GO:0019538//GO:0048519//GO:0080090//GO:0065009//GO:0031324//GO:0044238//GO:0009987//GO:0008150//GO:0051346//GO:0065007//GO:0048523//GO:0043086//GO:0050789//GO:0031323//GO:0052548//GO:…	negative regulation of molecular function//cellular macromolecule metabolic process//regulation of cellular protein metabolic process//regulation of metabolic process//organic substance metabolic process//macromolecule metabolic process//regulation of proteolysis//negative regulation of macromolecule metabolic process//negative regulation of endopeptidase activity//proteolysis//negative regulatio…	GO:0005575//GO:0016021//GO:0016020//GO:0044425//GO:0031224	cellular_component//integral component of membrane//membrane//membrane part//intrinsic component of membrane	GO:0003674//GO:0004857//GO:0061134//GO:0030234//GO:0030414//GO:0004866//GO:0098772//GO:0061135//GO:0004867	molecular_function//enzyme inhibitor activity//peptidase regulator activity//enzyme regulator activity//peptidase inhibitor activity//endopeptidase inhibitor activity//molecular function regulator//endopeptidase regulator activity//serine-type endopeptidase inhibitor activity	no KO assigned | (RefSeq) pin2; proteinase inhibitor type-2	http://www.genome.jp/dbget-bin/www_bget?sot:102581269	-	Proteinase inhibitor I20
509	PGSC0003DMG400004554	1308.69	469.594	1.4786	7.0878e-09	1.0112e-07	UP	--	--	--	--	GO:0046872//GO:0043167//GO:0003674//GO:0005488//GO:0005509//GO:0043169	metal ion binding//ion binding//molecular_function//binding//calcium ion binding//cation binding	K06268 serine/threonine-protein phosphatase 2B regulatory subunit | (RefSeq) calcineurin B-like protein 1	http://www.genome.jp/dbget-bin/www_bget?sot:102582923	-	EF-hand domain pair||EF-Hand 1, calcium-binding site||EF-hand domain
510	PGSC0003DMG400004580	272.921	114.157	1.2575	0.00015546	0.0008052	UP	--	--	--	--	GO:0003674//GO:0005488//GO:0005515//GO:0046983	molecular_function//binding//protein binding//protein dimerization activity	no KO assigned | (RefSeq) transcription factor bHLH62-like	http://www.genome.jp/dbget-bin/www_bget?sot:102603736	-	Myc-type, basic helix-loop-helix (bHLH) domain
511	PGSC0003DMG400004593	148.643	50.2474	1.5647	9.2762e-05	0.00050868	UP	GO:1901135//GO:0046348//GO:0006040//GO:1901136//GO:1901072//GO:1901564//GO:0008150//GO:0044248//GO:0071554//GO:0009057//GO:0009987//GO:0044238//GO:0009056//GO:0006807//GO:1901575//GO:0006030//GO:1901565//GO:0008152//GO:1901071//GO:0044237//GO:0006032//GO:0006026//GO:0044036//GO:0016998//GO:0043170//GO:0071704//GO:0006022//GO:0005975//GO:0044260	carbohydrate derivative metabolic process//amino sugar catabolic process//amino sugar metabolic process//carbohydrate derivative catabolic process//glucosamine-containing compound catabolic process//organonitrogen compound metabolic process//biological_process//cellular catabolic process//cell wall organization or biogenesis//macromolecule catabolic process//cellular process//primary metabolic pr…	--	--	GO:0003824//GO:0004568//GO:0004553//GO:0016798//GO:0016787//GO:0003674	catalytic activity//chitinase activity//hydrolase activity, hydrolyzing O-glycosyl compounds//hydrolase activity, acting on glycosyl bonds//hydrolase activity//molecular_function	no KO assigned | (RefSeq) chitinase-like protein 1	http://www.genome.jp/dbget-bin/www_bget?sot:102597960	-	Glycoside hydrolase, family 19||Glycoside hydrolase, family 19, catalytic||Lysozyme-like domain
512	PGSC0003DMG400004615	103.734	22.0693	2.2328	5.4415e-06	4.0478e-05	UP	GO:0006396//GO:0044238//GO:0046483//GO:0009987//GO:0090304//GO:0010467//GO:0006807//GO:0031123//GO:0016070//GO:0034641//GO:0008150//GO:0071704//GO:0043170//GO:0006725//GO:0044260//GO:0044237//GO:0008152//GO:0043631//GO:0006139//GO:1901360	RNA processing//primary metabolic process//heterocycle metabolic process//cellular process//nucleic acid metabolic process//gene expression//nitrogen compound metabolic process//RNA 3'-end processing//RNA metabolic process//cellular nitrogen compound metabolic process//biological_process//organic substance metabolic process//macromolecule metabolic process//cellular aromatic compound metabolic pr…	GO:0043226//GO:0044464//GO:0031224//GO:0005634//GO:0005622//GO:0005623//GO:0043227//GO:0016020//GO:0043229//GO:0016021//GO:0043231//GO:0005575//GO:0044424//GO:0044425	organelle//cell part//intrinsic component of membrane//nucleus//intracellular//cell//membrane-bounded organelle//membrane//intracellular organelle//integral component of membrane//intracellular membrane-bounded organelle//cellular_component//intracellular part//membrane part	GO:0097159//GO:0003723//GO:1901363//GO:0003676//GO:0003824//GO:0016740//GO:0016772//GO:0070566//GO:0016779//GO:0003674//GO:0004652//GO:0005488	organic cyclic compound binding//RNA binding//heterocyclic compound binding//nucleic acid binding//catalytic activity//transferase activity//transferase activity, transferring phosphorus-containing groups//adenylyltransferase activity//nucleotidyltransferase activity//molecular_function//polynucleotide adenylyltransferase activity//binding	K14376 poly(A) polymerase [EC:2.7.7.19] | (RefSeq) nuclear poly(A) polymerase 3-like	http://www.genome.jp/dbget-bin/www_bget?sot:102598065	-	Nucleotidyltransferase, class I, C-terminal-like||Poly(A) polymerase||Poly(A) polymerase, central domain
513	PGSC0003DMG400004616	678.837	292.148	1.2164	5.7038e-06	4.2218e-05	UP	GO:0065007//GO:0008150//GO:0050789//GO:0043086//GO:0048519//GO:0065009//GO:0009892//GO:0008152//GO:0050790//GO:0044092//GO:0019222	biological regulation//biological_process//regulation of biological process//negative regulation of catalytic activity//negative regulation of biological process//regulation of molecular function//negative regulation of metabolic process//metabolic process//regulation of catalytic activity//negative regulation of molecular function//regulation of metabolic process	--	--	GO:0030234//GO:0098772//GO:0003674//GO:0004857	enzyme regulator activity//molecular function regulator//molecular_function//enzyme inhibitor activity	no KO assigned | (RefSeq) INH2alpha, INVINH2A, INVINH2B; cell wall / vacuolar inhibitor of fructosidase 1	http://www.genome.jp/dbget-bin/www_bget?sot:102586828	-	Cell wall/vacuolar inhibitor of fructosidase||Pectinesterase inhibitor domain
514	PGSC0003DMG400004618	42.6974	5.94569	2.8442	0.0083077	0.025251	UP	GO:0019222//GO:0044092//GO:0050790//GO:0008152//GO:0009892//GO:0065009//GO:0048519//GO:0008150//GO:0065007//GO:0043086//GO:0050789	regulation of metabolic process//negative regulation of molecular function//regulation of catalytic activity//metabolic process//negative regulation of metabolic process//regulation of molecular function//negative regulation of biological process//biological_process//biological regulation//negative regulation of catalytic activity//regulation of biological process	--	--	GO:0004857//GO:0003674//GO:0030234//GO:0098772	enzyme inhibitor activity//molecular_function//enzyme regulator activity//molecular function regulator	no KO assigned | (RefSeq) cell wall / vacuolar inhibitor of fructosidase 1-like	http://www.genome.jp/dbget-bin/www_bget?sot:102586165	-	Pectinesterase inhibitor domain||Cell wall/vacuolar inhibitor of fructosidase
515	PGSC0003DMG400004657	175.276	56.8522	1.6243	0.0035443	0.012191	UP	GO:1903830//GO:0072511//GO:0006811//GO:0055085//GO:0006812//GO:0009987//GO:0015693//GO:0051179//GO:0070838//GO:0030001//GO:0006810//GO:0051234//GO:0008150	magnesium ion transmembrane transport//divalent inorganic cation transport//ion transport//transmembrane transport//cation transport//cellular process//magnesium ion transport//localization//divalent metal ion transport//metal ion transport//transport//establishment of localization//biological_process	GO:0016020//GO:0005886//GO:0043227//GO:0016021//GO:0043229//GO:0005575//GO:0043231//GO:0044424//GO:0005737//GO:0005769//GO:0044425//GO:0071944//GO:0044464//GO:0043226//GO:0031224//GO:0012505//GO:0005622//GO:0005768//GO:0044444//GO:0005623	membrane//plasma membrane//membrane-bounded organelle//integral component of membrane//intracellular organelle//cellular_component//intracellular membrane-bounded organelle//intracellular part//cytoplasm//early endosome//membrane part//cell periphery//cell part//organelle//intrinsic component of membrane//endomembrane system//intracellular//endosome//cytoplasmic part//cell	GO:0003674//GO:0072509//GO:0005215//GO:0046873//GO:0008324//GO:0015075//GO:0022857//GO:0022890//GO:0015095	molecular_function//divalent inorganic cation transmembrane transporter activity//transporter activity//metal ion transmembrane transporter activity//cation transmembrane transporter activity//ion transmembrane transporter activity//transmembrane transporter activity//inorganic cation transmembrane transporter activity//magnesium ion transmembrane transporter activity	no KO assigned | (RefSeq) probable magnesium transporter NIPA2	http://www.genome.jp/dbget-bin/www_bget?sot:102583207	-	Magnesium transporter NIPA
516	PGSC0003DMG400004674	2207.21	1045.13	1.0785	5.2091e-06	3.9023e-05	UP	--	--	GO:0031224//GO:0016020//GO:0005575//GO:0016021//GO:0044425	intrinsic component of membrane//membrane//cellular_component//integral component of membrane//membrane part	--	--	K08246 cycloeucalenol cycloisomerase [EC:5.5.1.9] | (RefSeq) cycloeucalenol cycloisomerase	http://www.genome.jp/dbget-bin/www_bget?sot:102603067	CPI1	Cycloeucalenol cycloisomerase
517	PGSC0003DMG400004727	907.143	407.157	1.1557	0.0028683	0.010155	UP	--	--	GO:0044425//GO:0016020//GO:0005575//GO:0016021//GO:0031224	membrane part//membrane//cellular_component//integral component of membrane//intrinsic component of membrane	--	--	no KO assigned | (RefSeq) receptor-like protein 12	http://www.genome.jp/dbget-bin/www_bget?sot:102593483	-	Leucine-rich repeat||Leucine-rich repeat, typical subtype||Leucine-rich repeat domain, L domain-like
518	PGSC0003DMG400004737	17.8646	1.2309	3.8593	0.015418	0.042754	UP	--	--	--	--	--	--	no KO assigned | (RefSeq) 14 kDa proline-rich protein DC2.15-like	http://www.genome.jp/dbget-bin/www_bget?sot:102584535	-	Bifunctional inhibitor/plant lipid transfer protein/seed storage helical domain||Hydrophobic seed protein
519	PGSC0003DMG400004743	37.6969	1.2309	4.9367	0.002277	0.0083539	UP	--	--	--	--	--	--	no KO assigned | (RefSeq) uncharacterized LOC102579659	http://www.genome.jp/dbget-bin/www_bget?sot:102579659	-	Protein of unknown function DUF863, plant
520	PGSC0003DMG400004746	1198.94	558.387	1.1024	1.4469e-05	9.7029e-05	UP	--	--	--	--	--	--	K20456 oxysterol-binding protein 1 | (RefSeq) oxysterol-binding protein-related protein 2A	http://www.genome.jp/dbget-bin/www_bget?sot:102578345	-	Pleckstrin homology domain||Oxysterol-binding protein||PH domain-like
521	PGSC0003DMG400004764	298.189	63.5986	2.2292	1.9885e-10	3.8661e-09	UP	--	--	--	--	--	--	no KO assigned | (RefSeq) putative pentatricopeptide repeat-containing protein At5g47460	http://www.genome.jp/dbget-bin/www_bget?sot:102593378	-	Pentatricopeptide repeat||Tetratricopeptide-like helical domain
522	PGSC0003DMG400004797	98.3153	5.51143	4.1569	0.01055	0.030924	UP	--	--	--	--	--	--	no KO assigned | (RefSeq) 14 kDa proline-rich protein DC2.15-like	http://www.genome.jp/dbget-bin/www_bget?sot:102584535	-	Hydrophobic seed protein||Bifunctional inhibitor/plant lipid transfer protein/seed storage helical domain
523	PGSC0003DMG400004799	1476.92	594.782	1.3122	1.584e-07	1.6777e-06	UP	--	--	GO:0005575//GO:0016021//GO:0016020//GO:0044425//GO:0031224	cellular_component//integral component of membrane//membrane//membrane part//intrinsic component of membrane	--	--	no KO assigned | (RefSeq) NADH dehydrogenase [ubiquinone] 1 beta subcomplex subunit 8, mitochondrial	http://www.genome.jp/dbget-bin/www_bget?sot:102604645	--	--
524	PGSC0003DMG400004872	12.3083	0.361026	5.0914	0.0096732	0.028773	UP	GO:0044238//GO:0044282//GO:0009987//GO:0044281//GO:0044248//GO:0046164//GO:0009056//GO:0055114//GO:1901575//GO:1901615//GO:0019310//GO:0019751//GO:0008150//GO:0071704//GO:0044262//GO:0016052//GO:0005975//GO:1901616//GO:0044275//GO:0006066//GO:0006020//GO:0044237//GO:0046174//GO:0008152	primary metabolic process//small molecule catabolic process//cellular process//small molecule metabolic process//cellular catabolic process//alcohol catabolic process//catabolic process//oxidation-reduction process//organic substance catabolic process//organic hydroxy compound metabolic process//inositol catabolic process//polyol metabolic process//biological_process//organic substance metabolic …	GO:0044464//GO:0005622//GO:0005623//GO:0005575//GO:0044424//GO:0005737	cell part//intracellular//cell//cellular_component//intracellular part//cytoplasm	GO:0043169//GO:0046914//GO:0003824//GO:0016491//GO:0046872//GO:0043167//GO:0003674//GO:0050113//GO:0005488//GO:0005506//GO:0016701	cation binding//transition metal ion binding//catalytic activity//oxidoreductase activity//metal ion binding//ion binding//molecular_function//inositol oxygenase activity//binding//iron ion binding//oxidoreductase activity, acting on single donors with incorporation of molecular oxygen	K00469 inositol oxygenase [EC:1.13.99.1] | (RefSeq) inositol oxygenase 1-like	http://www.genome.jp/dbget-bin/www_bget?sot:102582224	-	Inositol oxygenase
525	PGSC0003DMG400004910	99.4053	42.456	1.2274	0.0070931	0.022006	UP	--	--	GO:0031224//GO:0044425//GO:0016020//GO:0005575//GO:0016021	intrinsic component of membrane//membrane part//membrane//cellular_component//integral component of membrane	--	--	K05387 glutamate receptor, ionotropic, plant | (RefSeq) glutamate receptor 2.8-like	http://www.genome.jp/dbget-bin/www_bget?sot:102604448	--	--
526	PGSC0003DMG400004916	124.061	43.2718	1.5195	0.00042896	0.0019683	UP	GO:0006807//GO:0009058//GO:0010467//GO:0090304//GO:0080090//GO:1901362//GO:0051171//GO:0009987//GO:0046483//GO:0044238//GO:0006355//GO:0031326//GO:0008150//GO:0065007//GO:0010468//GO:2000112//GO:0032774//GO:0009889//GO:0034641//GO:0016070//GO:0031323//GO:0044249//GO:0050789//GO:0034654//GO:0019438//GO:0010556//GO:0060255//GO:0018130//GO:0050794//GO:0019219//GO:0009059//GO:2001141//GO:1901576//GO:…	nitrogen compound metabolic process//biosynthetic process//gene expression//nucleic acid metabolic process//regulation of primary metabolic process//organic cyclic compound biosynthetic process//regulation of nitrogen compound metabolic process//cellular process//heterocycle metabolic process//primary metabolic process//regulation of transcription, DNA-templated//regulation of cellular biosynthet…	--	--	GO:0003674//GO:0003700	molecular_function//DNA-binding transcription factor activity	--	--	ATBZIP4	Basic-leucine zipper domain
527	PGSC0003DMG400004917	93.5421	16.0657	2.5416	1.2992e-05	8.8385e-05	UP	GO:0006928//GO:0008150//GO:0009987//GO:0007018//GO:0007017	movement of cell or subcellular component//biological_process//cellular process//microtubule-based movement//microtubule-based process	GO:0044430//GO:0005623//GO:0043228//GO:0005856//GO:0044464//GO:0043226//GO:0031224//GO:0005622//GO:0005874//GO:0044424//GO:0044425//GO:0043232//GO:0032991//GO:0016020//GO:0015630//GO:0044422//GO:0016021//GO:0043229//GO:0044446//GO:0005575	cytoskeletal part//cell//non-membrane-bounded organelle//cytoskeleton//cell part//organelle//intrinsic component of membrane//intracellular//microtubule//intracellular part//membrane part//intracellular non-membrane-bounded organelle//protein-containing complex//membrane//microtubule cytoskeleton//organelle part//integral component of membrane//intracellular organelle//intracellular organelle par…	GO:0000166//GO:1901363//GO:0003824//GO:0030554//GO:0001883//GO:0001882//GO:0016462//GO:0044877//GO:0097159//GO:0005515//GO:0017111//GO:0008092//GO:0032553//GO:0043168//GO:0005524//GO:0003774//GO:0035639//GO:0005488//GO:0032555//GO:0016817//GO:0032549//GO:0032559//GO:0008017//GO:0016787//GO:0032550//GO:0097367//GO:0003777//GO:0043167//GO:1901265//GO:0015631//GO:0017076//GO:0003674//GO:0016818//GO:…	nucleotide binding//heterocyclic compound binding//catalytic activity//adenyl nucleotide binding//purine nucleoside binding//nucleoside binding//pyrophosphatase activity//protein-containing complex binding//organic cyclic compound binding//protein binding//nucleoside-triphosphatase activity//cytoskeletal protein binding//ribonucleotide binding//anion binding//ATP binding//motor activity//purine r…	K11498 centromeric protein E | (RefSeq) kinesin-related protein 11	http://www.genome.jp/dbget-bin/www_bget?sot:102582775	ZCF125	-||Kinesin motor domain||Kinesin motor domain, conserved site||P-loop containing nucleoside triphosphate hydrolase
528	PGSC0003DMG400004929	157.362	74.0929	1.0867	0.0043854	0.014607	UP	GO:0008152//GO:0018193//GO:0051252//GO:0044237//GO:0051276//GO:0048580//GO:0048856//GO:0018205//GO:0044271//GO:0043981//GO:0090567//GO:1903506//GO:0061458//GO:1901360//GO:0006139//GO:0035065//GO:0048583//GO:0006725//GO:0032501//GO:0019222//GO:0006475//GO:0022414//GO:0048507//GO:0097659//GO:0071704//GO:0006351//GO:0034645//GO:0043170//GO:0009888//GO:0009416//GO:0051128//GO:0048506//GO:0009059//GO:…	metabolic process//peptidyl-amino acid modification//regulation of RNA metabolic process//cellular metabolic process//chromosome organization//regulation of post-embryonic development//anatomical structure development//peptidyl-lysine modification//cellular nitrogen compound biosynthetic process//histone H4-K5 acetylation//reproductive shoot system development//regulation of nucleic acid-template…	GO:1902494//GO:0031981//GO:0044424//GO:0044451//GO:1990234//GO:0043233//GO:0043189//GO:0043227//GO:0044428//GO:0032991//GO:0031248//GO:0043231//GO:0005575//GO:1902493//GO:0005654//GO:0043229//GO:0044446//GO:0044422//GO:0070013//GO:0005623//GO:0035267//GO:0000123//GO:1902562//GO:0043226//GO:0044464//GO:0005634//GO:0005622//GO:0031974	catalytic complex//nuclear lumen//intracellular part//nucleoplasm part//transferase complex//organelle lumen//H4/H2A histone acetyltransferase complex//membrane-bounded organelle//nuclear part//protein-containing complex//protein acetyltransferase complex//intracellular membrane-bounded organelle//cellular_component//acetyltransferase complex//nucleoplasm//intracellular organelle//intracellular o…	--	--	K11341 YEATS domain-containing protein 4 | (RefSeq) transcription initiation factor TFIID subunit 14b-like	http://www.genome.jp/dbget-bin/www_bget?sot:102605551	GAS41	YEATS
529	PGSC0003DMG400004949	58.0305	0	Inf	2.8391e-05	0.00017801	UP	GO:0019752//GO:0044283//GO:0009081//GO:0044249//GO:1901566//GO:0009082//GO:1901564//GO:0008150//GO:0009987//GO:0043436//GO:0044238//GO:0044281//GO:0006082//GO:0008652//GO:0006807//GO:0009058//GO:0016053//GO:0044237//GO:0008152//GO:0071704//GO:1901576//GO:0046394//GO:0006520	carboxylic acid metabolic process//small molecule biosynthetic process//branched-chain amino acid metabolic process//cellular biosynthetic process//organonitrogen compound biosynthetic process//branched-chain amino acid biosynthetic process//organonitrogen compound metabolic process//biological_process//cellular process//oxoacid metabolic process//primary metabolic process//small molecule metabol…	--	--	GO:0052654//GO:0003824//GO:0016740//GO:0052655//GO:0052656//GO:0008483//GO:0016769//GO:0003674//GO:0004084	L-leucine transaminase activity//catalytic activity//transferase activity//L-valine transaminase activity//L-isoleucine transaminase activity//transaminase activity//transferase activity, transferring nitrogenous groups//molecular_function//branched-chain-amino-acid transaminase activity	K00826 branched-chain amino acid aminotransferase [EC:2.6.1.42] | (RefSeq) branched-chain-amino-acid aminotransferase 2, chloroplastic-like	http://www.genome.jp/dbget-bin/www_bget?sot:102602757	-	Aminotransferase class IV||Aminotransferase, class IV, conserved site||Branched-chain amino acid aminotransferase II||Branched-chain aminotransferase
530	PGSC0003DMG400004952	3150.08	964.617	1.7074	3.992e-09	5.9826e-08	UP	--	--	--	--	--	--	--	--	--	--
531	PGSC0003DMG400004954	52.2921	13.2122	1.9847	0.0023004	0.0084272	UP	GO:0005975//GO:0071704//GO:0008152//GO:0044238//GO:0008150	carbohydrate metabolic process//organic substance metabolic process//metabolic process//primary metabolic process//biological_process	--	--	GO:0003674//GO:0016787//GO:0016798//GO:0004553//GO:0003824	molecular_function//hydrolase activity//hydrolase activity, acting on glycosyl bonds//hydrolase activity, hydrolyzing O-glycosyl compounds//catalytic activity	no KO assigned | (RefSeq) endo-1,4-beta-xylanase A-like	http://www.genome.jp/dbget-bin/www_bget?sot:102601527	-	Glycoside hydrolase family 10 domain||Carbohydrate-binding, CenC-like||Glycoside hydrolase superfamily||Galactose-binding domain-like
532	PGSC0003DMG400005065	14.8065	0.30619	5.5957	0.0023049	0.0084407	UP	--	--	--	--	GO:0048037//GO:0003674//GO:0005488//GO:0050662//GO:0003824	cofactor binding//molecular_function//binding//coenzyme binding//catalytic activity	K08695 anthocyanidin reductase [EC:1.3.1.77] | (RefSeq) anthocyanidin reductase	http://www.genome.jp/dbget-bin/www_bget?sot:102584577	BAN	NAD-dependent epimerase/dehydratase||NAD(P)-binding domain
533	PGSC0003DMG400005088	6390.62	2772.4	1.2048	1.679e-07	1.7714e-06	UP	--	--	--	--	GO:0005488//GO:0003674//GO:0046983//GO:0005515	binding//molecular_function//protein dimerization activity//protein binding	no KO assigned | (RefSeq) transcription factor bHLH68	http://www.genome.jp/dbget-bin/www_bget?sot:102605353	-	Myc-type, basic helix-loop-helix (bHLH) domain
534	PGSC0003DMG400005094	253.233	90.2488	1.4885	1.4572e-05	9.7636e-05	UP	--	--	--	--	--	--	--	--	--	--
535	PGSC0003DMG400005106	1545.25	522.401	1.5646	4.856e-10	8.8013e-09	UP	--	--	GO:0031224//GO:0044425//GO:0016021//GO:0005575//GO:0016020	intrinsic component of membrane//membrane part//integral component of membrane//cellular_component//membrane	--	--	no KO assigned | (RefSeq) uncharacterized protein At3g49720-like	http://www.genome.jp/dbget-bin/www_bget?sot:102588140	-	S-adenosyl-L-methionine-dependent methyltransferase
536	PGSC0003DMG400005112	39816.2	16274.4	1.2907	2.2537e-08	2.8927e-07	UP	--	--	GO:0005576//GO:0005575	extracellular region//cellular_component	--	--	K13449 pathogenesis-related protein 1 | (RefSeq) basic form of pathogenesis-related protein 1-like	http://www.genome.jp/dbget-bin/www_bget?sot:102590095	-	Cysteine-rich secretory protein, allergen V5/Tpx-1-related||Allergen V5/Tpx-1-related, conserved site||Pathogenesis-related protein 1-like, SCP domain||CAP domain
537	PGSC0003DMG400005115	993.223	134.559	2.8839	1.2561e-09	2.0822e-08	UP	--	--	GO:0005575//GO:0005576	cellular_component//extracellular region	--	--	K13449 pathogenesis-related protein 1 | (RefSeq) basic form of pathogenesis-related protein 1-like	http://www.genome.jp/dbget-bin/www_bget?sot:102595432	-	CAP domain||Pathogenesis-related protein 1-like, SCP domain||Ves allergen||Cysteine-rich secretory protein, allergen V5/Tpx-1-related||Allergen V5/Tpx-1-related, conserved site
538	PGSC0003DMG400005116	1075.83	167.607	2.6823	5.1839e-09	7.5441e-08	UP	--	--	GO:0005575//GO:0005576	cellular_component//extracellular region	--	--	K13449 pathogenesis-related protein 1 | (RefSeq) basic form of pathogenesis-related protein 1-like	http://www.genome.jp/dbget-bin/www_bget?sot:102591665	-	Ves allergen||CAP domain||Pathogenesis-related protein 1-like, SCP domain||Allergen V5/Tpx-1-related, conserved site||Cysteine-rich secretory protein, allergen V5/Tpx-1-related
539	PGSC0003DMG400005155	3646.66	1610.26	1.1793	4.7325e-07	4.5543e-06	UP	GO:0051179//GO:0051234//GO:0006810//GO:0008150	localization//establishment of localization//transport//biological_process	GO:0005622//GO:0044464//GO:0005623//GO:0005575	intracellular//cell part//cell//cellular_component	GO:0005215//GO:0003674	transporter activity//molecular_function	no KO assigned | (RefSeq) transporter-like protein	http://www.genome.jp/dbget-bin/www_bget?sot:102577451	-	Cellular retinaldehyde binding/alpha-tocopherol transport||CRAL-TRIO lipid binding domain||CRAL/TRIO, N-terminal domain
540	PGSC0003DMG400005175	2146.2	1005	1.0946	5.012e-06	3.7698e-05	UP	--	--	GO:0016020//GO:0009535//GO:0043227//GO:0031984//GO:0044435//GO:0044446//GO:0043229//GO:0044422//GO:0043231//GO:0009526//GO:0005575//GO:0044424//GO:0055035//GO:0009507//GO:0005737//GO:0042651//GO:0043226//GO:0044464//GO:0009941//GO:0031975//GO:0034357//GO:0009579//GO:0005622//GO:0009536//GO:0009534//GO:0044436//GO:0044444//GO:0005623//GO:0031976//GO:0031967//GO:0044434	membrane//chloroplast thylakoid membrane//membrane-bounded organelle//organelle subcompartment//plastid part//intracellular organelle part//intracellular organelle//organelle part//intracellular membrane-bounded organelle//plastid envelope//cellular_component//intracellular part//plastid thylakoid membrane//chloroplast//cytoplasm//thylakoid membrane//organelle//cell part//chloroplast envelope//en…	--	--	no KO assigned | (RefSeq) uncharacterized LOC102602083	http://www.genome.jp/dbget-bin/www_bget?sot:102602083	--	--
541	PGSC0003DMG400005214	1053.3	193.065	2.4478	1.1274e-18	7.8936e-17	UP	GO:0006811//GO:0015698//GO:0008150//GO:0006810//GO:0051234//GO:0006820//GO:0051179	ion transport//inorganic anion transport//biological_process//transport//establishment of localization//anion transport//localization	GO:0044425//GO:0016020//GO:0005575//GO:0016021//GO:0031224	membrane part//membrane//cellular_component//integral component of membrane//intrinsic component of membrane	GO:0015297//GO:0005452//GO:0015291//GO:0003674//GO:0015075//GO:0022857//GO:0015301//GO:0008509//GO:0022804//GO:0005215	antiporter activity//inorganic anion exchanger activity//secondary active transmembrane transporter activity//molecular_function//ion transmembrane transporter activity//transmembrane transporter activity//anion:anion antiporter activity//anion transmembrane transporter activity//active transmembrane transporter activity//transporter activity	no KO assigned | (RefSeq) boron transporter 1	http://www.genome.jp/dbget-bin/www_bget?sot:102591235	-	Bicarbonate transporter, eukaryotic||Bicarbonate transporter, C-terminal
542	PGSC0003DMG400005217	986.583	488.398	1.0144	8.3425e-05	0.00046443	UP	GO:0008152//GO:0044237//GO:0043043//GO:0044271//GO:0034645//GO:0043170//GO:0006518//GO:0071704//GO:0009059//GO:0043604//GO:0044260//GO:1901576//GO:0044267//GO:0008150//GO:1901564//GO:0034641//GO:0044249//GO:1901566//GO:0006412//GO:0009987//GO:0044238//GO:0006807//GO:0019538//GO:0009058//GO:0010467//GO:0043603	metabolic process//cellular metabolic process//peptide biosynthetic process//cellular nitrogen compound biosynthetic process//cellular macromolecule biosynthetic process//macromolecule metabolic process//peptide metabolic process//organic substance metabolic process//macromolecule biosynthetic process//amide biosynthetic process//cellular macromolecule metabolic process//organic substance biosynt…	GO:0005737//GO:0044424//GO:0044391//GO:0005840//GO:0043232//GO:0032991//GO:0005575//GO:0044422//GO:0044446//GO:0043229//GO:0044444//GO:0005623//GO:0043228//GO:0015934//GO:0044464//GO:0043226//GO:0005622	cytoplasm//intracellular part//ribosomal subunit//ribosome//intracellular non-membrane-bounded organelle//protein-containing complex//cellular_component//organelle part//intracellular organelle part//intracellular organelle//cytoplasmic part//cell//non-membrane-bounded organelle//large ribosomal subunit//cell part//organelle//intracellular	GO:0003674//GO:0005198//GO:0003735	molecular_function//structural molecule activity//structural constituent of ribosome	K02874 large subunit ribosomal protein L14 | (RefSeq) 50S ribosomal protein HLP, mitochondrial-like	http://www.genome.jp/dbget-bin/www_bget?sot:102592234	-	Ribosomal protein L14P, bacterial-type||Ribosomal protein L14P, conserved site||Ribosomal protein L14P
543	PGSC0003DMG400005246	5350.6	2094.37	1.3532	9.9118e-09	1.3668e-07	UP	GO:1901360//GO:0044271//GO:0044237//GO:0042558//GO:0042559//GO:0008152//GO:1901576//GO:0071704//GO:0006725//GO:0034641//GO:0044249//GO:1901566//GO:0008150//GO:1901564//GO:0006729//GO:0051188//GO:0018130//GO:0019438//GO:0006732//GO:0006807//GO:0009058//GO:0009987//GO:0046146//GO:0046483//GO:0051186//GO:0009108//GO:1901362	organic cyclic compound metabolic process//cellular nitrogen compound biosynthetic process//cellular metabolic process//pteridine-containing compound metabolic process//pteridine-containing compound biosynthetic process//metabolic process//organic substance biosynthetic process//organic substance metabolic process//cellular aromatic compound metabolic process//cellular nitrogen compound metabolic…	GO:0044424//GO:0005737//GO:0009507//GO:0043229//GO:0005575//GO:0043231//GO:0043227//GO:0009536//GO:0044444//GO:0005623//GO:0005622//GO:0044464//GO:0043226	intracellular part//cytoplasm//chloroplast//intracellular organelle//cellular_component//intracellular membrane-bounded organelle//membrane-bounded organelle//plastid//cytoplasmic part//cell//intracellular//cell part//organelle	GO:0016829//GO:0003674//GO:0016835//GO:0008124//GO:0003824//GO:0016836	lyase activity//molecular_function//carbon-oxygen lyase activity//4-alpha-hydroxytetrahydrobiopterin dehydratase activity//catalytic activity//hydro-lyase activity	no KO assigned | (RefSeq) putative pterin-4-alpha-carbinolamine dehydratase	http://www.genome.jp/dbget-bin/www_bget?sot:102595361	-	Transcriptional coactivator/pterin dehydratase
544	PGSC0003DMG400005285	241.272	96.8209	1.3173	0.00012607	0.00066912	UP	--	--	--	--	--	--	K03453 bile acid:Na+ symporter, BASS family | (RefSeq) probable sodium/metabolite cotransporter BASS1, chloroplastic	http://www.genome.jp/dbget-bin/www_bget?sot:102606347	--	--
545	PGSC0003DMG400005329	3768.93	1752.67	1.1046	1.964e-06	1.63e-05	UP	GO:0008152//GO:0051252//GO:0044237//GO:0044271//GO:1903506//GO:0006139//GO:1901360//GO:0006725//GO:0019222//GO:0071704//GO:0097659//GO:0043170//GO:0006351//GO:0034645//GO:0009059//GO:0019219//GO:1901576//GO:0044260//GO:2001141//GO:0010556//GO:0060255//GO:0034654//GO:0019438//GO:0050794//GO:0018130//GO:0010468//GO:2000112//GO:0032774//GO:0065007//GO:0031326//GO:0008150//GO:0006355//GO:0050789//GO:…	metabolic process//regulation of RNA metabolic process//cellular metabolic process//cellular nitrogen compound biosynthetic process//regulation of nucleic acid-templated transcription//nucleobase-containing compound metabolic process//organic cyclic compound metabolic process//cellular aromatic compound metabolic process//regulation of metabolic process//organic substance metabolic process//nucle…	--	--	GO:0005488//GO:0003700//GO:0003674//GO:1901363//GO:0003677//GO:0003676//GO:0043565//GO:0097159	binding//DNA-binding transcription factor activity//molecular_function//heterocyclic compound binding//DNA binding//nucleic acid binding//sequence-specific DNA binding//organic cyclic compound binding	no KO assigned | (RefSeq) probable WRKY transcription factor 21	http://www.genome.jp/dbget-bin/www_bget?sot:102588457	-	WRKY domain||Zn-cluster domain
546	PGSC0003DMG400005333	529.03	218.05	1.2787	9.6528e-06	6.7847e-05	UP	--	--	--	--	GO:0043169//GO:0005488//GO:0046872//GO:0043167//GO:0003674	cation binding//binding//metal ion binding//ion binding//molecular_function	no KO assigned | (RefSeq) zinc finger CCCH domain-containing protein 32	http://www.genome.jp/dbget-bin/www_bget?sot:102593128	-	Zinc finger, CCCH-type
547	PGSC0003DMG400005365	274.002	26.8655	3.3504	2.672e-17	1.5374e-15	UP	--	--	GO:0031224//GO:0044425//GO:0005575//GO:0016021//GO:0016020	intrinsic component of membrane//membrane part//cellular_component//integral component of membrane//membrane	--	--	no KO assigned | (RefSeq) formin-like protein 2	http://www.genome.jp/dbget-bin/www_bget?sot:102600023	-	Formin, FH2 domain
548	PGSC0003DMG400005415	1079.7	507.585	1.0889	2.6278e-05	0.00016599	UP	--	--	--	--	--	--	no KO assigned | (RefSeq) auxin-induced in root cultures protein 12	http://www.genome.jp/dbget-bin/www_bget?sot:102581154	-	Cytochrome b561 and DOMON domain-containing protein||DOMON domain
549	PGSC0003DMG400005419	204.392	97.6016	1.0664	0.0028819	0.010196	UP	--	--	GO:0005575//GO:0016020//GO:0005886//GO:0071944//GO:0044464//GO:0005623	cellular_component//membrane//plasma membrane//cell periphery//cell part//cell	GO:0003674//GO:0016818//GO:0036094//GO:0017076//GO:1901265//GO:0043167//GO:0097367//GO:0016817//GO:0032549//GO:0016787//GO:0032550//GO:0035639//GO:0005488//GO:0032555//GO:0032553//GO:0003924//GO:0043168//GO:0017111//GO:0097159//GO:0016462//GO:0032561//GO:0001882//GO:0019001//GO:0005525//GO:0003824//GO:0001883//GO:0000166//GO:1901363	molecular_function//hydrolase activity, acting on acid anhydrides, in phosphorus-containing anhydrides//small molecule binding//purine nucleotide binding//nucleoside phosphate binding//ion binding//carbohydrate derivative binding//hydrolase activity, acting on acid anhydrides//ribonucleoside binding//hydrolase activity//purine ribonucleoside binding//purine ribonucleoside triphosphate binding//bi…	K07904 Ras-related protein Rab-11A | (RefSeq) ras-related protein RABA5e-like	http://www.genome.jp/dbget-bin/www_bget?sot:102581739	AtRABA5b	Small GTP-binding protein domain||Small GTPase superfamily||P-loop containing nucleoside triphosphate hydrolase
550	PGSC0003DMG400005442	2267.08	792.666	1.516	2.3409e-08	3.0007e-07	UP	--	--	GO:0016021//GO:0005575//GO:0005886//GO:0016020//GO:0031225//GO:0031226//GO:0071944//GO:0044425//GO:0044459//GO:0046658//GO:0044464//GO:0031224//GO:0005623	integral component of membrane//cellular_component//plasma membrane//membrane//anchored component of membrane//intrinsic component of plasma membrane//cell periphery//membrane part//plasma membrane part//anchored component of plasma membrane//cell part//intrinsic component of membrane//cell	--	--	no KO assigned | (RefSeq) uncharacterized GPI-anchored protein At4g28100	http://www.genome.jp/dbget-bin/www_bget?sot:102586269	--	--
551	PGSC0003DMG400005503	1835.15	874.139	1.07	8.5435e-06	6.0708e-05	UP	--	--	GO:0031224//GO:0016020//GO:0016021//GO:0005575//GO:0044425	intrinsic component of membrane//membrane//integral component of membrane//cellular_component//membrane part	--	--	no KO assigned | (RefSeq) uncharacterized LOC102578890	http://www.genome.jp/dbget-bin/www_bget?sot:102578890	-	Protein of unknown function DUF3754
552	PGSC0003DMG400005507	1618.04	603.094	1.4238	1.6541e-06	1.3995e-05	UP	GO:0006629//GO:0008150//GO:0044238//GO:0055114//GO:0008152//GO:0071704	lipid metabolic process//biological_process//primary metabolic process//oxidation-reduction process//metabolic process//organic substance metabolic process	GO:0031224//GO:0044425//GO:0016020//GO:0005575//GO:0016021	intrinsic component of membrane//membrane part//membrane//cellular_component//integral component of membrane	GO:0003824//GO:0016705//GO:0016491//GO:0045485//GO:0016717//GO:0003674	catalytic activity//oxidoreductase activity, acting on paired donors, with incorporation or reduction of molecular oxygen//oxidoreductase activity//omega-6 fatty acid desaturase activity//oxidoreductase activity, acting on paired donors, with oxidation of a pair of donors resulting in the reduction of molecular oxygen to two molecules of water//molecular_function	K10256 omega-6 fatty acid desaturase / acyl-lipid omega-6 desaturase (Delta-12 desaturase) [EC:1.14.19.6 1.14.19.22] | (RefSeq) delta(12) oleic acid desaturase FAD2-like	http://www.genome.jp/dbget-bin/www_bget?sot:102580407	-	Fatty acid desaturase, N-terminal||Fatty acid desaturase domain
553	PGSC0003DMG400005602	139.38	56.2959	1.3079	0.0010443	0.0042533	UP	--	--	GO:0031224//GO:0044425//GO:0016021//GO:0005575//GO:0016020	intrinsic component of membrane//membrane part//integral component of membrane//cellular_component//membrane	--	--	K15283 solute carrier family 35, member E1 | (RefSeq) glucose-6-phosphate/phosphate translocator 1, chloroplastic-like	http://www.genome.jp/dbget-bin/www_bget?sot:102579861	-	Sugar phosphate transporter domain
554	PGSC0003DMG400005656	411.153	105.613	1.9609	9.5635e-07	8.6298e-06	UP	GO:0008152//GO:0005975//GO:0071704//GO:0008150//GO:0044238	metabolic process//carbohydrate metabolic process//organic substance metabolic process//biological_process//primary metabolic process	--	--	GO:0016798//GO:0016787//GO:0004553//GO:0003674//GO:0003824	hydrolase activity, acting on glycosyl bonds//hydrolase activity//hydrolase activity, hydrolyzing O-glycosyl compounds//molecular_function//catalytic activity	K05350 beta-glucosidase [EC:3.2.1.21] | (RefSeq) beta-glucosidase 44-like	http://www.genome.jp/dbget-bin/www_bget?sot:102579818	-	Glycoside hydrolase family 1||Glycosyl hydrolases family 1, N-terminal conserved site||Glycoside hydrolase superfamily
555	PGSC0003DMG400005668	1295.3	326.241	1.9893	3.5577e-05	0.00021768	UP	GO:0006508//GO:0008152//GO:0043170//GO:0071704//GO:0008150//GO:0019538//GO:0044238	proteolysis//metabolic process//macromolecule metabolic process//organic substance metabolic process//biological_process//protein metabolic process//primary metabolic process	--	--	GO:0004175//GO:0016787//GO:0004252//GO:0008233//GO:0003674//GO:0008236//GO:0017171//GO:0003824//GO:0070011	endopeptidase activity//hydrolase activity//serine-type endopeptidase activity//peptidase activity//molecular_function//serine-type peptidase activity//serine hydrolase activity//catalytic activity//peptidase activity, acting on L-amino acid peptides	no KO assigned | (RefSeq) uncharacterized LOC102601774	http://www.genome.jp/dbget-bin/www_bget?sot:102601774	-	Alpha/Beta hydrolase fold||Uncharacterised conserved protein UCP031088, alpha/beta hydrolase, At1g15070||Peptidase S9, serine active site
556	PGSC0003DMG400005672	203.157	17.0456	3.5751	3.3269e-16	1.6757e-14	UP	--	--	--	--	--	--	no KO assigned | (RefSeq) uncharacterized LOC102595818	http://www.genome.jp/dbget-bin/www_bget?sot:102595818	-	Protein of unknown function DUF4539
557	PGSC0003DMG400005683	145.638	51.7647	1.4923	0.00032514	0.0015489	UP	GO:0052547//GO:0045861//GO:0019538//GO:0048519//GO:0080090//GO:0065009//GO:0031324//GO:0044238//GO:0009987//GO:0008150//GO:0051346//GO:0065007//GO:0048523//GO:0043086//GO:0050789//GO:0031323//GO:0052548//GO:0060255//GO:0051246//GO:0051248//GO:0044267//GO:0032269//GO:0050794//GO:0044092//GO:0044260//GO:0032268//GO:0019222//GO:0071704//GO:0043170//GO:0030162//GO:0010605//GO:0010951//GO:0006508//GO:…	regulation of peptidase activity//negative regulation of proteolysis//protein metabolic process//negative regulation of biological process//regulation of primary metabolic process//regulation of molecular function//negative regulation of cellular metabolic process//primary metabolic process//cellular process//biological_process//negative regulation of hydrolase activity//biological regulation//ne…	--	--	GO:0061135//GO:0003674//GO:0004857//GO:0061134//GO:0030234//GO:0004869//GO:0030414//GO:0004866//GO:0098772	endopeptidase regulator activity//molecular_function//enzyme inhibitor activity//peptidase regulator activity//enzyme regulator activity//cysteine-type endopeptidase inhibitor activity//peptidase inhibitor activity//endopeptidase inhibitor activity//molecular function regulator	no KO assigned | (RefSeq) uncharacterized LOC102606444	http://www.genome.jp/dbget-bin/www_bget?sot:102606444	-	Cystatin domain
558	PGSC0003DMG400005687	74.7328	17.0132	2.1351	0.00012566	0.0006674	UP	--	--	--	--	--	--	no KO assigned | (RefSeq) methyltransferase-like protein 22	http://www.genome.jp/dbget-bin/www_bget?sot:102588965	-	Lysine methyltransferase||S-adenosyl-L-methionine-dependent methyltransferase
559	PGSC0003DMG400005719	1623.5	395.802	2.0363	1.5714e-06	1.339e-05	UP	--	--	--	--	--	--	no KO assigned | (RefSeq) LOB domain-containing protein 41-like	http://www.genome.jp/dbget-bin/www_bget?sot:102595607	-	Lateral organ boundaries, LOB
560	PGSC0003DMG400005730	50.916	9.07335	2.4884	0.0013763	0.0054077	UP	GO:0043412//GO:0044267//GO:0008150//GO:0036211//GO:0009987//GO:0044238//GO:0006468//GO:0006796//GO:0019538//GO:0044237//GO:0008152//GO:0006793//GO:0043170//GO:0071704//GO:0016310//GO:0006464//GO:0044260	macromolecule modification//cellular protein metabolic process//biological_process//protein modification process//cellular process//primary metabolic process//protein phosphorylation//phosphate-containing compound metabolic process//protein metabolic process//cellular metabolic process//metabolic process//phosphorus metabolic process//macromolecule metabolic process//organic substance metabolic p…	GO:0031224//GO:0044425//GO:0016020//GO:0016021//GO:0005575	intrinsic component of membrane//membrane part//membrane//integral component of membrane//cellular_component	GO:1901363//GO:0000166//GO:0001883//GO:0003824//GO:0030554//GO:0004672//GO:0030246//GO:0016772//GO:0016740//GO:0001882//GO:0001871//GO:0030247//GO:0097159//GO:0016773//GO:0016301//GO:0043168//GO:0005524//GO:0032553//GO:0032555//GO:0005488//GO:0035639//GO:0032550//GO:0032549//GO:0032559//GO:0097367//GO:1901265//GO:0043167//GO:0017076//GO:0036094//GO:0003674	heterocyclic compound binding//nucleotide binding//purine nucleoside binding//catalytic activity//adenyl nucleotide binding//protein kinase activity//carbohydrate binding//transferase activity, transferring phosphorus-containing groups//transferase activity//nucleoside binding//pattern binding//polysaccharide binding//organic cyclic compound binding//phosphotransferase activity, alcohol group as …	K04733 interleukin-1 receptor-associated kinase 4 [EC:2.7.11.1] | (RefSeq) probable receptor-like protein kinase At5g39020	http://www.genome.jp/dbget-bin/www_bget?sot:102599227	-	Protein kinase-like domain||Wall-associated receptor kinase, C-terminal||Protein kinase domain||Wall-associated receptor kinase, galacturonan-binding domain||Protein kinase, ATP binding site||Serine/threonine-protein kinase, active site
561	PGSC0003DMG400005732	466.102	169.029	1.4634	9.9006e-07	8.9043e-06	UP	--	--	--	--	--	--	no KO assigned | (RefSeq) L-Ala-D/L-amino acid epimerase	http://www.genome.jp/dbget-bin/www_bget?sot:102583148	CYP77A5P	Mandelate racemase/muconate lactonizing enzyme, N-terminal domain||Mandelate racemase/muconate lactonizing enzyme, C-terminal||Enolase N-terminal domain-like||Enolase C-terminal domain-like
562	PGSC0003DMG400005737	57.7261	1.3467	5.4217	6.4466e-10	1.1447e-08	UP	GO:0050896//GO:0008150//GO:0006259//GO:0034641//GO:0090304//GO:0006281//GO:0046483//GO:0044238//GO:0009987//GO:0090305//GO:0033554//GO:0006807//GO:0008152//GO:0006974//GO:0006950//GO:0044237//GO:0051716//GO:0006139//GO:1901360//GO:0006725//GO:0071704//GO:0043170//GO:0044260	response to stimulus//biological_process//DNA metabolic process//cellular nitrogen compound metabolic process//nucleic acid metabolic process//DNA repair//heterocycle metabolic process//primary metabolic process//cellular process//nucleic acid phosphodiester bond hydrolysis//cellular response to stress//nitrogen compound metabolic process//metabolic process//cellular response to DNA damage stimul…	GO:0005623//GO:0043226//GO:0044464//GO:0005634//GO:0005622//GO:0044424//GO:0043227//GO:0043231//GO:0005575//GO:0043229	cell//organelle//cell part//nucleus//intracellular//intracellular part//membrane-bounded organelle//intracellular membrane-bounded organelle//cellular_component//intracellular organelle	GO:0003824//GO:1901363//GO:0003677//GO:0003676//GO:0016788//GO:0097159//GO:0004518//GO:0016787//GO:0005488//GO:0003674	catalytic activity//heterocyclic compound binding//DNA binding//nucleic acid binding//hydrolase activity, acting on ester bonds//organic cyclic compound binding//nuclease activity//hydrolase activity//binding//molecular_function	K10746 exonuclease 1 [EC:3.1.-.-] | (RefSeq) exonuclease 1	http://www.genome.jp/dbget-bin/www_bget?sot:102579493	-	XPG-I domain||PIN domain-like||XPG conserved site||5'-3' exonuclease, C-terminal domain||XPG N-terminal||Helix-hairpin-helix motif, class 2||XPG/Rad2 endonuclease
563	PGSC0003DMG400005791	5254.9	2500.49	1.0715	3.5554e-06	2.7836e-05	UP	--	--	--	--	--	--	no KO assigned | (RefSeq) uncharacterized LOC102584958	http://www.genome.jp/dbget-bin/www_bget?sot:102584958	--	--
564	PGSC0003DMG400005792	104.471	32.1191	1.7016	0.0002989	0.0014391	UP	GO:0009206//GO:0055086//GO:1901576//GO:1901659//GO:0006228//GO:0009117//GO:0071704//GO:1901068//GO:0009132//GO:0009220//GO:0016310//GO:0006725//GO:0009209//GO:0044271//GO:0046036//GO:0046129//GO:0006139//GO:1901360//GO:0006753//GO:0042278//GO:0009148//GO:0006793//GO:1901137//GO:0009141//GO:0072522//GO:0006220//GO:0009144//GO:0046134//GO:0044237//GO:0009218//GO:0072528//GO:0008152//GO:0046039//GO:…	purine ribonucleoside triphosphate biosynthetic process//nucleobase-containing small molecule metabolic process//organic substance biosynthetic process//glycosyl compound biosynthetic process//UTP biosynthetic process//nucleotide metabolic process//organic substance metabolic process//guanosine-containing compound metabolic process//nucleoside diphosphate metabolic process//pyrimidine ribonucleot…	--	--	GO:0017076//GO:0036094//GO:0003674//GO:0097367//GO:1901265//GO:0043167//GO:0005488//GO:0032555//GO:0035639//GO:0032550//GO:0032559//GO:0032549//GO:0016301//GO:0016776//GO:0005524//GO:0043168//GO:0032553//GO:0019205//GO:0004550//GO:0097159//GO:0016740//GO:0016772//GO:0001882//GO:1901363//GO:0000166//GO:0001883//GO:0030554//GO:0003824	purine nucleotide binding//small molecule binding//molecular_function//carbohydrate derivative binding//nucleoside phosphate binding//ion binding//binding//purine ribonucleotide binding//purine ribonucleoside triphosphate binding//purine ribonucleoside binding//adenyl ribonucleotide binding//ribonucleoside binding//kinase activity//phosphotransferase activity, phosphate group as acceptor//ATP bin…	K00940 nucleoside-diphosphate kinase [EC:2.7.4.6] | (RefSeq) nucleoside diphosphate kinase 3-like	http://www.genome.jp/dbget-bin/www_bget?sot:102584638	-	Nucleoside diphosphate kinase-like domain||Nucleoside diphosphate kinase||Nucleoside diphosphate kinase, active site
[truncated: 1,714 more rows]
